# Supplementary material for: Natural depletion of histone H1 in sex cells causes DNA demethylation, heterochromatin decondensation and transposon activation
Source: eLife. 2019 May 28;8:e42530. doi: 10.7554/eLife.42530 (PMC6594752; doi:10.7554/eLife.42530)
Supplement: Figure 1—source data 1. [file elife-42530-fig1-data1.xlsx]

## Sheet: Sheet1
Mikado superlocus ID	Transcript location	Tair10 annotation	Strand	Expression fold change (Pollen/leaves)	TSS overlaping VC DME target	TTS overlaping VC DME target	VC DME target within 500 bp of TSS	Expression fold change (dme/+ vs. WT pollen)	Significantly suppressed in pVC::H1	Expression fold change (pVC::H1 pollen/WT pollen)	P value (pVC::H1 pollen/WT pollen differential expression)	mCG SN>VN 500bp around TSS	TE Group in Figure 6
SL_1013	CHR3:14297961-14299733	AT3TE58730 AT3TE58735 AT3TE58740	+	138.55	yes	no	yes	0.447212	no	0.58	0.01	yes	I
SL_1018	CHR3:14587769-14588669	AT3TE59735	+	374.56	yes	yes	yes	1.1428	no	0.73	0.1	yes	I
SL_1070	CHR3:17429827-17432394	AT3TE70635	+	10.32	yes	no	yes	0.412963	no	0.68	0.05	yes	I
SL_1232	CHR3:11416919-11424628	AT3TE47595 AT3TE47600	-	6.36	no	no	yes	9.17014	no	0.91	1	yes	I
SL_1266	CHR3:14710199-14728232	AT3TE60180 AT3TE60185 AT3TE60190 AT3TE60195 AT3TE60200 AT3TE60205 AT3TE60210 AT3TE60215	-	121.83	no	no	yes	1.77757	no	0.95	0.3	yes	I
SL_1283	CHR3:15791501-15792486	AT3TE63845	-	557.75	no	yes	yes	0.246057	no	0.66	0	yes	I
SL_1285	CHR3:15828138-15829842	AT3TE64005	-	2517.23	yes	yes	yes	0.599779	no	0.68	0.01	yes	I
SL_139	CHR1:22742839-22743905	AT1TE74985	+	105.74	no	no	yes	0.00241728	no	0.99	0.63	yes	I
SL_1407	CHR3:5153647-5156488	AT3TE21700	-	30.39	yes	yes	yes	0.598566	no	0.77	0.08	yes	I
SL_1450	CHR3:9900609-9902173	AT3TE41205 AT3TE41210	-	429.84	no	no	yes	1.06354	no	1.07	0.16	yes	I
SL_1467	CHR3:15618774-15619759	AT3TE63155	+	15.3	yes	yes	yes	11.2042	no	0.62	0.23	yes	I
SL_1545	CHR4:1596381-1597239	AT4TE08130	+	20.15	yes	yes	yes	0.39998	no	1.03	0.5	yes	I
SL_1558	CHR4:1961077-1961970	AT4TE09420	+	228.49	yes	yes	yes	0.412772	no	0.58	0.07	yes	I
SL_1562	CHR4:2095371-2096305	AT4TE09940	+	8.29	yes	no	yes	0.0374163	no	0.45	0.17	yes	I
SL_1592	CHR4:4335970-4339318	AT4TE18470	+	42.73	yes	yes	yes	1.1025	no	0.81	0.55	yes	I
SL_1593	CHR4:4340256-4341159	AT4TE18470	+	15.9	no	no	yes	0.970257	no	0.66	0.17	yes	I
SL_1611	CHR4:5200756-5202260	AT4TE21670	+	8.33	yes	no	yes	1.99843	no	0.92	0.42	yes	I
SL_1623	CHR4:6331855-6333020	AT4TE26965	+	15.08	yes	yes	yes	0.762517	no	0.68	0.23	yes	I
SL_1652	CHR4:7689624-7696756	AT4TE33670 AT4TE33675 AT4TE33680 AT4TE33685 AT4TE33690 AT4TE33695 AT4TE33700 AT4TE33705	+	276.01	no	yes	yes	0.265636	no	1.69	0.04	yes	I
SL_1779	CHR4:5506748-5515308	AT4TE23045	-	14.84	no	yes	yes	0.895795	no	1.14	0.02	yes	I
SL_1789	CHR4:6214398-6215545	AT4TE26345 AT4TE26350	-	10.78	yes	no	yes	0.42535	no	1.12	0.17	yes	I
SL_1794	CHR4:6331856-6332758	AT4TE26965	-	11.36	yes	yes	yes	0.313429	no	0.87	0.49	yes	I
SL_1855	CHR5:10035449-10036371	AT5TE36530 AT5TE36535 AT5TE36540 AT5TE36545	+	65.5	yes	yes	yes	0.217284	no	1.15	0.12	yes	I
SL_1905	CHR5:13059805-13060576	AT5TE46460	+	32.51	yes	yes	yes	0.0820759	no	0.57	0.57	yes	I
SL_1927	CHR5:14309525-14310351	AT5TE51190 AT5TE51195 AT5TE51200	+	53.91	yes	yes	yes	0.0545413	no	0.91	0.2	yes	I
SL_2043	CHR5:24024995-24029861	AT5TE86425 AT5TE86430 AT5TE86435 AT5TE86440	+	75.82	yes	yes	yes	0.612699	no	0.76	0.03	yes	I
SL_2097	CHR5:6914088-6915474	AT5TE25085	+	57.86	yes	yes	yes	0.239742	no	0.71	0.01	yes	I
SL_2129	CHR5:9461217-9462770	AT5TE34340 AT5TE34345 AT5TE34350	+	10.4	yes	yes	yes	0.304924	no	0.62	0.07	yes	I
SL_2161	CHR5:10789263-10790115	AT5TE39230	-	19.65	yes	yes	yes	0.362199	no	0.64	0.23	yes	I
SL_2375	CHR5:14012444-14013236	AT5TE49950 AT5TE49955 AT5TE49960	+	47.47	yes	yes	yes	0.0804404	no	0.22	0.07	yes	I
SL_266	CHR1:13212244-13213062	AT1TE43145	-	31.15	yes	yes	yes	0.441817	no	0.93	0.35	yes	I
SL_278	CHR1:13851023-13852153	AT1TE45415 AT1TE45420 AT1TE45425	-	11.35	yes	no	yes	0.290288	no	0.62	0.24	yes	I
SL_28	CHR1:12592582-12593622	AT1TE41025 AT1TE41030 AT1TE41035 AT1TE41040	+	271.02	yes	yes	yes	0.457889	no	0.84	0.2	yes	I
SL_30	CHR1:12699651-12702043	AT1TE41415 AT1TE41420	+	43.51	yes	no	yes	0.652172	no	0.86	0.18	yes	I
SL_305	CHR1:16553422-16554705	AT1TE54585	-	5.07	yes	no	yes	0.516009	no	0.59	0.22	yes	I
SL_323	CHR1:17689432-17690253	AT1TE58740	-	946.11	yes	no	yes	0.222649	no	1.79	0	yes	I
SL_36	CHR1:12899652-12900440	AT1TE42015 AT1TE42020 AT1TE42025 AT1TE42030	+	11.93	yes	yes	yes	0.475519	no	0.56	0.21	yes	I
SL_367	CHR1:21601982-21602988	AT1TE71275 AT1TE71280 AT1TE71285	-	9	yes	yes	yes	0.486923	no	1.09	0.46	yes	I
SL_378	CHR1:22562734-22563528	AT1TE74430	-	18.93	yes	yes	yes	0.311247	no	0.63	0.57	yes	I
SL_47	CHR1:13498788-13501490	AT1TE44180 AT1TE44185 AT1TE44190	+	112.4	yes	no	yes	0.59743	no	1.6	0	yes	I
SL_487	CHR1:14076374-14077090	AT1TE46245 AT1TE46250 AT1TE46255	+	70.17	no	yes	yes	0	no	0.3	0.41	yes	I
SL_52	CHR1:13878087-13878725	AT1TE45520	+	89.11	yes	yes	yes	0	no	0.43	0.09	yes	I
SL_523	CHR2:12811897-12812860	AT2TE56020 AT2TE56025 AT2TE56030 AT2TE56035	+	20.77	yes	yes	yes	0	no	1.48	0.23	yes	I
SL_54	CHR1:13981897-13985550	AT1TE45900	+	15.28	yes	yes	yes	0.307533	no	1	0.36	yes	I
SL_558	CHR2:17337510-17345016	AT2TE78210 AT2TE78215 AT2TE78225	+	5.64	yes	no	yes	0.353752	no	0.67	0.14	yes	I
SL_560	CHR2:1773797-1777078	AT2TE08165 AT2TE08170 AT2TE08175 AT2TE08180 AT2TE08185 AT2TE08190	+	6.62	no	no	yes	0.725072	no	0.84	0.24	yes	I
SL_59	CHR1:15724792-15727525	AT1TE51770 AT1TE51775	+	18.51	no	yes	yes	2.78353	no	0.5	0	yes	I
SL_634	CHR2:5009223-5009989	AT2TE20530 AT2TE20535	+	13.32	yes	yes	yes	0.377758	no	1.5	0.06	yes	I
SL_643	CHR2:5763612-5764379	AT2TE23415 AT2TE23420 AT2TE23425	+	289.27	no	no	yes	0.0746009	no	1.03	0.11	yes	I
SL_647	CHR2:6044148-6045338	AT2TE24590 AT2TE24595 AT2TE24600 AT2TE24605	+	74.89	yes	yes	yes	0.257487	no	0.78	1	yes	I
SL_672	CHR2:7005384-7008261	AT2TE28555	+	13.72	yes	no	yes	0.782381	no	0.51	0	yes	I
SL_697	CHR2:9652494-9655117	AT2TE41170 AT2TE41175	+	8.16	yes	yes	yes	0.76509	no	0.66	0	yes	I
SL_735	CHR2:12811768-12812917	AT2TE56020 AT2TE56025 AT2TE56030 AT2TE56035	-	28.41	yes	yes	yes	0.345557	no	1.09	0.58	yes	I
SL_776	CHR2:1778116-1779202	AT2TE08200 AT2TE08205	-	210.96	yes	yes	yes	0.200205	no	0.87	1	yes	I
SL_807	CHR2:2907419-2919467	AT2TE12665 AT2TE12670 AT2TE12680 AT2TE12685 AT2TE12690 AT2TE12695 AT2TE12700 AT2TE12705 AT2TE12710 AT2TE12715 AT2TE12720 AT2TE12725 AT2TE12735	-	416.7	no	yes	yes	1.63676	no	0.93	1	yes	I
SL_852	CHR2:5411695-5415408	AT2TE21915 AT2TE21920 AT2TE21925 AT2TE21930	-	6.5	no	no	yes	0.275037	no	0.54	0.01	yes	I
SL_869	CHR2:6044023-6045338	AT2TE24590 AT2TE24595 AT2TE24600 AT2TE24605	-	50.17	yes	yes	yes	0	no	0.85	1	yes	I
SL_1247	CHR3:12819532-12820320	AT3TE52695	-	15.61	yes	no	yes	0.587778	yes	0.06	0	yes	II
SL_1675	CHR4:10547590-10552083	AT4TE48230	-	8.27	yes	no	yes	0.299017	yes	0.29	0	yes	II
SL_1722	CHR4:1741553-1742813	AT4TE08720	-	136.87	yes	no	yes	0.178957	yes	0.2	0	yes	II
SL_1879	CHR5:10902123-10903197	AT5TE39630 AT5TE39635	+	454.91	yes	no	yes	0.704489	yes	0.25	0	yes	II
SL_1882	CHR5:11002948-11007562	AT5TE40000	+	60.61	yes	no	yes	0.708738	yes	0.1	0	yes	II
SL_1897	CHR5:12268341-12271236	AT5TE43580	+	17.31	yes	yes	yes	0.506166	yes	0.09	0	yes	II
SL_1922	CHR5:14160210-14162403	AT5TE50560	+	11.52	yes	no	yes	0.664759	yes	0.38	0.01	yes	II
SL_1928	CHR5:14311179-14312297	AT5TE51200	+	36.05	yes	yes	yes	0.245073	yes	0.42	0	yes	II
SL_2160	CHR5:10757295-10759968	AT5TE39140	-	166.5	yes	no	yes	0.228861	yes	0.15	0	yes	II
SL_2164	CHR5:10902361-10906170	AT5TE39630 AT5TE39635 AT5TE39640	-	54.06	yes	no	yes	0.271439	yes	0.39	0	yes	II
SL_2193	CHR5:14588346-14589625	AT5TE52440 AT5TE52445	-	9.74	yes	yes	yes	0.621484	yes	0.35	0.04	yes	II
SL_575	CHR2:1888891-1889899	AT2TE08685	+	56.89	yes	yes	yes	0.154325	yes	0.33	0	yes	II
SL_597	CHR2:2747014-2749291	AT2TE12140 AT2TE12145	+	18.63	yes	yes	yes	0.250299	yes	0.3	0	yes	II
SL_608	CHR2:3198747-3211539	AT2TE13825 AT2TE13830 AT2TE13835 AT2TE13840 AT2TE13845 AT2TE13850 AT2TE13855 AT2TE13865 AT2TE13870 AT2TE13875 AT2TE13880	+	5.99	yes	no	yes	0.742689	yes	0.38	0	yes	II
SL_623	CHR2:4301693-4303276	AT2TE18045 AT2TE18050 AT2TE18055 AT2TE18060	+	73.39	yes	no	yes	0.521581	yes	0.47	0	yes	II
SL_627	CHR2:4543124-4545694	AT2TE18955 AT2TE18965	+	5.04	yes	no	yes	0.720938	yes	0.24	0	yes	II
SL_629	CHR2:4785148-4797880	AT2TE19865 AT2TE19870 AT2TE19875 AT2TE19880 AT2TE19885 AT2TE19890 AT2TE19895 AT2TE19900	+	21.17	yes	no	yes	0.179677	yes	0.12	0	yes	II
SL_838	CHR2:4138207-4138912	AT2TE17485	-	48.78	no	no	yes	0.109928	yes	0.12	0	yes	II
SL_881	CHR2:6837429-6843008	AT2TE27870	-	10.62	yes	no	yes	0.518626	yes	0.19	0	yes	II
SL_882	CHR2:6844925-6848396	AT2TE27880	-	11.46	yes	yes	yes	5.19563	yes	0.45	0	yes	II
SL_1040	CHR3:15813107-15814043	AT3TE63930 AT3TE63935	+	80.02	no	no	yes	4.11114	yes	0.27	0	yes	III
SL_1267	CHR3:14749129-14750431	AT3TE60310	-	34.67	no	no	yes	1.19322	yes	0.46	0	yes	III
SL_1281	CHR3:15733005-15734102	AT3TE63565 AT3TE63570 AT3TE63575 AT3TE63580	-	10.62	yes	yes	yes	0.0895265	yes	0.35	0	yes	III
SL_1432	CHR3:8101239-8102427	AT3TE33980	-	21.86	yes	no	yes	0.201588	yes	0.43	0.03	yes	III
SL_1575	CHR4:2822463-2824799	AT4TE13250 AT4TE13255	+	32.85	yes	yes	yes	0.605585	yes	0.3	0	yes	III
SL_1594	CHR4:4628902-4633454	AT4TE19470	+	8.76	no	no	yes	0.330924	yes	0.2	0	yes	III
SL_1819	CHR4:859396-865570	AT4TE04410 AT4TE04415	-	19.43	yes	no	yes	2.75301	yes	0.45	0	yes	III
SL_1993	CHR5:18624732-18626107	AT5TE67045	+	41.2	no	yes	yes	0.211937	yes	0.19	0	yes	III
SL_1994	CHR5:18667744-18668480	AT5TE67210	+	512.65	yes	yes	yes	0.44098	yes	0.38	0	yes	III
SL_509	CHR2:1085332-1086867	AT2TE04865 AT2TE04870 AT2TE04875 AT2TE04880 AT2TE04885	+	38.41	no	yes	yes	0.127048	yes	0.24	0	yes	III
SL_567	CHR2:1840169-1841180	AT2TE08430 AT2TE08435 AT2TE08440	+	270.98	yes	no	yes	0.95739	yes	0.32	0	yes	III
SL_71	CHR1:16581774-16584506	AT1TE54640 AT1TE54645 AT1TE54650 AT1TE54655	+	11.46	no	no	yes	0.0817486	yes	0.13	0	yes	III
SL_875	CHR2:6438806-6439693	AT2TE26275	-	25.81	yes	no	yes	0.589418	yes	0.26	0	yes	III
SL_949	CHR3:10477856-10485839	AT3TE43550	+	39.44	yes	no	yes	0.393654	yes	0.49	0	yes	III
SL_979	CHR3:12332293-12338368	AT3TE51090 AT3TE51095 AT3TE51100 AT3TE51105 AT3TE51110	+	9.32	yes	no	yes	0.364232	yes	0.24	0	yes	III
SL_1359	CHR3:22382852-22390824	AT3TE91170 AT3TE91175 AT3TE91180 AT3TE91185 AT3TE91190 AT3TE91195 AT3TE91200 AT3TE91205 AT3TE91210 AT3TE91220 AT3TE91225	-	53.85	no	no	no	0.357662	yes	0.5	0	yes	IV
SL_1754	CHR4:5033946-5038526	AT4TE21010 AT4TE21015 AT4TE21020 AT4TE21025 AT4TE21030 AT4TE21035 AT4TE21040	-	15.64	no	no	no	0.160023	yes	0.14	0	no	IV
SL_212	CHR1:7023605-7024646	AT1TE22695 AT1TE22700 AT1TE22705	+	148.96	no	no	no	1.98576	yes	0.33	0	yes	IV
SL_289	CHR1:15751524-15752495	AT1TE51850	-	18.44	no	no	no	0	yes	0.06	0	no	IV
SL_60	CHR1:15752568-15754549	AT1TE51850	+	7.65	no	no	no	0.119907	yes	0.16	0.01	no	IV
SL_836	CHR2:3900465-3901733	AT2TE16635 AT2TE16645	-	5.77	no	no	no	3.87647	yes	0.33	0.05	no	IV
SL_1112	CHR3:22382852-22392733	AT3TE91170 AT3TE91175 AT3TE91180 AT3TE91185 AT3TE91190 AT3TE91195 AT3TE91200 AT3TE91205 AT3TE91210 AT3TE91220 AT3TE91225	+	41.48	no	no	no	1.19633	no	1.38	0.04	no
SL_1231	CHR3:11410610-11414291	AT3TE47555 AT3TE47580	-	5.3	no	no	no	0.264919	yes	0.19	0	no
SL_1676	CHR4:10552327-10553225	AT4TE48230	-	8.68	no	no	no	0.0931569	no	0.82	0.54	yes
SL_1705	CHR4:14285167-14288096	AT4TE67560	-	6.98	no	no	no	0.248069	no	0.47	0.07	yes
SL_1912	CHR5:13351947-13353195	AT5TE47290	+	17.28	no	yes	no	0.601746	yes	0.09	0	yes
SL_2154	CHR5:10664136-10665050	AT5TE38815	-	7.42	no	no	no	0	no	0.89	0.59	yes
SL_2167	CHR5:11288343-11304122	AT5TE40920 AT5TE40925 AT5TE40930 AT5TE40935 AT5TE40940 AT5TE40945 AT5TE40950 AT5TE40955 AT5TE40960	-	17.02	no	no	no	0.403068	yes	0.07	0	yes
SL_256	CHR1:12739947-12740866	AT1TE41525 AT1TE41535	-	42.28	no	yes	no	0.435125	no	0.49	0.12	no
SL_269	CHR1:13294585-13300432	AT1TE43420 AT1TE43425 AT1TE43430 AT1TE43435 AT1TE43440 AT1TE43445	-	5.91	no	no	no	0.137271	yes	0.29	0	yes
SL_284	CHR1:14281946-14282963	AT1TE46830 AT1TE46840 AT1TE46845 AT1TE46850	-	8.39	no	no	no	0.222636	yes	0.26	0.02	yes
SL_319	CHR1:17590049-17590677	AT1TE58390	-	43.05	no	no	no	0	no	0.88	1	no
SL_39	CHR1:13017871-13021182	AT1TE42435 AT1TE42440 AT1TE42445 AT1TE42450 AT1TE42455	+	7.19	no	no	no	0.76042	no	0.53	0	yes
SL_46	CHR1:13400487-13401741	AT1TE43805 AT1TE43810 AT1TE43815 AT1TE43820	+	5.58	no	no	no	2.12744	no	3.29	0	yes
SL_543	CHR2:15161-18590	AT2TE00015	+	5.72	no	no	no	8.1818	no	0.94	1	no
SL_65	CHR1:16243578-16244727	AT1TE53470	+	8.76	no	yes	no	0.179944	no	0.48	0.07	no
SL_966	CHR3:11414928-11424415	AT3TE47585 AT3TE47590 AT3TE47595	+	9.98	no	no	no	3.102	no	0.51	0	yes
