# Supplementary material for: Natural depletion of histone H1 in sex cells causes DNA demethylation, heterochromatin decondensation and transposon activation
Source: eLife. 2019 May 28;8:e42530. doi: 10.7554/eLife.42530 (PMC6594752; doi:10.7554/eLife.42530)
Supplement: Figure 1—source data 2. [file elife-42530-fig1-data2.xlsx]

## Sheet: Sheet1
CHR	Start	End	Overlap H1 hyperDMRs	Significantly CG hypermethylated in the VC of pVC::H1 than WT
CHR1	641	950	yes	yes
CHR1	1592259	1593320	yes	yes
CHR1	1613278	1614158	yes	yes
CHR1	2793845	2794837	yes	yes
CHR1	3006683	3006885	yes	yes
CHR1	3770976	3771098	yes	yes
CHR1	4052206	4052373	yes	yes
CHR1	5101724	5102299	yes	yes
CHR1	5972002	5972271	yes	yes
CHR1	6770424	6770683	yes	yes
CHR1	7745725	7746339	yes	yes
CHR1	7766383	7766511	yes	yes
CHR1	8738102	8738824	yes	yes
CHR1	8764653	8764907	yes	yes
CHR1	8772858	8773050	yes	yes
CHR1	8787273	8787429	yes	yes
CHR1	8809802	8809958	yes	yes
CHR1	8824233	8824336	yes	yes
CHR1	9112256	9112478	yes	yes
CHR1	9135502	9136777	yes	yes
CHR1	9684343	9684734	yes	yes
CHR1	9852847	9853356	yes	yes
CHR1	10443899	10444095	yes	yes
CHR1	10602550	10602851	yes	yes
CHR1	10776102	10777117	yes	yes
CHR1	10883098	10884241	yes	yes
CHR1	10982231	10982396	yes	yes
CHR1	10982719	10982966	yes	yes
CHR1	11306710	11306814	yes	yes
CHR1	11618313	11619291	yes	yes
CHR1	11686916	11687161	yes	yes
CHR1	11704936	11705132	yes	yes
CHR1	11732259	11733629	yes	yes
CHR1	11752189	11753156	yes	yes
CHR1	11894928	11895597	yes	yes
CHR1	11897344	11897624	yes	yes
CHR1	12033021	12035189	yes	yes
CHR1	12035690	12035813	yes	yes
CHR1	12133040	12133472	yes	yes
CHR1	12139885	12140187	yes	yes
CHR1	12278432	12278907	yes	yes
CHR1	12380966	12381174	yes	yes
CHR1	12444030	12444241	yes	yes
CHR1	12445850	12447025	yes	yes
CHR1	12467471	12467629	yes	yes
CHR1	12509478	12509722	yes	yes
CHR1	12510684	12514076	yes	yes
CHR1	12557906	12558335	yes	yes
CHR1	12579387	12579668	yes	yes
CHR1	12679569	12679761	yes	yes
CHR1	12719991	12720494	yes	yes
CHR1	12731734	12732275	yes	yes
CHR1	12814135	12814436	yes	yes
CHR1	12814761	12815467	yes	yes
CHR1	12822802	12824903	yes	yes
CHR1	12829402	12830598	yes	yes
CHR1	12836914	12837035	yes	yes
CHR1	12929523	12930042	yes	yes
CHR1	12930347	12931430	yes	yes
CHR1	12946534	12947020	yes	yes
CHR1	12999812	12999931	yes	yes
CHR1	13007932	13008737	yes	yes
CHR1	13084505	13085468	yes	yes
CHR1	13109141	13109900	yes	yes
CHR1	13110444	13110757	yes	yes
CHR1	13179894	13180477	yes	yes
CHR1	13188391	13188661	yes	yes
CHR1	13232668	13233029	yes	yes
CHR1	13234056	13234963	yes	yes
CHR1	13235661	13236749	yes	yes
CHR1	13268294	13268693	yes	yes
CHR1	13269080	13269280	yes	yes
CHR1	13272132	13272810	yes	yes
CHR1	13301674	13302766	yes	yes
CHR1	13303259	13305953	yes	yes
CHR1	13306309	13306667	yes	yes
CHR1	13307442	13307615	yes	yes
CHR1	13309045	13311714	yes	yes
CHR1	13394397	13394602	yes	yes
CHR1	13402235	13402853	yes	yes
CHR1	13417570	13418072	yes	yes
CHR1	13419706	13420246	yes	yes
CHR1	13506852	13506989	yes	yes
CHR1	13524406	13524875	yes	yes
CHR1	13525186	13526419	yes	yes
CHR1	13600544	13600859	yes	yes
CHR1	13607929	13608578	yes	yes
CHR1	13613565	13613820	yes	yes
CHR1	13629509	13629738	yes	yes
CHR1	13631511	13631887	yes	yes
CHR1	13643288	13644600	yes	yes
CHR1	13656276	13657000	yes	yes
CHR1	13657449	13659088	yes	yes
CHR1	13758249	13758519	yes	yes
CHR1	13759258	13763072	yes	yes
CHR1	13823778	13824567	yes	yes
CHR1	13849062	13849749	yes	yes
CHR1	13875650	13876284	yes	yes
CHR1	13876596	13878235	yes	yes
CHR1	13878620	13881172	yes	yes
CHR1	13907000	13908917	yes	yes
CHR1	13929843	13929949	yes	yes
CHR1	13935722	13936007	yes	yes
CHR1	13966143	13967169	yes	yes
CHR1	13976492	13977212	yes	yes
CHR1	13992444	13992971	yes	yes
CHR1	14016140	14016371	yes	yes
CHR1	14033124	14035537	yes	yes
CHR1	14046019	14046266	yes	yes
CHR1	14057491	14057926	yes	yes
CHR1	14058488	14059043	yes	yes
CHR1	14061029	14061206	yes	yes
CHR1	14065531	14066605	yes	yes
CHR1	14070211	14070324	yes	yes
CHR1	14073498	14073643	yes	yes
CHR1	14079849	14079965	yes	yes
CHR1	14108578	14108861	yes	yes
CHR1	14136895	14137026	yes	yes
CHR1	14191327	14191517	yes	yes
CHR1	14195244	14195525	yes	yes
CHR1	14195841	14195968	yes	yes
CHR1	14311192	14311377	yes	yes
CHR1	14333614	14333875	yes	yes
CHR1	14604310	14607717	yes	yes
CHR1	14657019	14657138	yes	yes
CHR1	14677947	14678649	yes	yes
CHR1	15056513	15057006	yes	yes
CHR1	15058475	15058633	yes	yes
CHR1	15455095	15455346	yes	yes
CHR1	15612301	15612662	yes	yes
CHR1	15613582	15614650	yes	yes
CHR1	15615341	15616095	yes	yes
CHR1	15691395	15691974	yes	yes
CHR1	15715897	15716084	yes	yes
CHR1	15747068	15747175	yes	yes
CHR1	15751045	15751238	yes	yes
CHR1	15772325	15772475	yes	yes
CHR1	15781140	15782496	yes	yes
CHR1	15796286	15797518	yes	yes
CHR1	15797950	15798711	yes	yes
CHR1	15799228	15799520	yes	yes
CHR1	15862419	15862729	yes	yes
CHR1	15875661	15876085	yes	yes
CHR1	15887921	15888474	yes	yes
CHR1	15912246	15912427	yes	yes
CHR1	15913166	15913315	yes	yes
CHR1	15941538	15942222	yes	yes
CHR1	15955434	15955651	yes	yes
CHR1	15959317	15960463	yes	yes
CHR1	15969600	15969733	yes	yes
CHR1	15988911	15989612	yes	yes
CHR1	15990606	15991502	yes	yes
CHR1	15996413	15996834	yes	yes
CHR1	16000520	16000988	yes	yes
CHR1	16025521	16026138	yes	yes
CHR1	16026956	16027106	yes	yes
CHR1	16027557	16027938	yes	yes
CHR1	16043449	16043616	yes	yes
CHR1	16049622	16049751	yes	yes
CHR1	16054500	16054712	yes	yes
CHR1	16057939	16058233	yes	yes
CHR1	16063439	16063609	yes	yes
CHR1	16070812	16071263	yes	yes
CHR1	16076903	16077648	yes	yes
CHR1	16082808	16083054	yes	yes
CHR1	16083756	16083943	yes	yes
CHR1	16116893	16117550	yes	yes
CHR1	16169074	16172534	yes	yes
CHR1	16178306	16178419	yes	yes
CHR1	16249638	16249834	yes	yes
CHR1	16250592	16251605	yes	yes
CHR1	16318068	16318276	yes	yes
CHR1	16321596	16321986	yes	yes
CHR1	16332864	16333728	yes	yes
CHR1	16346107	16348217	yes	yes
CHR1	16348668	16349411	yes	yes
CHR1	16350290	16350401	yes	yes
CHR1	16353285	16353726	yes	yes
CHR1	16355065	16355515	yes	yes
CHR1	16356331	16356613	yes	yes
CHR1	16368154	16368496	yes	yes
CHR1	16410660	16411102	yes	yes
CHR1	16455899	16456908	yes	yes
CHR1	16457233	16457760	yes	yes
CHR1	16592286	16592653	yes	yes
CHR1	16662376	16662512	yes	yes
CHR1	16706090	16706843	yes	yes
CHR1	16741657	16742092	yes	yes
CHR1	16747570	16748503	yes	yes
CHR1	16876638	16878468	yes	yes
CHR1	16885414	16886127	yes	yes
CHR1	16946276	16947122	yes	yes
CHR1	16947981	16948432	yes	yes
CHR1	16960707	16960976	yes	yes
CHR1	16961572	16961685	yes	yes
CHR1	17018282	17019894	yes	yes
CHR1	17020260	17020682	yes	yes
CHR1	17107106	17111616	yes	yes
CHR1	17111928	17112350	yes	yes
CHR1	17187121	17187823	yes	yes
CHR1	17489360	17489627	yes	yes
CHR1	17490237	17490345	yes	yes
CHR1	17574797	17575336	yes	yes
CHR1	17681033	17681462	yes	yes
CHR1	17714669	17715398	yes	yes
CHR1	17924710	17925034	yes	yes
CHR1	18033289	18034176	yes	yes
CHR1	18324734	18325234	yes	yes
CHR1	18373188	18373319	yes	yes
CHR1	18553150	18553767	yes	yes
CHR1	18613019	18613166	yes	yes
CHR1	18657565	18658382	yes	yes
CHR1	18743372	18743506	yes	yes
CHR1	18851469	18851761	yes	yes
CHR1	18955847	18955962	yes	yes
CHR1	19023069	19023742	yes	yes
CHR1	19073050	19073950	yes	yes
CHR1	19713399	19713997	yes	yes
CHR1	20331011	20331140	yes	yes
CHR1	20462366	20462969	yes	yes
CHR1	21302636	21302880	yes	yes
CHR1	21305708	21305952	yes	yes
CHR1	21592684	21593538	yes	yes
CHR1	21729472	21731530	yes	yes
CHR1	21757721	21758532	yes	yes
CHR1	21772593	21773169	yes	yes
CHR1	21777612	21778133	yes	yes
CHR1	21788208	21788952	yes	yes
CHR1	21789258	21791558	yes	yes
CHR1	21799771	21799955	yes	yes
CHR1	21813870	21814989	yes	yes
CHR1	21825129	21826641	yes	yes
CHR1	22107377	22107743	yes	yes
CHR1	22322304	22323290	yes	yes
CHR1	22855059	22855655	yes	yes
CHR1	23360203	23360331	yes	yes
CHR1	23883895	23884748	yes	yes
CHR1	23907103	23907298	yes	yes
CHR1	23929279	23929832	yes	yes
CHR1	23932327	23932626	yes	yes
CHR1	24273094	24273206	yes	yes
CHR1	24360423	24360965	yes	yes
CHR1	24425508	24425787	yes	yes
CHR1	25343395	25343508	yes	yes
CHR1	26385065	26385167	yes	yes
CHR1	26635161	26635532	yes	yes
CHR1	26650726	26650897	yes	yes
CHR1	27635221	27636151	yes	yes
CHR1	28706942	28707257	yes	yes
CHR1	29589529	29589690	yes	yes
CHR2	70881	71748	yes	yes
CHR2	238007	238162	yes	yes
CHR2	566052	566320	yes	yes
CHR2	569674	570248	yes	yes
CHR2	574476	575200	yes	yes
CHR2	578286	578460	yes	yes
CHR2	894530	895707	yes	yes
CHR2	1017539	1017851	yes	yes
CHR2	1070804	1071015	yes	yes
CHR2	1197964	1199202	yes	yes
CHR2	1200687	1201286	yes	yes
CHR2	1228325	1228907	yes	yes
CHR2	1229546	1229669	yes	yes
CHR2	1302198	1302324	yes	yes
CHR2	1304705	1305779	yes	yes
CHR2	1306230	1306379	yes	yes
CHR2	1306937	1308205	yes	yes
CHR2	1343215	1343471	yes	yes
CHR2	1424513	1424657	yes	yes
CHR2	1670067	1671160	yes	yes
CHR2	1745112	1745786	yes	yes
CHR2	1750340	1750514	yes	yes
CHR2	1767174	1769872	yes	yes
CHR2	1771889	1772040	yes	yes
CHR2	1772567	1773683	yes	yes
CHR2	1786751	1787021	yes	yes
CHR2	1795245	1795462	yes	yes
CHR2	1796714	1796927	yes	yes
CHR2	1811612	1811718	yes	yes
CHR2	1812046	1812861	yes	yes
CHR2	1849892	1850024	yes	yes
CHR2	1952042	1953686	yes	yes
CHR2	1954299	1954505	yes	yes
CHR2	1954837	1956439	yes	yes
CHR2	1961608	1966215	yes	yes
CHR2	1980294	1980574	yes	yes
CHR2	1998350	1998611	yes	yes
CHR2	1999330	1999443	yes	yes
CHR2	2049971	2050223	yes	yes
CHR2	2061985	2063677	yes	yes
CHR2	2105290	2105567	yes	yes
CHR2	2106496	2107035	yes	yes
CHR2	2116801	2117032	yes	yes
CHR2	2128176	2128354	yes	yes
CHR2	2134036	2134421	yes	yes
CHR2	2162275	2163783	yes	yes
CHR2	2178355	2178504	yes	yes
CHR2	2186617	2187403	yes	yes
CHR2	2189331	2189691	yes	yes
CHR2	2221210	2221314	yes	yes
CHR2	2248144	2252327	yes	yes
CHR2	2285405	2285680	yes	yes
CHR2	2364847	2365455	yes	yes
CHR2	2369469	2369814	yes	yes
CHR2	2385219	2386729	yes	yes
CHR2	2466515	2466966	yes	yes
CHR2	2534591	2536046	yes	yes
CHR2	2539687	2541558	yes	yes
CHR2	2583189	2583310	yes	yes
CHR2	2603712	2604246	yes	yes
CHR2	2637010	2638340	yes	yes
CHR2	2645045	2645183	yes	yes
CHR2	2646557	2646957	yes	yes
CHR2	2665325	2667196	yes	yes
CHR2	2673825	2674421	yes	yes
CHR2	2687262	2687418	yes	yes
CHR2	2715541	2715673	yes	yes
CHR2	2720122	2720265	yes	yes
CHR2	2732117	2732899	yes	yes
CHR2	2746784	2747214	yes	yes
CHR2	2749257	2749596	yes	yes
CHR2	2768236	2768662	yes	yes
CHR2	2770591	2770694	yes	yes
CHR2	2785911	2786301	yes	yes
CHR2	2809218	2809351	yes	yes
CHR2	2810685	2811007	yes	yes
CHR2	2820694	2822087	yes	yes
CHR2	2822722	2823493	yes	yes
CHR2	2825378	2825896	yes	yes
CHR2	2837095	2837435	yes	yes
CHR2	2838382	2838836	yes	yes
CHR2	2882375	2883529	yes	yes
CHR2	2938201	2941173	yes	yes
CHR2	2946575	2949701	yes	yes
CHR2	2950025	2952541	yes	yes
CHR2	2973294	2973431	yes	yes
CHR2	2991508	2991725	yes	yes
CHR2	2995371	2996031	yes	yes
CHR2	3004168	3004273	yes	yes
CHR2	3008221	3008803	yes	yes
CHR2	3010681	3011348	yes	yes
CHR2	3016338	3016636	yes	yes
CHR2	3018717	3019291	yes	yes
CHR2	3028299	3030475	yes	yes
CHR2	3032663	3033147	yes	yes
CHR2	3035387	3035894	yes	yes
CHR2	3041616	3041893	yes	yes
CHR2	3060776	3061038	yes	yes
CHR2	3083889	3084195	yes	yes
CHR2	3088990	3089311	yes	yes
CHR2	3092608	3092751	yes	yes
CHR2	3094287	3094816	yes	yes
CHR2	3112911	3115470	yes	yes
CHR2	3121344	3122087	yes	yes
CHR2	3131117	3132535	yes	yes
CHR2	3137548	3139502	yes	yes
CHR2	3143283	3143867	yes	yes
CHR2	3145748	3145997	yes	yes
CHR2	3147680	3150664	yes	yes
CHR2	3155697	3156048	yes	yes
CHR2	3157017	3157598	yes	yes
CHR2	3159379	3160586	yes	yes
CHR2	3177497	3177597	yes	yes
CHR2	3181851	3182148	yes	yes
CHR2	3186196	3187426	yes	yes
CHR2	3187878	3190636	yes	yes
CHR2	3214135	3214519	yes	yes
CHR2	3240911	3241130	yes	yes
CHR2	3244665	3244844	yes	yes
CHR2	3245848	3245961	yes	yes
CHR2	3246932	3247988	yes	yes
CHR2	3248302	3249030	yes	yes
CHR2	3249919	3252160	yes	yes
CHR2	3255590	3255947	yes	yes
CHR2	3257336	3257797	yes	yes
CHR2	3259862	3260959	yes	yes
CHR2	3261675	3263943	yes	yes
CHR2	3264546	3264731	yes	yes
CHR2	3265456	3265618	yes	yes
CHR2	3267581	3269286	yes	yes
CHR2	3269653	3270517	yes	yes
CHR2	3272434	3273026	yes	yes
CHR2	3273406	3273922	yes	yes
CHR2	3275734	3276868	yes	yes
CHR2	3277424	3278171	yes	yes
CHR2	3278895	3279491	yes	yes
CHR2	3280536	3281697	yes	yes
CHR2	3282899	3283044	yes	yes
CHR2	3283421	3283723	yes	yes
CHR2	3284081	3284305	yes	yes
CHR2	3285238	3286210	yes	yes
CHR2	3287817	3288691	yes	yes
CHR2	3291883	3293061	yes	yes
CHR2	3293915	3294728	yes	yes
CHR2	3295085	3297113	yes	yes
CHR2	3297613	3297980	yes	yes
CHR2	3298722	3299678	yes	yes
CHR2	3300431	3301455	yes	yes
CHR2	3302322	3302785	yes	yes
CHR2	3303089	3304582	yes	yes
CHR2	3305198	3305752	yes	yes
CHR2	3306291	3307210	yes	yes
CHR2	3308087	3308253	yes	yes
CHR2	3309039	3309484	yes	yes
CHR2	3312987	3315039	yes	yes
CHR2	3315387	3315813	yes	yes
CHR2	3317206	3317612	yes	yes
CHR2	3318819	3320645	yes	yes
CHR2	3320956	3321549	yes	yes
CHR2	3322076	3322287	yes	yes
CHR2	3323143	3323283	yes	yes
CHR2	3323753	3325060	yes	yes
CHR2	3327112	3327687	yes	yes
CHR2	3328458	3328728	yes	yes
CHR2	3331386	3332088	yes	yes
CHR2	3334981	3335233	yes	yes
CHR2	3335768	3338425	yes	yes
CHR2	3338915	3339268	yes	yes
CHR2	3343444	3343544	yes	yes
CHR2	3343946	3344147	yes	yes
CHR2	3345299	3350302	yes	yes
CHR2	3351238	3352648	yes	yes
CHR2	3356424	3357533	yes	yes
CHR2	3358661	3359623	yes	yes
CHR2	3359930	3362349	yes	yes
CHR2	3362803	3363718	yes	yes
CHR2	3364958	3365941	yes	yes
CHR2	3367031	3367663	yes	yes
CHR2	3368241	3368494	yes	yes
CHR2	3369217	3369691	yes	yes
CHR2	3370273	3370851	yes	yes
CHR2	3371160	3371517	yes	yes
CHR2	3373863	3375089	yes	yes
CHR2	3376178	3376688	yes	yes
CHR2	3379038	3379160	yes	yes
CHR2	3388198	3388639	yes	yes
CHR2	3390078	3391086	yes	yes
CHR2	3392559	3392983	yes	yes
CHR2	3414224	3415382	yes	yes
CHR2	3415955	3416370	yes	yes
CHR2	3417843	3419653	yes	yes
CHR2	3419968	3420538	yes	yes
CHR2	3423656	3423814	yes	yes
CHR2	3424180	3425787	yes	yes
CHR2	3431985	3432692	yes	yes
CHR2	3458436	3458584	yes	yes
CHR2	3463743	3465563	yes	yes
CHR2	3469186	3470408	yes	yes
CHR2	3472635	3473697	yes	yes
CHR2	3478591	3478936	yes	yes
CHR2	3479968	3480083	yes	yes
CHR2	3482213	3482790	yes	yes
CHR2	3485225	3485798	yes	yes
CHR2	3486228	3487125	yes	yes
CHR2	3489670	3490492	yes	yes
CHR2	3490913	3491344	yes	yes
CHR2	3491713	3491950	yes	yes
CHR2	3493819	3494472	yes	yes
CHR2	3498250	3498608	yes	yes
CHR2	3499228	3500166	yes	yes
CHR2	3500798	3501333	yes	yes
CHR2	3502511	3502715	yes	yes
CHR2	3503304	3503753	yes	yes
CHR2	3504441	3504799	yes	yes
CHR2	3505365	3506031	yes	yes
CHR2	3506440	3507433	yes	yes
CHR2	3508114	3509401	yes	yes
CHR2	3511313	3512681	yes	yes
CHR2	3593010	3593551	yes	yes
CHR2	3594441	3595420	yes	yes
CHR2	3597860	3598839	yes	yes
CHR2	3720462	3721799	yes	yes
CHR2	3726449	3726658	yes	yes
CHR2	3773510	3773887	yes	yes
CHR2	3774198	3774678	yes	yes
CHR2	3776781	3776980	yes	yes
CHR2	3777327	3779862	yes	yes
CHR2	3794597	3795412	yes	yes
CHR2	3801412	3802383	yes	yes
CHR2	3825375	3825635	yes	yes
CHR2	3831960	3832793	yes	yes
CHR2	3853383	3853903	yes	yes
CHR2	3907993	3908479	yes	yes
CHR2	3925739	3927386	yes	yes
CHR2	3927796	3927898	yes	yes
CHR2	3937228	3938264	yes	yes
CHR2	3938675	3938837	yes	yes
CHR2	3941440	3941743	yes	yes
CHR2	3961214	3961380	yes	yes
CHR2	3962630	3962735	yes	yes
CHR2	3987463	3988063	yes	yes
CHR2	3992378	3992530	yes	yes
CHR2	3994956	3995561	yes	yes
CHR2	3998101	3998363	yes	yes
CHR2	4031774	4034414	yes	yes
CHR2	4038156	4038790	yes	yes
CHR2	4039149	4039294	yes	yes
CHR2	4043820	4043957	yes	yes
CHR2	4044344	4044736	yes	yes
CHR2	4045290	4045837	yes	yes
CHR2	4087114	4087813	yes	yes
CHR2	4138971	4140034	yes	yes
CHR2	4170341	4170457	yes	yes
CHR2	4219865	4220032	yes	yes
CHR2	4268017	4272600	yes	yes
CHR2	4293256	4293401	yes	yes
CHR2	4297851	4297965	yes	yes
CHR2	4299713	4299843	yes	yes
CHR2	4372125	4373024	yes	yes
CHR2	4407060	4407842	yes	yes
CHR2	4422865	4425130	yes	yes
CHR2	4425613	4426538	yes	yes
CHR2	4428723	4430575	yes	yes
CHR2	4431301	4431962	yes	yes
CHR2	4440100	4440646	yes	yes
CHR2	4443471	4443668	yes	yes
CHR2	4444388	4444809	yes	yes
CHR2	4456343	4457496	yes	yes
CHR2	4602569	4603085	yes	yes
CHR2	4608278	4608755	yes	yes
CHR2	4626356	4626888	yes	yes
CHR2	4632684	4632956	yes	yes
CHR2	4633596	4634532	yes	yes
CHR2	4635389	4635772	yes	yes
CHR2	4642047	4642203	yes	yes
CHR2	4642946	4643778	yes	yes
CHR2	4647261	4648191	yes	yes
CHR2	4664576	4664881	yes	yes
CHR2	4667604	4667823	yes	yes
CHR2	4725575	4725731	yes	yes
CHR2	4730228	4730421	yes	yes
CHR2	4733968	4734127	yes	yes
CHR2	4752830	4753013	yes	yes
CHR2	4773958	4774295	yes	yes
CHR2	4775446	4775565	yes	yes
CHR2	4784838	4785693	yes	yes
CHR2	4821945	4822749	yes	yes
CHR2	4823724	4824097	yes	yes
CHR2	4857202	4857464	yes	yes
CHR2	4862520	4862694	yes	yes
CHR2	4881315	4881766	yes	yes
CHR2	4898920	4900022	yes	yes
CHR2	4908925	4909133	yes	yes
CHR2	4915760	4916163	yes	yes
CHR2	4927141	4927267	yes	yes
CHR2	4946790	4946960	yes	yes
CHR2	4947277	4947565	yes	yes
CHR2	4948035	4948579	yes	yes
CHR2	4966195	4967831	yes	yes
CHR2	4970557	4970744	yes	yes
CHR2	5083158	5084838	yes	yes
CHR2	5121215	5121637	yes	yes
CHR2	5143609	5144469	yes	yes
CHR2	5147006	5147239	yes	yes
CHR2	5157944	5159818	yes	yes
CHR2	5161723	5162157	yes	yes
CHR2	5227890	5227994	yes	yes
CHR2	5247300	5248569	yes	yes
CHR2	5249047	5249203	yes	yes
CHR2	5294664	5295766	yes	yes
CHR2	5296075	5296609	yes	yes
CHR2	5318423	5320657	yes	yes
CHR2	5384679	5384883	yes	yes
CHR2	5385390	5386538	yes	yes
CHR2	5388150	5388402	yes	yes
CHR2	5413242	5413360	yes	yes
CHR2	5429553	5431455	yes	yes
CHR2	5437497	5438374	yes	yes
CHR2	5449245	5449514	yes	yes
CHR2	5459199	5459868	yes	yes
CHR2	5460186	5460385	yes	yes
CHR2	5504013	5505449	yes	yes
CHR2	5624323	5624440	yes	yes
CHR2	5627606	5627943	yes	yes
CHR2	5717648	5722116	yes	yes
CHR2	5722759	5723211	yes	yes
CHR2	5727384	5727841	yes	yes
CHR2	5729200	5729862	yes	yes
CHR2	5730973	5731382	yes	yes
CHR2	5778035	5778913	yes	yes
CHR2	5797631	5798412	yes	yes
CHR2	5821769	5821871	yes	yes
CHR2	5861155	5861348	yes	yes
CHR2	5887872	5888247	yes	yes
CHR2	5891806	5892078	yes	yes
CHR2	5893248	5893601	yes	yes
CHR2	5894305	5895021	yes	yes
CHR2	5897359	5897664	yes	yes
CHR2	5898689	5898789	yes	yes
CHR2	5899296	5899701	yes	yes
CHR2	5945873	5947600	yes	yes
CHR2	5964453	5964624	yes	yes
CHR2	5983687	5983919	yes	yes
CHR2	5996952	5997369	yes	yes
CHR2	6007324	6007690	yes	yes
CHR2	6082602	6083021	yes	yes
CHR2	6128015	6129028	yes	yes
CHR2	6139020	6139885	yes	yes
CHR2	6141025	6141644	yes	yes
CHR2	6180464	6180936	yes	yes
CHR2	6186109	6187287	yes	yes
CHR2	6232348	6232538	yes	yes
CHR2	6233875	6236700	yes	yes
CHR2	6256376	6256547	yes	yes
CHR2	6260573	6262184	yes	yes
CHR2	6301173	6301664	yes	yes
CHR2	6325571	6325824	yes	yes
CHR2	6337948	6338451	yes	yes
CHR2	6402580	6402756	yes	yes
CHR2	6412530	6413270	yes	yes
CHR2	6413654	6414123	yes	yes
CHR2	6414447	6414810	yes	yes
CHR2	6472897	6474723	yes	yes
CHR2	6488176	6488900	yes	yes
CHR2	6570305	6570585	yes	yes
CHR2	6596577	6596771	yes	yes
CHR2	6599003	6599204	yes	yes
CHR2	6603429	6604103	yes	yes
CHR2	6624792	6625006	yes	yes
CHR2	6668140	6668240	yes	yes
CHR2	6842984	6843765	yes	yes
CHR2	6844678	6845055	yes	yes
CHR2	6860201	6860718	yes	yes
CHR2	7095919	7096271	yes	yes
CHR2	7203393	7204124	yes	yes
CHR2	7661544	7661956	yes	yes
CHR2	8099612	8100611	yes	yes
CHR2	8199155	8199667	yes	yes
CHR2	8764840	8765773	yes	yes
CHR2	8821930	8822359	yes	yes
CHR2	9257676	9257852	yes	yes
CHR2	9311601	9312503	yes	yes
CHR2	9556563	9557633	yes	yes
CHR2	9640122	9640601	yes	yes
CHR2	10149038	10149370	yes	yes
CHR2	10278028	10278280	yes	yes
CHR2	10289628	10290227	yes	yes
CHR2	10521424	10521687	yes	yes
CHR2	11544526	11544965	yes	yes
CHR2	11964125	11964878	yes	yes
CHR2	12413753	12414098	yes	yes
CHR2	12571461	12572251	yes	yes
CHR2	12708459	12708747	yes	yes
CHR2	12736525	12736744	yes	yes
CHR2	13031468	13032672	yes	yes
CHR2	13492891	13493313	yes	yes
CHR2	14164094	14164311	yes	yes
CHR2	14858781	14859362	yes	yes
CHR2	14906641	14907651	yes	yes
CHR2	15134656	15134759	yes	yes
CHR2	15821492	15821944	yes	yes
CHR2	16537493	16537936	yes	yes
CHR3	2031266	2031426	yes	yes
CHR3	2063283	2063473	yes	yes
CHR3	3204757	3205398	yes	yes
CHR3	3685671	3686192	yes	yes
CHR3	3837061	3837954	yes	yes
CHR3	5156982	5157330	yes	yes
CHR3	5672137	5672314	yes	yes
CHR3	7772657	7772890	yes	yes
CHR3	7800116	7800268	yes	yes
CHR3	7880742	7881008	yes	yes
CHR3	8758751	8758974	yes	yes
CHR3	8849355	8849947	yes	yes
CHR3	8858076	8858260	yes	yes
CHR3	8983967	8984088	yes	yes
CHR3	9130682	9130836	yes	yes
CHR3	9225198	9225307	yes	yes
CHR3	9231413	9231903	yes	yes
CHR3	9618601	9619189	yes	yes
CHR3	9729231	9730115	yes	yes
CHR3	9732207	9732478	yes	yes
CHR3	9868948	9869538	yes	yes
CHR3	10005219	10005429	yes	yes
CHR3	10038644	10039179	yes	yes
CHR3	10215657	10215764	yes	yes
CHR3	10234621	10234741	yes	yes
CHR3	10359281	10360059	yes	yes
CHR3	10644755	10646295	yes	yes
CHR3	10719175	10720189	yes	yes
CHR3	10781753	10782033	yes	yes
CHR3	10854087	10854883	yes	yes
CHR3	11115875	11116000	yes	yes
CHR3	11178810	11178925	yes	yes
CHR3	11179265	11179615	yes	yes
CHR3	11180085	11180420	yes	yes
CHR3	11197492	11198149	yes	yes
CHR3	11232531	11233931	yes	yes
CHR3	11434533	11434751	yes	yes
CHR3	11441960	11444848	yes	yes
CHR3	11457990	11459475	yes	yes
CHR3	11475639	11477256	yes	yes
CHR3	11513507	11514038	yes	yes
CHR3	11519164	11519303	yes	yes
CHR3	11521615	11521893	yes	yes
CHR3	11562659	11562786	yes	yes
CHR3	11565980	11566295	yes	yes
CHR3	11569631	11569794	yes	yes
CHR3	11577817	11578200	yes	yes
CHR3	11596683	11596966	yes	yes
CHR3	11613398	11613565	yes	yes
CHR3	11620010	11620124	yes	yes
CHR3	11620868	11621601	yes	yes
CHR3	11629242	11629402	yes	yes
CHR3	11642692	11644829	yes	yes
CHR3	11664975	11665404	yes	yes
CHR3	11668486	11668591	yes	yes
CHR3	11669420	11669703	yes	yes
CHR3	11676000	11676421	yes	yes
CHR3	11678720	11679103	yes	yes
CHR3	11683608	11683994	yes	yes
CHR3	11689784	11690040	yes	yes
CHR3	11732933	11733079	yes	yes
CHR3	11735431	11735598	yes	yes
CHR3	11775272	11775472	yes	yes
CHR3	11776921	11777105	yes	yes
CHR3	11841243	11841495	yes	yes
CHR3	11854097	11854542	yes	yes
CHR3	11878583	11878689	yes	yes
CHR3	11920486	11920643	yes	yes
CHR3	11934768	11934941	yes	yes
CHR3	11944624	11945515	yes	yes
CHR3	11947844	11949100	yes	yes
CHR3	12060597	12061354	yes	yes
CHR3	12066315	12066471	yes	yes
CHR3	12080968	12081078	yes	yes
CHR3	12083148	12083518	yes	yes
CHR3	12087230	12088291	yes	yes
CHR3	12095007	12096357	yes	yes
CHR3	12145657	12146057	yes	yes
CHR3	12155075	12155779	yes	yes
CHR3	12179563	12179752	yes	yes
CHR3	12234727	12235370	yes	yes
CHR3	12235692	12236990	yes	yes
CHR3	12255300	12255616	yes	yes
CHR3	12267691	12270366	yes	yes
CHR3	12271248	12271465	yes	yes
CHR3	12273061	12273444	yes	yes
CHR3	12275072	12276339	yes	yes
CHR3	12309392	12310185	yes	yes
CHR3	12312062	12312784	yes	yes
CHR3	12326880	12327305	yes	yes
CHR3	12333182	12333762	yes	yes
CHR3	12384396	12385133	yes	yes
CHR3	12399421	12399703	yes	yes
CHR3	12418140	12418344	yes	yes
CHR3	12421145	12421261	yes	yes
CHR3	12445694	12445935	yes	yes
CHR3	12461513	12461760	yes	yes
CHR3	12469077	12469442	yes	yes
CHR3	12477566	12477789	yes	yes
CHR3	12604179	12605306	yes	yes
CHR3	12606473	12606807	yes	yes
CHR3	12608222	12608495	yes	yes
CHR3	12622067	12622289	yes	yes
CHR3	12627105	12627812	yes	yes
CHR3	12629249	12629457	yes	yes
CHR3	12640541	12640940	yes	yes
CHR3	12649113	12649623	yes	yes
CHR3	12702125	12702247	yes	yes
CHR3	12730352	12731969	yes	yes
CHR3	12740664	12741266	yes	yes
CHR3	12770759	12770878	yes	yes
CHR3	12779800	12780061	yes	yes
CHR3	12820278	12820684	yes	yes
CHR3	12832754	12834202	yes	yes
CHR3	12835235	12836218	yes	yes
CHR3	12876077	12876674	yes	yes
CHR3	12877411	12881102	yes	yes
CHR3	12890619	12891173	yes	yes
CHR3	12913199	12913722	yes	yes
CHR3	12915232	12915347	yes	yes
CHR3	12919599	12920046	yes	yes
CHR3	12927728	12927925	yes	yes
CHR3	12981116	12981528	yes	yes
CHR3	12996463	12996845	yes	yes
CHR3	12998910	13000352	yes	yes
CHR3	13000946	13001481	yes	yes
CHR3	13037267	13040758	yes	yes
CHR3	13041074	13041693	yes	yes
CHR3	13068545	13068705	yes	yes
CHR3	13131903	13132062	yes	yes
CHR3	13136913	13137178	yes	yes
CHR3	13143015	13143136	yes	yes
CHR3	13144832	13145315	yes	yes
CHR3	13162901	13163036	yes	yes
CHR3	13165249	13165601	yes	yes
CHR3	13201490	13201697	yes	yes
CHR3	13218373	13220014	yes	yes
CHR3	13223707	13226191	yes	yes
CHR3	13265601	13267513	yes	yes
CHR3	13305318	13305464	yes	yes
CHR3	13305970	13306497	yes	yes
CHR3	13323635	13323749	yes	yes
CHR3	13335695	13336066	yes	yes
CHR3	13336573	13336723	yes	yes
CHR3	13337166	13337432	yes	yes
CHR3	13341991	13342153	yes	yes
CHR3	13349946	13350580	yes	yes
CHR3	13356441	13356542	yes	yes
CHR3	13374117	13374333	yes	yes
CHR3	13384264	13385039	yes	yes
CHR3	13387358	13387589	yes	yes
CHR3	13449374	13450088	yes	yes
CHR3	13452411	13453184	yes	yes
CHR3	13457548	13457752	yes	yes
CHR3	13467217	13467370	yes	yes
CHR3	13513580	13513766	yes	yes
CHR3	13524331	13524528	yes	yes
CHR3	13535915	13539256	yes	yes
CHR3	13539707	13540155	yes	yes
CHR3	13540559	13541974	yes	yes
CHR3	13560159	13560296	yes	yes
CHR3	13561418	13561797	yes	yes
CHR3	13573579	13574056	yes	yes
CHR3	13957130	13957366	yes	yes
CHR3	13983474	13983772	yes	yes
CHR3	13984721	13985227	yes	yes
CHR3	13985611	13985857	yes	yes
CHR3	13990214	13990380	yes	yes
CHR3	14057924	14058078	yes	yes
CHR3	14084314	14084491	yes	yes
CHR3	14274435	14275076	yes	yes
CHR3	14276690	14277013	yes	yes
CHR3	14280660	14282129	yes	yes
CHR3	14284709	14285249	yes	yes
CHR3	14287567	14288306	yes	yes
CHR3	14289526	14290333	yes	yes
CHR3	14369586	14369827	yes	yes
CHR3	14373237	14373885	yes	yes
CHR3	14388445	14389186	yes	yes
CHR3	14459909	14460122	yes	yes
CHR3	14471218	14471960	yes	yes
CHR3	14480810	14481246	yes	yes
CHR3	14490334	14490665	yes	yes
CHR3	14517595	14517745	yes	yes
CHR3	14518850	14518952	yes	yes
CHR3	14531472	14531652	yes	yes
CHR3	14534499	14534618	yes	yes
CHR3	14536905	14537145	yes	yes
CHR3	14576658	14577211	yes	yes
CHR3	14589498	14589834	yes	yes
CHR3	14612893	14613183	yes	yes
CHR3	14627172	14628101	yes	yes
CHR3	14630576	14630983	yes	yes
CHR3	14647353	14647638	yes	yes
CHR3	14683591	14686209	yes	yes
CHR3	14698447	14699133	yes	yes
CHR3	14711309	14711460	yes	yes
CHR3	14723564	14723666	yes	yes
CHR3	14743533	14743878	yes	yes
CHR3	14763092	14763728	yes	yes
CHR3	14773869	14774413	yes	yes
CHR3	14785403	14785897	yes	yes
CHR3	14882682	14883484	yes	yes
CHR3	14890378	14891015	yes	yes
CHR3	14898998	14899540	yes	yes
CHR3	14901572	14901819	yes	yes
CHR3	14916757	14916894	yes	yes
CHR3	14938900	14939230	yes	yes
CHR3	14967118	14967232	yes	yes
CHR3	14969201	14969545	yes	yes
CHR3	14975281	14975921	yes	yes
CHR3	15008742	15010292	yes	yes
CHR3	15011346	15011588	yes	yes
CHR3	15027138	15027398	yes	yes
CHR3	15052176	15052663	yes	yes
CHR3	15085103	15085487	yes	yes
CHR3	15087844	15088039	yes	yes
CHR3	15097975	15098177	yes	yes
CHR3	15100257	15100404	yes	yes
CHR3	15131770	15133607	yes	yes
CHR3	15270888	15271524	yes	yes
CHR3	15282023	15282340	yes	yes
CHR3	15282848	15285912	yes	yes
CHR3	15286422	15286841	yes	yes
CHR3	15289072	15289611	yes	yes
CHR3	15289915	15290389	yes	yes
CHR3	15290759	15291737	yes	yes
CHR3	15294760	15296870	yes	yes
CHR3	15312401	15312649	yes	yes
CHR3	15325758	15326338	yes	yes
CHR3	15393907	15394117	yes	yes
CHR3	15395154	15396980	yes	yes
CHR3	15407979	15408230	yes	yes
CHR3	15412178	15412287	yes	yes
CHR3	15416061	15416206	yes	yes
CHR3	15442295	15442491	yes	yes
CHR3	15446816	15447715	yes	yes
CHR3	15454219	15455540	yes	yes
CHR3	15469506	15470826	yes	yes
CHR3	15500299	15500842	yes	yes
CHR3	15591164	15591506	yes	yes
CHR3	15628263	15629360	yes	yes
CHR3	15729297	15730055	yes	yes
CHR3	15735693	15737203	yes	yes
CHR3	15794402	15794585	yes	yes
CHR3	15805923	15806030	yes	yes
CHR3	15831293	15831967	yes	yes
CHR3	15917242	15917599	yes	yes
CHR3	15964001	15964146	yes	yes
CHR3	16104901	16105259	yes	yes
CHR3	16201554	16202648	yes	yes
CHR3	16333632	16333765	yes	yes
CHR3	16943038	16943548	yes	yes
CHR3	17120986	17121172	yes	yes
CHR3	17205372	17206158	yes	yes
CHR3	17408869	17409537	yes	yes
CHR3	17414084	17414346	yes	yes
CHR3	17863825	17864983	yes	yes
CHR3	17928456	17929394	yes	yes
CHR3	18111635	18112071	yes	yes
CHR3	18747182	18747834	yes	yes
CHR3	18799522	18799963	yes	yes
CHR3	18927267	18927633	yes	yes
CHR3	19635110	19635307	yes	yes
CHR3	19667707	19669297	yes	yes
CHR3	20664414	20664629	yes	yes
CHR3	20957738	20958072	yes	yes
CHR3	21325744	21325853	yes	yes
CHR3	22465156	22465297	yes	yes
CHR3	22524592	22524719	yes	yes
CHR3	22585595	22585899	yes	yes
CHR3	22748173	22748376	yes	yes
CHR3	23085701	23085821	yes	yes
CHR4	144728	145153	yes	yes
CHR4	298513	298734	yes	yes
CHR4	663839	664681	yes	yes
CHR4	665314	665482	yes	yes
CHR4	944772	945214	yes	yes
CHR4	963687	963800	yes	yes
CHR4	1027327	1027486	yes	yes
CHR4	1315270	1315423	yes	yes
CHR4	1564760	1565964	yes	yes
CHR4	1615703	1616648	yes	yes
CHR4	1616952	1617815	yes	yes
CHR4	1628933	1629514	yes	yes
CHR4	1638229	1638354	yes	yes
CHR4	1652633	1652914	yes	yes
CHR4	1654651	1655198	yes	yes
CHR4	1664928	1665029	yes	yes
CHR4	1703972	1704334	yes	yes
CHR4	1742583	1743013	yes	yes
CHR4	1760836	1761432	yes	yes
CHR4	1766337	1767761	yes	yes
CHR4	1820326	1820635	yes	yes
CHR4	1822809	1823985	yes	yes
CHR4	1835737	1836066	yes	yes
CHR4	1850991	1851181	yes	yes
CHR4	1855485	1855674	yes	yes
CHR4	1902043	1902443	yes	yes
CHR4	1903621	1904011	yes	yes
CHR4	1913587	1914160	yes	yes
CHR4	1926444	1926637	yes	yes
CHR4	1937971	1938796	yes	yes
CHR4	1966068	1966470	yes	yes
CHR4	1976750	1977113	yes	yes
CHR4	1983389	1983531	yes	yes
CHR4	1983871	1984126	yes	yes
CHR4	1989771	1989918	yes	yes
CHR4	1995852	1995991	yes	yes
CHR4	2043018	2043155	yes	yes
CHR4	2043492	2043792	yes	yes
CHR4	2044775	2044997	yes	yes
CHR4	2070709	2071049	yes	yes
CHR4	2080806	2081212	yes	yes
CHR4	2101048	2101885	yes	yes
CHR4	2103853	2106436	yes	yes
CHR4	2142141	2142658	yes	yes
CHR4	2144911	2146123	yes	yes
CHR4	2147275	2147591	yes	yes
CHR4	2176056	2176653	yes	yes
CHR4	2186482	2186662	yes	yes
CHR4	2190301	2191544	yes	yes
CHR4	2253702	2253803	yes	yes
CHR4	2277793	2277973	yes	yes
CHR4	2286578	2287016	yes	yes
CHR4	2300663	2300766	yes	yes
CHR4	2316246	2317687	yes	yes
CHR4	2335514	2335831	yes	yes
CHR4	2596428	2596870	yes	yes
CHR4	2604131	2604802	yes	yes
CHR4	2641858	2643431	yes	yes
CHR4	2648627	2649455	yes	yes
CHR4	2663399	2663783	yes	yes
CHR4	2689452	2689845	yes	yes
CHR4	2696709	2696873	yes	yes
CHR4	2789316	2789559	yes	yes
CHR4	2789979	2790712	yes	yes
CHR4	2813031	2813756	yes	yes
CHR4	2842214	2842855	yes	yes
CHR4	2843865	2844365	yes	yes
CHR4	2845018	2845467	yes	yes
CHR4	2846196	2846355	yes	yes
CHR4	2849621	2850492	yes	yes
CHR4	2861765	2862909	yes	yes
CHR4	2901205	2901330	yes	yes
CHR4	2903490	2903698	yes	yes
CHR4	2998686	2998817	yes	yes
CHR4	3124934	3125035	yes	yes
CHR4	3299652	3300323	yes	yes
CHR4	3308698	3309063	yes	yes
CHR4	3329936	3330663	yes	yes
CHR4	3369450	3370475	yes	yes
CHR4	3371358	3371663	yes	yes
CHR4	3407205	3407466	yes	yes
CHR4	3417949	3418080	yes	yes
CHR4	3418519	3418794	yes	yes
CHR4	3429587	3430683	yes	yes
CHR4	3514046	3514441	yes	yes
CHR4	3517675	3517940	yes	yes
CHR4	3597304	3597564	yes	yes
CHR4	3603187	3604213	yes	yes
CHR4	3670772	3671039	yes	yes
CHR4	3719572	3719744	yes	yes
CHR4	3726348	3726798	yes	yes
CHR4	3729057	3729159	yes	yes
CHR4	3729721	3730436	yes	yes
CHR4	3757721	3758227	yes	yes
CHR4	3775567	3776139	yes	yes
CHR4	3801432	3802885	yes	yes
CHR4	3807228	3807386	yes	yes
CHR4	3807960	3808838	yes	yes
CHR4	3809449	3810145	yes	yes
CHR4	3816143	3816278	yes	yes
CHR4	3816806	3817263	yes	yes
CHR4	3818492	3818792	yes	yes
CHR4	3819615	3820575	yes	yes
CHR4	3822774	3823702	yes	yes
CHR4	3853667	3853768	yes	yes
CHR4	3879129	3879402	yes	yes
CHR4	3892569	3892835	yes	yes
CHR4	3949202	3949788	yes	yes
CHR4	4085476	4085829	yes	yes
CHR4	4106580	4108417	yes	yes
CHR4	4109672	4109841	yes	yes
CHR4	4129040	4129346	yes	yes
CHR4	4131147	4131524	yes	yes
CHR4	4131977	4132255	yes	yes
CHR4	4155183	4155372	yes	yes
CHR4	4163269	4163791	yes	yes
CHR4	4165842	4166378	yes	yes
CHR4	4167930	4168204	yes	yes
CHR4	4223491	4227041	yes	yes
CHR4	4230217	4231168	yes	yes
CHR4	4234611	4234814	yes	yes
CHR4	4264418	4265240	yes	yes
CHR4	4293354	4294183	yes	yes
CHR4	4332841	4333145	yes	yes
CHR4	4398862	4399519	yes	yes
CHR4	4456467	4456717	yes	yes
CHR4	4588401	4588805	yes	yes
CHR4	4589207	4590757	yes	yes
CHR4	4591595	4592215	yes	yes
CHR4	4605155	4606683	yes	yes
CHR4	4614598	4615042	yes	yes
CHR4	4618484	4618885	yes	yes
CHR4	4631227	4631932	yes	yes
CHR4	4634995	4635190	yes	yes
CHR4	4635860	4636136	yes	yes
CHR4	4637794	4638314	yes	yes
CHR4	4639247	4640492	yes	yes
CHR4	4665717	4665882	yes	yes
CHR4	4751388	4751578	yes	yes
CHR4	4784245	4785072	yes	yes
CHR4	4788619	4789617	yes	yes
CHR4	4818018	4818715	yes	yes
CHR4	4832945	4834093	yes	yes
CHR4	4838871	4839092	yes	yes
CHR4	4857511	4857821	yes	yes
CHR4	4862321	4863112	yes	yes
CHR4	4889740	4890394	yes	yes
CHR4	4917265	4917867	yes	yes
CHR4	4918187	4918287	yes	yes
CHR4	4924124	4924337	yes	yes
CHR4	4934235	4934613	yes	yes
CHR4	4950535	4951495	yes	yes
CHR4	4955094	4956103	yes	yes
CHR4	4970426	4970687	yes	yes
CHR4	4983735	4983883	yes	yes
CHR4	5002871	5003048	yes	yes
CHR4	5011055	5011713	yes	yes
CHR4	5015471	5015658	yes	yes
CHR4	5128978	5129079	yes	yes
CHR4	5214012	5214191	yes	yes
CHR4	5223977	5224674	yes	yes
CHR4	5259105	5259276	yes	yes
CHR4	5261636	5261886	yes	yes
CHR4	5264938	5265181	yes	yes
CHR4	5267436	5268628	yes	yes
CHR4	5271564	5271688	yes	yes
CHR4	5371656	5371767	yes	yes
CHR4	5389051	5389265	yes	yes
CHR4	5420883	5421376	yes	yes
CHR4	5476863	5477269	yes	yes
CHR4	5478051	5479547	yes	yes
CHR4	5480257	5480403	yes	yes
CHR4	5487781	5488002	yes	yes
CHR4	5493952	5494269	yes	yes
CHR4	5514261	5514592	yes	yes
CHR4	5523743	5523850	yes	yes
CHR4	5524684	5525220	yes	yes
CHR4	5529191	5529655	yes	yes
CHR4	5531391	5532022	yes	yes
CHR4	5564315	5564628	yes	yes
CHR4	5591195	5591561	yes	yes
CHR4	5627376	5627567	yes	yes
CHR4	5628117	5629012	yes	yes
CHR4	5650595	5651094	yes	yes
CHR4	5653157	5653695	yes	yes
CHR4	5665702	5665933	yes	yes
CHR4	5691156	5691426	yes	yes
CHR4	5794053	5794429	yes	yes
CHR4	5857436	5857693	yes	yes
CHR4	5892093	5892801	yes	yes
CHR4	5901005	5901262	yes	yes
CHR4	5936864	5937909	yes	yes
CHR4	5947701	5948371	yes	yes
CHR4	5954977	5955237	yes	yes
CHR4	5977367	5980982	yes	yes
CHR4	5997234	5999058	yes	yes
CHR4	5999563	6000270	yes	yes
CHR4	6001791	6003617	yes	yes
CHR4	6004032	6005892	yes	yes
CHR4	6006345	6007324	yes	yes
CHR4	6112863	6115633	yes	yes
CHR4	6166504	6169406	yes	yes
CHR4	6206052	6206878	yes	yes
CHR4	6211506	6211898	yes	yes
CHR4	6212270	6212553	yes	yes
CHR4	6342567	6343231	yes	yes
CHR4	6411849	6412201	yes	yes
CHR4	6579278	6579593	yes	yes
CHR4	6597761	6597973	yes	yes
CHR4	7213939	7214719	yes	yes
CHR4	7550835	7550954	yes	yes
CHR4	7557951	7558786	yes	yes
CHR4	7624898	7625803	yes	yes
CHR4	8088161	8088288	yes	yes
CHR4	8591602	8592821	yes	yes
CHR4	8772255	8772981	yes	yes
CHR4	9074484	9074879	yes	yes
CHR4	9078904	9079472	yes	yes
CHR4	9188878	9189100	yes	yes
CHR4	9338788	9339232	yes	yes
CHR4	9370586	9370742	yes	yes
CHR4	9521358	9524288	yes	yes
CHR4	9541446	9542801	yes	yes
CHR4	9801097	9802045	yes	yes
CHR4	9927916	9928036	yes	yes
CHR4	9954613	9955353	yes	yes
CHR4	10156899	10157042	yes	yes
CHR4	10492653	10493142	yes	yes
CHR4	10543365	10545096	yes	yes
CHR4	10648857	10649300	yes	yes
CHR4	10901239	10901450	yes	yes
CHR4	11147722	11149303	yes	yes
CHR4	11655256	11655363	yes	yes
CHR4	11765074	11765221	yes	yes
CHR4	11828594	11829882	yes	yes
CHR4	11946193	11946646	yes	yes
CHR4	12008185	12008612	yes	yes
CHR4	12485653	12486005	yes	yes
CHR4	15626687	15627662	yes	yes
CHR4	17713923	17714023	yes	yes
CHR5	491778	492067	yes	yes
CHR5	660572	661187	yes	yes
CHR5	2296455	2296825	yes	yes
CHR5	2791305	2791409	yes	yes
CHR5	5281694	5281997	yes	yes
CHR5	5646265	5646845	yes	yes
CHR5	6438828	6439510	yes	yes
CHR5	7412773	7414988	yes	yes
CHR5	8045700	8045803	yes	yes
CHR5	8272683	8273031	yes	yes
CHR5	8728489	8728795	yes	yes
CHR5	9008187	9008950	yes	yes
CHR5	9061171	9061734	yes	yes
CHR5	9179762	9180462	yes	yes
CHR5	9708725	9709140	yes	yes
CHR5	9756738	9760572	yes	yes
CHR5	9806709	9806841	yes	yes
CHR5	9968479	9968603	yes	yes
CHR5	10056201	10056335	yes	yes
CHR5	10075063	10075218	yes	yes
CHR5	10075527	10076017	yes	yes
CHR5	10088484	10089112	yes	yes
CHR5	10142542	10143383	yes	yes
CHR5	10169564	10170064	yes	yes
CHR5	10170524	10170852	yes	yes
CHR5	10222139	10222720	yes	yes
CHR5	10224841	10225952	yes	yes
CHR5	10231136	10232298	yes	yes
CHR5	10387211	10387456	yes	yes
CHR5	10387872	10388547	yes	yes
CHR5	10405993	10406896	yes	yes
CHR5	10410104	10410403	yes	yes
CHR5	10415133	10415920	yes	yes
CHR5	10416730	10417799	yes	yes
CHR5	10418627	10418798	yes	yes
CHR5	10419206	10419308	yes	yes
CHR5	10425340	10425530	yes	yes
CHR5	10440155	10440595	yes	yes
CHR5	10442659	10442853	yes	yes
CHR5	10467981	10468289	yes	yes
CHR5	10502791	10502965	yes	yes
CHR5	10533468	10534578	yes	yes
CHR5	10560170	10561273	yes	yes
CHR5	10561602	10566492	yes	yes
CHR5	10586955	10587277	yes	yes
CHR5	10596687	10597712	yes	yes
CHR5	10598724	10598875	yes	yes
CHR5	10602241	10602703	yes	yes
CHR5	10603470	10604665	yes	yes
CHR5	10607001	10607113	yes	yes
CHR5	10611757	10612077	yes	yes
CHR5	10620171	10620849	yes	yes
CHR5	10667987	10668158	yes	yes
CHR5	10685644	10686086	yes	yes
CHR5	10692788	10692924	yes	yes
CHR5	10695920	10696214	yes	yes
CHR5	10696601	10698855	yes	yes
CHR5	10699255	10700488	yes	yes
CHR5	10701411	10701866	yes	yes
CHR5	10759029	10759410	yes	yes
CHR5	10779769	10780215	yes	yes
CHR5	10807258	10808705	yes	yes
CHR5	10814761	10816656	yes	yes
CHR5	10820818	10823401	yes	yes
CHR5	10829736	10830758	yes	yes
CHR5	10832360	10832638	yes	yes
CHR5	10833032	10833514	yes	yes
CHR5	10843770	10844384	yes	yes
CHR5	10884239	10884576	yes	yes
CHR5	10892212	10893517	yes	yes
CHR5	10895645	10898005	yes	yes
CHR5	10900213	10902355	yes	yes
CHR5	10903246	10903587	yes	yes
CHR5	10905721	10906468	yes	yes
CHR5	10911789	10913203	yes	yes
CHR5	10914039	10915719	yes	yes
CHR5	10947799	10947952	yes	yes
CHR5	10963410	10963871	yes	yes
CHR5	10966213	10966316	yes	yes
CHR5	10973494	10973701	yes	yes
CHR5	10980728	10981582	yes	yes
CHR5	10987887	10990332	yes	yes
CHR5	11007564	11008768	yes	yes
CHR5	11009447	11010352	yes	yes
CHR5	11010931	11011624	yes	yes
CHR5	11012426	11012593	yes	yes
CHR5	11031472	11031988	yes	yes
CHR5	11035141	11035335	yes	yes
CHR5	11037248	11037510	yes	yes
CHR5	11063554	11064059	yes	yes
CHR5	11064584	11065100	yes	yes
CHR5	11066313	11066597	yes	yes
CHR5	11066923	11067078	yes	yes
CHR5	11193532	11193661	yes	yes
CHR5	11220880	11221139	yes	yes
CHR5	11279217	11280303	yes	yes
CHR5	11280716	11281983	yes	yes
CHR5	11288666	11289159	yes	yes
CHR5	11290485	11290873	yes	yes
CHR5	11292659	11293040	yes	yes
CHR5	11301197	11301316	yes	yes
CHR5	11301831	11301931	yes	yes
CHR5	11415699	11417474	yes	yes
CHR5	11418241	11418603	yes	yes
CHR5	11419876	11421032	yes	yes
CHR5	11492663	11493261	yes	yes
CHR5	11493940	11494776	yes	yes
CHR5	11495146	11495417	yes	yes
CHR5	11500771	11500937	yes	yes
CHR5	11538431	11539407	yes	yes
CHR5	11540361	11540950	yes	yes
CHR5	11546235	11548019	yes	yes
CHR5	11635169	11636832	yes	yes
CHR5	11663961	11664314	yes	yes
CHR5	11738817	11738919	yes	yes
CHR5	12075269	12076682	yes	yes
CHR5	12093658	12094941	yes	yes
CHR5	12182875	12184326	yes	yes
CHR5	12208313	12208623	yes	yes
CHR5	12268084	12268682	yes	yes
CHR5	12277601	12278023	yes	yes
CHR5	12285922	12286161	yes	yes
CHR5	12324888	12325828	yes	yes
CHR5	12381663	12381786	yes	yes
CHR5	12384495	12384640	yes	yes
CHR5	12387641	12387768	yes	yes
CHR5	12390063	12390363	yes	yes
CHR5	12390727	12395318	yes	yes
CHR5	12424572	12424675	yes	yes
CHR5	12426406	12427160	yes	yes
CHR5	12436733	12437324	yes	yes
CHR5	12440874	12441181	yes	yes
CHR5	12446026	12446162	yes	yes
CHR5	12446739	12447078	yes	yes
CHR5	12457239	12457369	yes	yes
CHR5	12466528	12466651	yes	yes
CHR5	12467163	12467345	yes	yes
CHR5	12486417	12486597	yes	yes
CHR5	12511288	12511608	yes	yes
CHR5	12541661	12541971	yes	yes
CHR5	12544040	12545098	yes	yes
CHR5	12781231	12781845	yes	yes
CHR5	12912803	12913853	yes	yes
CHR5	12981758	12982142	yes	yes
CHR5	13049637	13051845	yes	yes
CHR5	13057658	13061026	yes	yes
CHR5	13097118	13097734	yes	yes
CHR5	13112864	13113147	yes	yes
CHR5	13137827	13138912	yes	yes
CHR5	13212503	13213652	yes	yes
CHR5	13215494	13215689	yes	yes
CHR5	13228620	13228965	yes	yes
CHR5	13345451	13347998	yes	yes
CHR5	13384010	13384799	yes	yes
CHR5	13388568	13390270	yes	yes
CHR5	13438924	13439197	yes	yes
CHR5	13439514	13439993	yes	yes
CHR5	13440343	13440450	yes	yes
CHR5	13442721	13443200	yes	yes
CHR5	13444854	13445082	yes	yes
CHR5	13445955	13446623	yes	yes
CHR5	13450288	13450394	yes	yes
CHR5	13454062	13454186	yes	yes
CHR5	13456311	13456418	yes	yes
CHR5	13456899	13457127	yes	yes
CHR5	13458318	13458442	yes	yes
CHR5	13459771	13460093	yes	yes
CHR5	13461547	13462020	yes	yes
CHR5	13502116	13502508	yes	yes
CHR5	13505850	13507344	yes	yes
CHR5	13511733	13512937	yes	yes
CHR5	13518699	13518926	yes	yes
CHR5	13534652	13535270	yes	yes
CHR5	13555283	13555714	yes	yes
CHR5	13566384	13566970	yes	yes
CHR5	13695776	13695964	yes	yes
CHR5	13744055	13744197	yes	yes
CHR5	13793154	13794006	yes	yes
CHR5	13795032	13796540	yes	yes
CHR5	13827281	13828659	yes	yes
CHR5	13869307	13869847	yes	yes
CHR5	13926981	13928532	yes	yes
CHR5	13943216	13943759	yes	yes
CHR5	13967251	13967468	yes	yes
CHR5	13989795	13989906	yes	yes
CHR5	14012241	14014049	yes	yes
CHR5	14044001	14044831	yes	yes
CHR5	14057733	14057884	yes	yes
CHR5	14098037	14099104	yes	yes
CHR5	14100513	14101251	yes	yes
CHR5	14103095	14104592	yes	yes
CHR5	14164561	14166475	yes	yes
CHR5	14169487	14170457	yes	yes
CHR5	14173776	14173993	yes	yes
CHR5	14208517	14208781	yes	yes
CHR5	14229572	14229922	yes	yes
CHR5	14308695	14311559	yes	yes
CHR5	14316161	14316345	yes	yes
CHR5	14317005	14317142	yes	yes
CHR5	14470436	14470538	yes	yes
CHR5	14508820	14509320	yes	yes
CHR5	14548523	14549472	yes	yes
CHR5	14594432	14594813	yes	yes
CHR5	14627249	14627958	yes	yes
CHR5	14676919	14677596	yes	yes
CHR5	14937454	14937776	yes	yes
CHR5	15140003	15141592	yes	yes
CHR5	15430637	15431927	yes	yes
CHR5	15435941	15436041	yes	yes
CHR5	16204195	16204877	yes	yes
CHR5	16320978	16321654	yes	yes
CHR5	16585695	16586369	yes	yes
CHR5	17089951	17090204	yes	yes
CHR5	17210325	17210752	yes	yes
CHR5	17366996	17367110	yes	yes
CHR5	17558163	17558418	yes	yes
CHR5	18124815	18125878	yes	yes
CHR5	18127791	18128062	yes	yes
CHR5	18420447	18420790	yes	yes
CHR5	20313960	20315066	yes	yes
CHR5	20399764	20400313	yes	yes
CHR5	20556546	20556870	yes	yes
CHR5	20631029	20631484	yes	yes
CHR5	21096245	21096510	yes	yes
CHR5	21192926	21193189	yes	yes
CHR5	21488316	21488417	yes	yes
CHR5	21833201	21833497	yes	yes
CHR5	22094103	22094399	yes	yes
CHR5	24018053	24018539	yes	yes
CHR5	24029495	24030207	yes	yes
CHR5	24345067	24346694	yes	yes
CHR5	24530638	24531243	yes	yes
CHR5	24658523	24658765	yes	yes
CHR5	26787926	26788071	yes	yes
CHR1	433588	433771	no	yes
CHR1	550627	550919	no	yes
CHR1	587403	587622	no	yes
CHR1	715261	715406	no	yes
CHR1	1617481	1618000	no	yes
CHR1	2208529	2208769	no	yes
CHR1	2593035	2593136	no	yes
CHR1	2795198	2795506	no	yes
CHR1	2796750	2797021	no	yes
CHR1	3339964	3340242	no	yes
CHR1	3344461	3344686	no	yes
CHR1	3345044	3345155	no	yes
CHR1	3546771	3547286	no	yes
CHR1	4284347	4284546	no	yes
CHR1	4505749	4505995	no	yes
CHR1	4506618	4506947	no	yes
CHR1	4583396	4583537	no	yes
CHR1	4787118	4787294	no	yes
CHR1	5693776	5693913	no	yes
CHR1	5798751	5799610	no	yes
CHR1	6235622	6235944	no	yes
CHR1	6250280	6250469	no	yes
CHR1	6372542	6372645	no	yes
CHR1	6426410	6426546	no	yes
CHR1	6574019	6575317	no	yes
CHR1	6704115	6704238	no	yes
CHR1	7356464	7356874	no	yes
CHR1	7358118	7358426	no	yes
CHR1	7359101	7359779	no	yes
CHR1	7364579	7365097	no	yes
CHR1	7528005	7528131	no	yes
CHR1	7976160	7976468	no	yes
CHR1	8035586	8036135	no	yes
CHR1	8204819	8205406	no	yes
CHR1	8645986	8648388	no	yes
CHR1	8648849	8649033	no	yes
CHR1	8992547	8992728	no	yes
CHR1	9310311	9310445	no	yes
CHR1	9335518	9335972	no	yes
CHR1	9572301	9574953	no	yes
CHR1	9708477	9708651	no	yes
CHR1	9746436	9746641	no	yes
CHR1	9761352	9761472	no	yes
CHR1	9915255	9915842	no	yes
CHR1	9916270	9916493	no	yes
CHR1	9925345	9926205	no	yes
CHR1	9929298	9929599	no	yes
CHR1	10005759	10006010	no	yes
CHR1	10351507	10351649	no	yes
CHR1	10421557	10421730	no	yes
CHR1	10533279	10533477	no	yes
CHR1	10540193	10540485	no	yes
CHR1	10920860	10921188	no	yes
CHR1	11027248	11028920	no	yes
CHR1	11065491	11065689	no	yes
CHR1	11241749	11242017	no	yes
CHR1	11331665	11331931	no	yes
CHR1	11365949	11366650	no	yes
CHR1	11488914	11489202	no	yes
CHR1	11586096	11586304	no	yes
CHR1	11692167	11693452	no	yes
CHR1	11826281	11826780	no	yes
CHR1	11861215	11861927	no	yes
CHR1	11871512	11871658	no	yes
CHR1	11890420	11890994	no	yes
CHR1	12376998	12377166	no	yes
CHR1	12402016	12402345	no	yes
CHR1	12554728	12555259	no	yes
CHR1	12573103	12573682	no	yes
CHR1	12675169	12675369	no	yes
CHR1	12728701	12731016	no	yes
CHR1	12738351	12739392	no	yes
CHR1	12739849	12740012	no	yes
CHR1	12755045	12755296	no	yes
CHR1	12756797	12757165	no	yes
CHR1	12777124	12777556	no	yes
CHR1	12782483	12784320	no	yes
CHR1	12794137	12794674	no	yes
CHR1	12818883	12819284	no	yes
CHR1	12828134	12829041	no	yes
CHR1	12831266	12833360	no	yes
CHR1	12848372	12848743	no	yes
CHR1	12915965	12916189	no	yes
CHR1	12922189	12923555	no	yes
CHR1	12925976	12927411	no	yes
CHR1	12963605	12964050	no	yes
CHR1	12983083	12983747	no	yes
CHR1	12996337	12996751	no	yes
CHR1	13005406	13005569	no	yes
CHR1	13023729	13024251	no	yes
CHR1	13134586	13134886	no	yes
CHR1	13139954	13140094	no	yes
CHR1	13147544	13147762	no	yes
CHR1	13178241	13178358	no	yes
CHR1	13192032	13192517	no	yes
CHR1	13240161	13240318	no	yes
CHR1	13334516	13334728	no	yes
CHR1	13349600	13349948	no	yes
CHR1	13384490	13384593	no	yes
CHR1	13391700	13391821	no	yes
CHR1	13418514	13418725	no	yes
CHR1	13427794	13427935	no	yes
CHR1	13463308	13463431	no	yes
CHR1	13473746	13474094	no	yes
CHR1	13493588	13493928	no	yes
CHR1	13502622	13502898	no	yes
CHR1	13503411	13504140	no	yes
CHR1	13604129	13604293	no	yes
CHR1	13614240	13614754	no	yes
CHR1	13616311	13617263	no	yes
CHR1	13623451	13624290	no	yes
CHR1	13707105	13707781	no	yes
CHR1	13733984	13734458	no	yes
CHR1	13736646	13736773	no	yes
CHR1	13746543	13746731	no	yes
CHR1	13749834	13750029	no	yes
CHR1	13754569	13754695	no	yes
CHR1	13756468	13756936	no	yes
CHR1	13765901	13766920	no	yes
CHR1	13767639	13768547	no	yes
CHR1	13862155	13863006	no	yes
CHR1	13874505	13875080	no	yes
CHR1	13891440	13892047	no	yes
CHR1	13892425	13892841	no	yes
CHR1	13927108	13927603	no	yes
CHR1	13984233	13984435	no	yes
CHR1	13987486	13989494	no	yes
CHR1	13993476	13993695	no	yes
CHR1	13994017	13995104	no	yes
CHR1	13996547	13996929	no	yes
CHR1	14005692	14006504	no	yes
CHR1	14040144	14040572	no	yes
CHR1	14041692	14042900	no	yes
CHR1	14047449	14048055	no	yes
CHR1	14061525	14061836	no	yes
CHR1	14071136	14071724	no	yes
CHR1	14096683	14096892	no	yes
CHR1	14152841	14153254	no	yes
CHR1	14155807	14156026	no	yes
CHR1	14184114	14184241	no	yes
CHR1	14188683	14188909	no	yes
CHR1	14301610	14301719	no	yes
CHR1	14603415	14603982	no	yes
CHR1	14861881	14862163	no	yes
CHR1	14915375	14915508	no	yes
CHR1	14916570	14916983	no	yes
CHR1	15004499	15005092	no	yes
CHR1	15057455	15058021	no	yes
CHR1	15059738	15059860	no	yes
CHR1	15627355	15627532	no	yes
CHR1	15628660	15628945	no	yes
CHR1	15629576	15629797	no	yes
CHR1	15632066	15632488	no	yes
CHR1	15644141	15644483	no	yes
CHR1	15644828	15646534	no	yes
CHR1	15653648	15653833	no	yes
CHR1	15680317	15680790	no	yes
CHR1	15728888	15730306	no	yes
CHR1	15754819	15754980	no	yes
CHR1	15805491	15805677	no	yes
CHR1	15808067	15808230	no	yes
CHR1	15810168	15810346	no	yes
CHR1	15856996	15857796	no	yes
CHR1	15860731	15861577	no	yes
CHR1	15878159	15880066	no	yes
CHR1	15907622	15909214	no	yes
CHR1	15950039	15950400	no	yes
CHR1	15960985	15961358	no	yes
CHR1	15961921	15962061	no	yes
CHR1	15967338	15967519	no	yes
CHR1	16010041	16010371	no	yes
CHR1	16036680	16036967	no	yes
CHR1	16052902	16053084	no	yes
CHR1	16058800	16059082	no	yes
CHR1	16064508	16064664	no	yes
CHR1	16065759	16066000	no	yes
CHR1	16084940	16085104	no	yes
CHR1	16197140	16197363	no	yes
CHR1	16260444	16260675	no	yes
CHR1	16261058	16261192	no	yes
CHR1	16262429	16262540	no	yes
CHR1	16264824	16265840	no	yes
CHR1	16285396	16285825	no	yes
CHR1	16290234	16290551	no	yes
CHR1	16290970	16292245	no	yes
CHR1	16306322	16306801	no	yes
CHR1	16319002	16319129	no	yes
CHR1	16324531	16325262	no	yes
CHR1	16366388	16366631	no	yes
CHR1	16439104	16439307	no	yes
CHR1	16451090	16452847	no	yes
CHR1	16453579	16455366	no	yes
CHR1	16502838	16503442	no	yes
CHR1	16507685	16508405	no	yes
CHR1	16535037	16536343	no	yes
CHR1	16595591	16596167	no	yes
CHR1	16664083	16664284	no	yes
CHR1	16672081	16672324	no	yes
CHR1	16673776	16674052	no	yes
CHR1	16674389	16674735	no	yes
CHR1	16683370	16683883	no	yes
CHR1	16686229	16686982	no	yes
CHR1	16719029	16719512	no	yes
CHR1	16744364	16744467	no	yes
CHR1	16754863	16755280	no	yes
CHR1	16766244	16766463	no	yes
CHR1	16770598	16770980	no	yes
CHR1	16853243	16853565	no	yes
CHR1	16866780	16867066	no	yes
CHR1	16886836	16887003	no	yes
CHR1	16903012	16903766	no	yes
CHR1	16949647	16949853	no	yes
CHR1	16988305	16988571	no	yes
CHR1	16998816	16999228	no	yes
CHR1	17030576	17030683	no	yes
CHR1	17041368	17041711	no	yes
CHR1	17102235	17102337	no	yes
CHR1	17197594	17197862	no	yes
CHR1	17214762	17215119	no	yes
CHR1	17274291	17274458	no	yes
CHR1	17300178	17300377	no	yes
CHR1	17305708	17305924	no	yes
CHR1	17325039	17325209	no	yes
CHR1	17376957	17377163	no	yes
CHR1	17386798	17387187	no	yes
CHR1	17412248	17412351	no	yes
CHR1	17591920	17592312	no	yes
CHR1	17594525	17594753	no	yes
CHR1	17611420	17611814	no	yes
CHR1	17641627	17641906	no	yes
CHR1	17667426	17668065	no	yes
CHR1	17725189	17725303	no	yes
CHR1	17863070	17863224	no	yes
CHR1	18003054	18003172	no	yes
CHR1	18015249	18015422	no	yes
CHR1	18019926	18020187	no	yes
CHR1	18093874	18095525	no	yes
CHR1	18152467	18152706	no	yes
CHR1	18158770	18158988	no	yes
CHR1	18289072	18289221	no	yes
CHR1	18338241	18338573	no	yes
CHR1	18437245	18438178	no	yes
CHR1	18848345	18848472	no	yes
CHR1	18854350	18854479	no	yes
CHR1	18924913	18925125	no	yes
CHR1	18982343	18982708	no	yes
CHR1	19022197	19022705	no	yes
CHR1	19197923	19198242	no	yes
CHR1	19217064	19217174	no	yes
CHR1	19233720	19234050	no	yes
CHR1	19361242	19361904	no	yes
CHR1	19398420	19398821	no	yes
CHR1	19426527	19426842	no	yes
CHR1	19608918	19609043	no	yes
CHR1	19636443	19636608	no	yes
CHR1	19719849	19720809	no	yes
CHR1	19808156	19808834	no	yes
CHR1	19919435	19919717	no	yes
CHR1	20106655	20106825	no	yes
CHR1	20112741	20113186	no	yes
CHR1	20126427	20126941	no	yes
CHR1	20191447	20191547	no	yes
CHR1	20313143	20313849	no	yes
CHR1	20325262	20325808	no	yes
CHR1	20329323	20330081	no	yes
CHR1	20330540	20330660	no	yes
CHR1	20394774	20394958	no	yes
CHR1	20432143	20432277	no	yes
CHR1	20540706	20541074	no	yes
CHR1	20777020	20778157	no	yes
CHR1	20980635	20981219	no	yes
CHR1	21034495	21034685	no	yes
CHR1	21047421	21047594	no	yes
CHR1	21053444	21054003	no	yes
CHR1	21216321	21218175	no	yes
CHR1	21223955	21224134	no	yes
CHR1	21225914	21226027	no	yes
CHR1	21230520	21231068	no	yes
CHR1	21342047	21342567	no	yes
CHR1	21473865	21474057	no	yes
CHR1	21581835	21582706	no	yes
CHR1	21606785	21607477	no	yes
CHR1	21637415	21638205	no	yes
CHR1	21682662	21682836	no	yes
CHR1	21753410	21753741	no	yes
CHR1	21756055	21756733	no	yes
CHR1	21778442	21778731	no	yes
CHR1	21779486	21779992	no	yes
CHR1	21808851	21809427	no	yes
CHR1	21813204	21813387	no	yes
CHR1	21824243	21824777	no	yes
CHR1	21833839	21833969	no	yes
CHR1	21836060	21836213	no	yes
CHR1	21845109	21845685	no	yes
CHR1	21857452	21859049	no	yes
CHR1	22105020	22105275	no	yes
CHR1	22108431	22108546	no	yes
CHR1	22117257	22117618	no	yes
CHR1	22451879	22452031	no	yes
CHR1	22562626	22562908	no	yes
CHR1	22930107	22930208	no	yes
CHR1	23121939	23122043	no	yes
CHR1	23140654	23141200	no	yes
CHR1	23152588	23153263	no	yes
CHR1	23280491	23280637	no	yes
CHR1	23640665	23640781	no	yes
CHR1	24274920	24275481	no	yes
CHR1	24291350	24291894	no	yes
CHR1	24369390	24369526	no	yes
CHR1	24409717	24410063	no	yes
CHR1	24477244	24477464	no	yes
CHR1	24533609	24534415	no	yes
CHR1	24704904	24705066	no	yes
CHR1	24985807	24986003	no	yes
CHR1	25057233	25057525	no	yes
CHR1	25162493	25162608	no	yes
CHR1	25266473	25266771	no	yes
CHR1	25349026	25349148	no	yes
CHR1	25357635	25358407	no	yes
CHR1	25489812	25489934	no	yes
CHR1	25572656	25572845	no	yes
CHR1	26110955	26111247	no	yes
CHR1	26179748	26179926	no	yes
CHR1	26268036	26268137	no	yes
CHR1	26525722	26526480	no	yes
CHR1	26561249	26561416	no	yes
CHR1	26677857	26678054	no	yes
CHR1	26753805	26753990	no	yes
CHR1	26760802	26761223	no	yes
CHR1	26913901	26914017	no	yes
CHR1	27068597	27068713	no	yes
CHR1	27636730	27637250	no	yes
CHR1	27971990	27972104	no	yes
CHR1	28945093	28945335	no	yes
CHR1	29481393	29481579	no	yes
CHR1	29841015	29841359	no	yes
CHR2	1020	10525	no	yes
CHR2	72078	72522	no	yes
CHR2	114432	114561	no	yes
CHR2	135103	135217	no	yes
CHR2	152200	152325	no	yes
CHR2	183973	184148	no	yes
CHR2	205213	205576	no	yes
CHR2	368349	368513	no	yes
CHR2	378427	378720	no	yes
CHR2	448670	448805	no	yes
CHR2	601400	603428	no	yes
CHR2	754310	754460	no	yes
CHR2	818954	819111	no	yes
CHR2	1012025	1012337	no	yes
CHR2	1110580	1111867	no	yes
CHR2	1134041	1134481	no	yes
CHR2	1227301	1227837	no	yes
CHR2	1246062	1246900	no	yes
CHR2	1258287	1259059	no	yes
CHR2	1297357	1297527	no	yes
CHR2	1303772	1304182	no	yes
CHR2	1308513	1308938	no	yes
CHR2	1310588	1311943	no	yes
CHR2	1312248	1312400	no	yes
CHR2	1360892	1361232	no	yes
CHR2	1402907	1403043	no	yes
CHR2	1421344	1421472	no	yes
CHR2	1431144	1432015	no	yes
CHR2	1446462	1446646	no	yes
CHR2	1548319	1548756	no	yes
CHR2	1653319	1654690	no	yes
CHR2	1676212	1676451	no	yes
CHR2	1701498	1701916	no	yes
CHR2	1758547	1758783	no	yes
CHR2	1774734	1775441	no	yes
CHR2	1822498	1823228	no	yes
CHR2	1835984	1836958	no	yes
CHR2	1848298	1849184	no	yes
CHR2	1855292	1855481	no	yes
CHR2	1880333	1880768	no	yes
CHR2	1886795	1887580	no	yes
CHR2	1888856	1888995	no	yes
CHR2	1945331	1945751	no	yes
CHR2	1981194	1981834	no	yes
CHR2	1987672	1988969	no	yes
CHR2	1995875	1995995	no	yes
CHR2	2002324	2002582	no	yes
CHR2	2004041	2004226	no	yes
CHR2	2005713	2005849	no	yes
CHR2	2031493	2031879	no	yes
CHR2	2034795	2035064	no	yes
CHR2	2039380	2039562	no	yes
CHR2	2085634	2087047	no	yes
CHR2	2107399	2107801	no	yes
CHR2	2117351	2117680	no	yes
CHR2	2139556	2140948	no	yes
CHR2	2148624	2148777	no	yes
CHR2	2169810	2170174	no	yes
CHR2	2254928	2255530	no	yes
CHR2	2294134	2295104	no	yes
CHR2	2318681	2319079	no	yes
CHR2	2330882	2332179	no	yes
CHR2	2355795	2358563	no	yes
CHR2	2366923	2367233	no	yes
CHR2	2413679	2415063	no	yes
CHR2	2445585	2446183	no	yes
CHR2	2512242	2512715	no	yes
CHR2	2549824	2549943	no	yes
CHR2	2554920	2555494	no	yes
CHR2	2574547	2574969	no	yes
CHR2	2597797	2598351	no	yes
CHR2	2605049	2606000	no	yes
CHR2	2624953	2625064	no	yes
CHR2	2649022	2649133	no	yes
CHR2	2663828	2664567	no	yes
CHR2	2723859	2724714	no	yes
CHR2	2752091	2753478	no	yes
CHR2	2769313	2769599	no	yes
CHR2	2788419	2789010	no	yes
CHR2	2844989	2845219	no	yes
CHR2	2945632	2945946	no	yes
CHR2	2953266	2953825	no	yes
CHR2	2986740	2987215	no	yes
CHR2	2989764	2990279	no	yes
CHR2	2993058	2994960	no	yes
CHR2	2998470	2998867	no	yes
CHR2	3000410	3000825	no	yes
CHR2	3002366	3002515	no	yes
CHR2	3009448	3009635	no	yes
CHR2	3023260	3024500	no	yes
CHR2	3025938	3026081	no	yes
CHR2	3031777	3031885	no	yes
CHR2	3040199	3040903	no	yes
CHR2	3058443	3058897	no	yes
CHR2	3109601	3109925	no	yes
CHR2	3133483	3135156	no	yes
CHR2	3191190	3192054	no	yes
CHR2	3205837	3205953	no	yes
CHR2	3210931	3211500	no	yes
CHR2	3213512	3213667	no	yes
CHR2	3256280	3256735	no	yes
CHR2	3266965	3267118	no	yes
CHR2	3275096	3275319	no	yes
CHR2	3282066	3282495	no	yes
CHR2	3289597	3289828	no	yes
CHR2	3311802	3312566	no	yes
CHR2	3316414	3316890	no	yes
CHR2	3325376	3325639	no	yes
CHR2	3330473	3331059	no	yes
CHR2	3332928	3333831	no	yes
CHR2	3334366	3334521	no	yes
CHR2	3339738	3340105	no	yes
CHR2	3340970	3341569	no	yes
CHR2	3341880	3343073	no	yes
CHR2	3344644	3344977	no	yes
CHR2	3353941	3354103	no	yes
CHR2	3355362	3356017	no	yes
CHR2	3377593	3378131	no	yes
CHR2	3379791	3380274	no	yes
CHR2	3398571	3399946	no	yes
CHR2	3401213	3402382	no	yes
CHR2	3405449	3406086	no	yes
CHR2	3408490	3408974	no	yes
CHR2	3410201	3410590	no	yes
CHR2	3411021	3411171	no	yes
CHR2	3411734	3412088	no	yes
CHR2	3413388	3413540	no	yes
CHR2	3421179	3421863	no	yes
CHR2	3428023	3428470	no	yes
CHR2	3435750	3436043	no	yes
CHR2	3444606	3444873	no	yes
CHR2	3446154	3446502	no	yes
CHR2	3448049	3448347	no	yes
CHR2	3450412	3450674	no	yes
CHR2	3453510	3454642	no	yes
CHR2	3460551	3461041	no	yes
CHR2	3475764	3475935	no	yes
CHR2	3487537	3487663	no	yes
CHR2	3492957	3493412	no	yes
CHR2	3495409	3495941	no	yes
CHR2	3525373	3525535	no	yes
CHR2	3575163	3575634	no	yes
CHR2	3578786	3578945	no	yes
CHR2	3589009	3589388	no	yes
CHR2	3589808	3590089	no	yes
CHR2	3590620	3590839	no	yes
CHR2	3602189	3602371	no	yes
CHR2	3673740	3673872	no	yes
CHR2	3707101	3707219	no	yes
CHR2	3746749	3747027	no	yes
CHR2	3747446	3748963	no	yes
CHR2	3753443	3753596	no	yes
CHR2	3775151	3776017	no	yes
CHR2	3784371	3784783	no	yes
CHR2	3852702	3852847	no	yes
CHR2	3902467	3902685	no	yes
CHR2	4017327	4017633	no	yes
CHR2	4018097	4018263	no	yes
CHR2	4021638	4022372	no	yes
CHR2	4028751	4029186	no	yes
CHR2	4030160	4031035	no	yes
CHR2	4059222	4059353	no	yes
CHR2	4072334	4072528	no	yes
CHR2	4107228	4107513	no	yes
CHR2	4120998	4121116	no	yes
CHR2	4134297	4134721	no	yes
CHR2	4140417	4141242	no	yes
CHR2	4214426	4215338	no	yes
CHR2	4272902	4274417	no	yes
CHR2	4296069	4296655	no	yes
CHR2	4306340	4307401	no	yes
CHR2	4328242	4330285	no	yes
CHR2	4335579	4336457	no	yes
CHR2	4361558	4362260	no	yes
CHR2	4375186	4375532	no	yes
CHR2	4428148	4428286	no	yes
CHR2	4434276	4434495	no	yes
CHR2	4436751	4437114	no	yes
CHR2	4441695	4442579	no	yes
CHR2	4455514	4455642	no	yes
CHR2	4466269	4466633	no	yes
CHR2	4468126	4468284	no	yes
CHR2	4470795	4470998	no	yes
CHR2	4536153	4538842	no	yes
CHR2	4541375	4541672	no	yes
CHR2	4542521	4543689	no	yes
CHR2	4583140	4583734	no	yes
CHR2	4622121	4624253	no	yes
CHR2	4656465	4656788	no	yes
CHR2	4668727	4669491	no	yes
CHR2	4737220	4737371	no	yes
CHR2	4748540	4750174	no	yes
CHR2	4756332	4756824	no	yes
CHR2	4760414	4760820	no	yes
CHR2	4786370	4786892	no	yes
CHR2	4797313	4797566	no	yes
CHR2	4831201	4831413	no	yes
CHR2	4860917	4861500	no	yes
CHR2	4866526	4866707	no	yes
CHR2	4883899	4884093	no	yes
CHR2	4909804	4910367	no	yes
CHR2	4930505	4930625	no	yes
CHR2	4937330	4937461	no	yes
CHR2	5052502	5052605	no	yes
CHR2	5056353	5056525	no	yes
CHR2	5098090	5098439	no	yes
CHR2	5154009	5154545	no	yes
CHR2	5171426	5172063	no	yes
CHR2	5177915	5179735	no	yes
CHR2	5217816	5218194	no	yes
CHR2	5315562	5315710	no	yes
CHR2	5325789	5325905	no	yes
CHR2	5326593	5326695	no	yes
CHR2	5342643	5342860	no	yes
CHR2	5343351	5343477	no	yes
CHR2	5345017	5345467	no	yes
CHR2	5412096	5412375	no	yes
CHR2	5414689	5415332	no	yes
CHR2	5446661	5446774	no	yes
CHR2	5453077	5453254	no	yes
CHR2	5500513	5500870	no	yes
CHR2	5510019	5510878	no	yes
CHR2	5615204	5615718	no	yes
CHR2	5650687	5651343	no	yes
CHR2	5724354	5724557	no	yes
CHR2	5724878	5725401	no	yes
CHR2	5737838	5739444	no	yes
CHR2	5800018	5800384	no	yes
CHR2	5816684	5816865	no	yes
CHR2	5830118	5830293	no	yes
CHR2	5831508	5831632	no	yes
CHR2	5835130	5835698	no	yes
CHR2	5846048	5846178	no	yes
CHR2	5868324	5869785	no	yes
CHR2	5886099	5886623	no	yes
CHR2	5966702	5967072	no	yes
CHR2	5971674	5972248	no	yes
CHR2	5975780	5976160	no	yes
CHR2	5998242	5998441	no	yes
CHR2	6009527	6009648	no	yes
CHR2	6016522	6016866	no	yes
CHR2	6055972	6056075	no	yes
CHR2	6068493	6069098	no	yes
CHR2	6130522	6130766	no	yes
CHR2	6145599	6145819	no	yes
CHR2	6191480	6192590	no	yes
CHR2	6196234	6198076	no	yes
CHR2	6215197	6215896	no	yes
CHR2	6230272	6230443	no	yes
CHR2	6251281	6251416	no	yes
CHR2	6255544	6255711	no	yes
CHR2	6262515	6263291	no	yes
CHR2	6317017	6317741	no	yes
CHR2	6353226	6354003	no	yes
CHR2	6377967	6379011	no	yes
CHR2	6403672	6403912	no	yes
CHR2	6415501	6417282	no	yes
CHR2	6426757	6427301	no	yes
CHR2	6443201	6443545	no	yes
CHR2	6457346	6457696	no	yes
CHR2	6466497	6466626	no	yes
CHR2	6478347	6478766	no	yes
CHR2	6486340	6487792	no	yes
CHR2	6516358	6516697	no	yes
[truncated: 9,897 more rows]
