# Supplementary material for: Natural depletion of histone H1 in sex cells causes DNA demethylation, heterochromatin decondensation and transposon activation
Source: eLife. 2019 May 28;8:e42530. doi: 10.7554/eLife.42530 (PMC6594752; doi:10.7554/eLife.42530)
Supplement: Figure 2—source data 1. [file elife-42530-fig2-data1.xlsx]

## Sheet: Sheet1
CHR	Start	End	Overlap VC DME target	Significantly CG hypermethylated in sperm than VC
CHR1	641	950	yes	yes
CHR1	1160298	1160450	yes	yes
CHR1	1592201	1592501	yes	yes
CHR1	1613831	1614033	yes	yes
CHR1	2793845	2794523	yes	yes
CHR1	3006683	3006885	yes	yes
CHR1	3770976	3771098	yes	yes
CHR1	4052096	4052373	yes	yes
CHR1	4061758	4061926	yes	yes
CHR1	4068692	4068975	yes	yes
CHR1	4685188	4685428	yes	yes
CHR1	5101772	5101966	yes	yes
CHR1	5972002	5972271	yes	yes
CHR1	6770583	6770683	yes	yes
CHR1	7745865	7746338	yes	yes
CHR1	7766116	7766511	yes	yes
CHR1	8200988	8201272	yes	yes
CHR1	8738102	8738331	yes	yes
CHR1	8764754	8764907	yes	yes
CHR1	8772669	8773050	yes	yes
CHR1	8787236	8787429	yes	yes
CHR1	8809855	8809958	yes	yes
CHR1	8824143	8824336	yes	yes
CHR1	9112256	9112477	yes	yes
CHR1	9135502	9135674	yes	yes
CHR1	9684603	9684734	yes	yes
CHR1	9852751	9852927	yes	yes
CHR1	10444062	10444187	yes	yes
CHR1	10602680	10603131	yes	yes
CHR1	10776448	10776685	yes	yes
CHR1	10883321	10883617	yes	yes
CHR1	10982963	10983140	yes	yes
CHR1	11306710	11306814	yes	yes
CHR1	11619278	11619392	yes	yes
CHR1	11686925	11687029	yes	yes
CHR1	11704904	11705324	yes	yes
CHR1	11732963	11733128	yes	yes
CHR1	11752657	11752823	yes	yes
CHR1	11807724	11807869	yes	yes
CHR1	11894928	11895129	yes	yes
CHR1	11897154	11897745	yes	yes
CHR1	12034945	12035126	yes	yes
CHR1	12035690	12035813	yes	yes
CHR1	12071001	12071104	yes	yes
CHR1	12133040	12133374	yes	yes
CHR1	12139955	12140187	yes	yes
CHR1	12278432	12278988	yes	yes
CHR1	12380966	12381174	yes	yes
CHR1	12444215	12444479	yes	yes
CHR1	12445920	12446029	yes	yes
CHR1	12467588	12467842	yes	yes
CHR1	12509587	12509722	yes	yes
CHR1	12512181	12512600	yes	yes
CHR1	12558068	12558335	yes	yes
CHR1	12579612	12579747	yes	yes
CHR1	12679648	12679792	yes	yes
CHR1	12699131	12699304	yes	yes
CHR1	12719991	12720188	yes	yes
CHR1	12731875	12732640	yes	yes
CHR1	12814135	12814246	yes	yes
CHR1	12814833	12815509	yes	yes
CHR1	12822802	12822914	yes	yes
CHR1	12824826	12824977	yes	yes
CHR1	12829845	12830192	yes	yes
CHR1	12836914	12837035	yes	yes
CHR1	12861919	12862058	yes	yes
CHR1	12929523	12929710	yes	yes
CHR1	12930507	12931308	yes	yes
CHR1	12946442	12946708	yes	yes
CHR1	12999521	12999828	yes	yes
CHR1	13008325	13008442	yes	yes
CHR1	13015617	13015717	yes	yes
CHR1	13084505	13084982	yes	yes
CHR1	13109473	13109659	yes	yes
CHR1	13110274	13110740	yes	yes
CHR1	13180105	13180477	yes	yes
CHR1	13188391	13188838	yes	yes
CHR1	13232668	13233029	yes	yes
CHR1	13234056	13234963	yes	yes
CHR1	13235661	13235991	yes	yes
CHR1	13268406	13268544	yes	yes
CHR1	13269121	13269339	yes	yes
CHR1	13272246	13272417	yes	yes
CHR1	13301674	13302231	yes	yes
CHR1	13303259	13303397	yes	yes
CHR1	13304080	13304320	yes	yes
CHR1	13306644	13306747	yes	yes
CHR1	13307251	13307615	yes	yes
CHR1	13311224	13311333	yes	yes
CHR1	13311682	13311865	yes	yes
CHR1	13394322	13394602	yes	yes
CHR1	13402388	13402764	yes	yes
CHR1	13417783	13418076	yes	yes
CHR1	13419706	13419902	yes	yes
CHR1	13500556	13500691	yes	yes
CHR1	13506940	13507308	yes	yes
CHR1	13524406	13525358	yes	yes
CHR1	13600344	13600676	yes	yes
CHR1	13607929	13608578	yes	yes
CHR1	13613565	13613849	yes	yes
CHR1	13629480	13629641	yes	yes
CHR1	13631511	13631754	yes	yes
CHR1	13644009	13644600	yes	yes
CHR1	13656822	13657168	yes	yes
CHR1	13657661	13657909	yes	yes
CHR1	13758042	13758341	yes	yes
CHR1	13759258	13759751	yes	yes
CHR1	13762519	13762922	yes	yes
CHR1	13814900	13815172	yes	yes
CHR1	13823937	13824085	yes	yes
CHR1	13848906	13849456	yes	yes
CHR1	13875650	13875961	yes	yes
CHR1	13876596	13876872	yes	yes
CHR1	13880940	13881213	yes	yes
CHR1	13904724	13904825	yes	yes
CHR1	13907814	13908226	yes	yes
CHR1	13929664	13929949	yes	yes
CHR1	13935722	13936007	yes	yes
CHR1	13966390	13966622	yes	yes
CHR1	13976492	13976795	yes	yes
CHR1	13992468	13992971	yes	yes
CHR1	14016140	14016371	yes	yes
CHR1	14033350	14033632	yes	yes
CHR1	14045886	14046440	yes	yes
CHR1	14057364	14057542	yes	yes
CHR1	14058526	14059072	yes	yes
CHR1	14061029	14061206	yes	yes
CHR1	14065498	14065745	yes	yes
CHR1	14066069	14066605	yes	yes
CHR1	14070211	14070324	yes	yes
CHR1	14073497	14073643	yes	yes
CHR1	14079665	14079928	yes	yes
CHR1	14108514	14108861	yes	yes
CHR1	14136823	14137273	yes	yes
CHR1	14191327	14191517	yes	yes
CHR1	14195244	14196491	yes	yes
CHR1	14311155	14311488	yes	yes
CHR1	14333614	14333746	yes	yes
CHR1	14605385	14605581	yes	yes
CHR1	14605927	14606086	yes	yes
CHR1	14607615	14607717	yes	yes
CHR1	14657019	14657138	yes	yes
CHR1	14677947	14678649	yes	yes
CHR1	15056333	15056533	yes	yes
CHR1	15057003	15057199	yes	yes
CHR1	15058475	15058633	yes	yes
CHR1	15455253	15455719	yes	yes
CHR1	15612071	15612966	yes	yes
CHR1	15613543	15614650	yes	yes
CHR1	15615341	15615615	yes	yes
CHR1	15661446	15661637	yes	yes
CHR1	15691262	15691462	yes	yes
CHR1	15715841	15716084	yes	yes
CHR1	15747027	15747175	yes	yes
CHR1	15751046	15751454	yes	yes
CHR1	15772325	15772475	yes	yes
CHR1	15781402	15782103	yes	yes
CHR1	15796286	15797048	yes	yes
CHR1	15797389	15797518	yes	yes
CHR1	15797950	15798956	yes	yes
CHR1	15799330	15799521	yes	yes
CHR1	15862200	15862477	yes	yes
CHR1	15874864	15875664	yes	yes
CHR1	15876082	15876454	yes	yes
CHR1	15888259	15888362	yes	yes
CHR1	15912246	15913388	yes	yes
CHR1	15941948	15942301	yes	yes
CHR1	15955515	15955651	yes	yes
CHR1	15959630	15959827	yes	yes
CHR1	15969600	15969818	yes	yes
CHR1	15988842	15989612	yes	yes
CHR1	15990406	15990705	yes	yes
CHR1	15996148	15997288	yes	yes
CHR1	16000678	16000988	yes	yes
CHR1	16024137	16024288	yes	yes
CHR1	16026135	16026244	yes	yes
CHR1	16026956	16027134	yes	yes
CHR1	16027520	16027630	yes	yes
CHR1	16035673	16035975	yes	yes
CHR1	16043598	16043888	yes	yes
CHR1	16049414	16049676	yes	yes
CHR1	16054327	16054971	yes	yes
CHR1	16057849	16058233	yes	yes
CHR1	16063439	16063609	yes	yes
CHR1	16070812	16071031	yes	yes
CHR1	16076935	16077776	yes	yes
CHR1	16082854	16083054	yes	yes
CHR1	16083756	16084126	yes	yes
CHR1	16116959	16117427	yes	yes
CHR1	16169180	16169599	yes	yes
CHR1	16178205	16178419	yes	yes
CHR1	16182420	16182537	yes	yes
CHR1	16194188	16194291	yes	yes
CHR1	16249638	16249952	yes	yes
CHR1	16250592	16250781	yes	yes
CHR1	16295468	16295594	yes	yes
CHR1	16318225	16318333	yes	yes
CHR1	16321596	16321986	yes	yes
CHR1	16332864	16332965	yes	yes
CHR1	16346160	16346374	yes	yes
CHR1	16348163	16348502	yes	yes
CHR1	16349182	16349419	yes	yes
CHR1	16350290	16350401	yes	yes
CHR1	16353285	16353726	yes	yes
CHR1	16355276	16355515	yes	yes
CHR1	16356106	16356613	yes	yes
CHR1	16368307	16368555	yes	yes
CHR1	16410678	16410857	yes	yes
CHR1	16421017	16421433	yes	yes
CHR1	16456324	16456629	yes	yes
CHR1	16457163	16457353	yes	yes
CHR1	16494864	16495054	yes	yes
CHR1	16569288	16569433	yes	yes
CHR1	16592517	16592700	yes	yes
CHR1	16607053	16607156	yes	yes
CHR1	16608286	16608388	yes	yes
CHR1	16662376	16662790	yes	yes
CHR1	16706466	16706727	yes	yes
CHR1	16741935	16742228	yes	yes
CHR1	16747570	16747890	yes	yes
CHR1	16748464	16748581	yes	yes
CHR1	16867867	16867980	yes	yes
CHR1	16877033	16877457	yes	yes
CHR1	16884649	16885593	yes	yes
CHR1	16885975	16886127	yes	yes
CHR1	16946821	16947504	yes	yes
CHR1	16947981	16948192	yes	yes
CHR1	16960574	16961685	yes	yes
CHR1	17018985	17019341	yes	yes
CHR1	17020176	17020682	yes	yes
CHR1	17104632	17105174	yes	yes
CHR1	17111538	17112020	yes	yes
CHR1	17187625	17187823	yes	yes
CHR1	17489215	17489588	yes	yes
CHR1	17490174	17490299	yes	yes
CHR1	17575190	17575714	yes	yes
CHR1	17681238	17681480	yes	yes
CHR1	17681869	17682016	yes	yes
CHR1	17714975	17715184	yes	yes
CHR1	17856327	17856496	yes	yes
CHR1	17924596	17924731	yes	yes
CHR1	18034022	18034128	yes	yes
CHR1	18324734	18324998	yes	yes
CHR1	18373268	18373516	yes	yes
CHR1	18553150	18553767	yes	yes
CHR1	18613038	18613139	yes	yes
CHR1	18657762	18657882	yes	yes
CHR1	18743145	18743438	yes	yes
CHR1	18851536	18851665	yes	yes
CHR1	18955848	18955962	yes	yes
CHR1	19022788	19023649	yes	yes
CHR1	19073591	19073692	yes	yes
CHR1	19713486	19713653	yes	yes
CHR1	19798028	19798132	yes	yes
CHR1	20331011	20331111	yes	yes
CHR1	20462670	20462951	yes	yes
CHR1	21302580	21302994	yes	yes
CHR1	21305408	21306061	yes	yes
CHR1	21341564	21341703	yes	yes
CHR1	21592684	21592904	yes	yes
CHR1	21731112	21731234	yes	yes
CHR1	21757721	21757823	yes	yes
CHR1	21772870	21773032	yes	yes
CHR1	21777612	21778133	yes	yes
CHR1	21788871	21790108	yes	yes
CHR1	21799802	21800161	yes	yes
CHR1	21813870	21814593	yes	yes
CHR1	21825516	21825961	yes	yes
CHR1	22107283	22107497	yes	yes
CHR1	22323186	22323290	yes	yes
CHR1	22777410	22777620	yes	yes
CHR1	22855645	22855767	yes	yes
CHR1	23360213	23360357	yes	yes
CHR1	23884342	23884453	yes	yes
CHR1	23907200	23907324	yes	yes
CHR1	23929279	23929457	yes	yes
CHR1	23932327	23932523	yes	yes
CHR1	24223221	24223348	yes	yes
CHR1	24272776	24273206	yes	yes
CHR1	24360771	24360904	yes	yes
CHR1	24425608	24425868	yes	yes
CHR1	25163090	25163394	yes	yes
CHR1	25343386	25343566	yes	yes
CHR1	26385066	26385167	yes	yes
CHR1	26635342	26635520	yes	yes
CHR1	26650726	26650859	yes	yes
CHR1	27635426	27635526	yes	yes
CHR1	27635962	27636129	yes	yes
CHR1	28706943	28707197	yes	yes
CHR1	29589529	29589690	yes	yes
CHR2	70833	71001	yes	yes
CHR2	238007	238162	yes	yes
CHR2	566219	566551	yes	yes
CHR2	569527	569852	yes	yes
CHR2	574476	574677	yes	yes
CHR2	578130	579149	yes	yes
CHR2	895598	895707	yes	yes
CHR2	1017578	1017710	yes	yes
CHR2	1070680	1071004	yes	yes
CHR2	1198647	1199025	yes	yes
CHR2	1200687	1201186	yes	yes
CHR2	1228546	1229101	yes	yes
CHR2	1229464	1229669	yes	yes
CHR2	1302119	1302286	yes	yes
CHR2	1305458	1305779	yes	yes
CHR2	1306091	1307146	yes	yes
CHR2	1342814	1343336	yes	yes
CHR2	1424465	1424907	yes	yes
CHR2	1485479	1485601	yes	yes
CHR2	1579851	1579961	yes	yes
CHR2	1671079	1671215	yes	yes
CHR2	1745063	1745786	yes	yes
CHR2	1750340	1750683	yes	yes
CHR2	1768049	1768164	yes	yes
CHR2	1769769	1769896	yes	yes
CHR2	1771811	1772239	yes	yes
CHR2	1773394	1773641	yes	yes
CHR2	1777920	1778439	yes	yes
CHR2	1786751	1786871	yes	yes
CHR2	1795245	1795638	yes	yes
CHR2	1796725	1797108	yes	yes
CHR2	1811612	1811718	yes	yes
CHR2	1812046	1812941	yes	yes
CHR2	1849893	1850024	yes	yes
CHR2	1953464	1953686	yes	yes
CHR2	1954230	1954505	yes	yes
CHR2	1954837	1955072	yes	yes
CHR2	1964146	1964249	yes	yes
CHR2	1980294	1980470	yes	yes
CHR2	1998350	1998506	yes	yes
CHR2	1999330	1999569	yes	yes
CHR2	2050073	2050346	yes	yes
CHR2	2061058	2061305	yes	yes
CHR2	2061985	2062312	yes	yes
CHR2	2105290	2105481	yes	yes
CHR2	2106496	2106921	yes	yes
CHR2	2109082	2109238	yes	yes
CHR2	2116831	2116946	yes	yes
CHR2	2128196	2128442	yes	yes
CHR2	2134036	2134381	yes	yes
CHR2	2163115	2163357	yes	yes
CHR2	2178356	2178504	yes	yes
CHR2	2186735	2187016	yes	yes
CHR2	2189150	2189691	yes	yes
CHR2	2210229	2210401	yes	yes
CHR2	2221210	2221313	yes	yes
CHR2	2249721	2250142	yes	yes
CHR2	2285466	2285626	yes	yes
CHR2	2365401	2365642	yes	yes
CHR2	2369518	2369862	yes	yes
CHR2	2385219	2386252	yes	yes
CHR2	2466515	2466833	yes	yes
CHR2	2534506	2535278	yes	yes
CHR2	2538503	2538763	yes	yes
CHR2	2539512	2540162	yes	yes
CHR2	2540812	2540915	yes	yes
CHR2	2583189	2583310	yes	yes
CHR2	2603712	2603979	yes	yes
CHR2	2637090	2637310	yes	yes
CHR2	2645018	2645252	yes	yes
CHR2	2646557	2647060	yes	yes
CHR2	2665292	2665710	yes	yes
CHR2	2666462	2666609	yes	yes
CHR2	2667032	2667365	yes	yes
CHR2	2673617	2674421	yes	yes
CHR2	2687263	2687418	yes	yes
CHR2	2714802	2715673	yes	yes
CHR2	2720122	2720340	yes	yes
CHR2	2732634	2732764	yes	yes
CHR2	2746337	2746984	yes	yes
CHR2	2749257	2749407	yes	yes
CHR2	2768133	2768586	yes	yes
CHR2	2770250	2770732	yes	yes
CHR2	2785684	2786261	yes	yes
CHR2	2809010	2809568	yes	yes
CHR2	2810523	2811007	yes	yes
CHR2	2820580	2820736	yes	yes
CHR2	2822722	2822855	yes	yes
CHR2	2825747	2826018	yes	yes
CHR2	2836909	2837435	yes	yes
CHR2	2838497	2838729	yes	yes
CHR2	2882747	2883644	yes	yes
CHR2	2938182	2938295	yes	yes
CHR2	2948200	2948304	yes	yes
CHR2	2951651	2951769	yes	yes
CHR2	2952440	2952541	yes	yes
CHR2	2973256	2973431	yes	yes
CHR2	2991433	2991960	yes	yes
CHR2	2995371	2995677	yes	yes
CHR2	3004168	3004273	yes	yes
CHR2	3008221	3008803	yes	yes
CHR2	3010648	3011333	yes	yes
CHR2	3016262	3016415	yes	yes
CHR2	3019204	3019368	yes	yes
CHR2	3029310	3030651	yes	yes
CHR2	3032784	3033052	yes	yes
CHR2	3035779	3035894	yes	yes
CHR2	3041283	3041713	yes	yes
CHR2	3060776	3060894	yes	yes
CHR2	3083889	3084249	yes	yes
CHR2	3088990	3089310	yes	yes
CHR2	3092457	3092691	yes	yes
CHR2	3094287	3094816	yes	yes
CHR2	3114005	3114337	yes	yes
CHR2	3115334	3115470	yes	yes
CHR2	3121268	3122087	yes	yes
CHR2	3131006	3132241	yes	yes
CHR2	3137900	3138048	yes	yes
CHR2	3139044	3139731	yes	yes
CHR2	3143283	3143522	yes	yes
CHR2	3145514	3145997	yes	yes
CHR2	3147539	3148046	yes	yes
CHR2	3148398	3148502	yes	yes
CHR2	3150266	3150395	yes	yes
CHR2	3155599	3156138	yes	yes
CHR2	3157017	3157598	yes	yes
CHR2	3159250	3160719	yes	yes
CHR2	3177497	3177597	yes	yes
CHR2	3181962	3182148	yes	yes
CHR2	3187107	3187285	yes	yes
CHR2	3187780	3188071	yes	yes
CHR2	3214135	3214519	yes	yes
CHR2	3219823	3220384	yes	yes
CHR2	3240817	3241129	yes	yes
CHR2	3244721	3244870	yes	yes
CHR2	3245848	3246014	yes	yes
CHR2	3246988	3247145	yes	yes
CHR2	3247466	3247937	yes	yes
CHR2	3248323	3248446	yes	yes
CHR2	3248952	3249304	yes	yes
CHR2	3250018	3251325	yes	yes
CHR2	3252049	3252381	yes	yes
CHR2	3255642	3255878	yes	yes
CHR2	3257116	3257858	yes	yes
CHR2	3260112	3260959	yes	yes
CHR2	3261532	3261776	yes	yes
CHR2	3263938	3264884	yes	yes
CHR2	3265456	3265827	yes	yes
CHR2	3268512	3269373	yes	yes
CHR2	3269899	3270577	yes	yes
CHR2	3272298	3272509	yes	yes
CHR2	3273407	3273518	yes	yes
CHR2	3275597	3276590	yes	yes
CHR2	3277791	3278278	yes	yes
CHR2	3278895	3279076	yes	yes
CHR2	3280440	3281012	yes	yes
CHR2	3282899	3282999	yes	yes
CHR2	3283490	3284272	yes	yes
CHR2	3284888	3285377	yes	yes
CHR2	3288050	3288283	yes	yes
CHR2	3291883	3292240	yes	yes
CHR2	3294162	3294519	yes	yes
CHR2	3295425	3295797	yes	yes
CHR2	3297613	3298080	yes	yes
CHR2	3299434	3299772	yes	yes
CHR2	3300432	3301161	yes	yes
CHR2	3302322	3302479	yes	yes
CHR2	3303058	3303262	yes	yes
CHR2	3303779	3303977	yes	yes
CHR2	3305395	3305764	yes	yes
CHR2	3306227	3306355	yes	yes
CHR2	3306703	3306840	yes	yes
CHR2	3308087	3308253	yes	yes
CHR2	3309039	3309545	yes	yes
CHR2	3312832	3313756	yes	yes
CHR2	3314594	3315060	yes	yes
CHR2	3315709	3315959	yes	yes
CHR2	3317285	3317933	yes	yes
CHR2	3318996	3319588	yes	yes
CHR2	3320088	3320231	yes	yes
CHR2	3320756	3321235	yes	yes
CHR2	3322076	3322229	yes	yes
CHR2	3323188	3323462	yes	yes
CHR2	3323826	3324265	yes	yes
CHR2	3324890	3325060	yes	yes
CHR2	3327191	3327523	yes	yes
CHR2	3328659	3328826	yes	yes
CHR2	3331627	3332163	yes	yes
CHR2	3335032	3335210	yes	yes
CHR2	3336304	3336477	yes	yes
CHR2	3337071	3337210	yes	yes
CHR2	3338529	3339293	yes	yes
CHR2	3343271	3343960	yes	yes
CHR2	3346180	3346301	yes	yes
CHR2	3347192	3348709	yes	yes
CHR2	3349018	3349252	yes	yes
CHR2	3349646	3350302	yes	yes
CHR2	3350928	3351733	yes	yes
CHR2	3353456	3353592	yes	yes
CHR2	3356424	3357154	yes	yes
CHR2	3359329	3360148	yes	yes
CHR2	3361972	3362228	yes	yes
CHR2	3362777	3363386	yes	yes
CHR2	3365639	3365778	yes	yes
CHR2	3366340	3366931	yes	yes
CHR2	3367385	3367952	yes	yes
CHR2	3368342	3368503	yes	yes
CHR2	3369604	3369843	yes	yes
CHR2	3370460	3370705	yes	yes
CHR2	3371160	3371435	yes	yes
CHR2	3373946	3375207	yes	yes
CHR2	3376551	3376714	yes	yes
CHR2	3378958	3379304	yes	yes
CHR2	3388111	3388763	yes	yes
CHR2	3390322	3390435	yes	yes
CHR2	3392513	3392783	yes	yes
CHR2	3393826	3393929	yes	yes
CHR2	3414379	3414497	yes	yes
CHR2	3415889	3416041	yes	yes
CHR2	3418665	3419190	yes	yes
CHR2	3419626	3420117	yes	yes
CHR2	3423687	3423837	yes	yes
CHR2	3425503	3425726	yes	yes
CHR2	3432077	3432296	yes	yes
CHR2	3458387	3458618	yes	yes
CHR2	3465127	3465639	yes	yes
CHR2	3469873	3470053	yes	yes
CHR2	3473131	3473417	yes	yes
CHR2	3478685	3478977	yes	yes
CHR2	3479968	3480083	yes	yes
CHR2	3482575	3482727	yes	yes
CHR2	3485534	3485717	yes	yes
CHR2	3486822	3487055	yes	yes
CHR2	3490008	3490142	yes	yes
CHR2	3490742	3491289	yes	yes
CHR2	3491713	3492004	yes	yes
CHR2	3494368	3494560	yes	yes
CHR2	3498512	3498706	yes	yes
CHR2	3499128	3500143	yes	yes
CHR2	3500798	3500910	yes	yes
CHR2	3502612	3502715	yes	yes
CHR2	3503163	3503432	yes	yes
CHR2	3503750	3504011	yes	yes
CHR2	3504723	3504873	yes	yes
CHR2	3505555	3505663	yes	yes
CHR2	3507247	3507433	yes	yes
CHR2	3508841	3509257	yes	yes
CHR2	3510717	3511598	yes	yes
CHR2	3561618	3561798	yes	yes
CHR2	3593174	3594975	yes	yes
CHR2	3597412	3597863	yes	yes
CHR2	3721491	3721608	yes	yes
CHR2	3726360	3726595	yes	yes
CHR2	3773510	3773983	yes	yes
CHR2	3774320	3774453	yes	yes
CHR2	3776781	3776980	yes	yes
CHR2	3777327	3777948	yes	yes
CHR2	3794998	3795118	yes	yes
CHR2	3801709	3801864	yes	yes
CHR2	3802285	3802459	yes	yes
CHR2	3825375	3825522	yes	yes
CHR2	3832790	3833039	yes	yes
CHR2	3853500	3854265	yes	yes
CHR2	3908272	3908479	yes	yes
CHR2	3926100	3926266	yes	yes
CHR2	3927657	3928104	yes	yes
CHR2	3937137	3937471	yes	yes
CHR2	3937775	3938837	yes	yes
CHR2	3941440	3941884	yes	yes
CHR2	3961147	3961369	yes	yes
CHR2	3962630	3962734	yes	yes
CHR2	3987853	3988063	yes	yes
CHR2	3992258	3992381	yes	yes
CHR2	3995049	3995561	yes	yes
CHR2	3998194	3998471	yes	yes
CHR2	4000850	4000963	yes	yes
CHR2	4031774	4032106	yes	yes
CHR2	4033959	4034855	yes	yes
CHR2	4038363	4039294	yes	yes
CHR2	4043881	4046035	yes	yes
CHR2	4087389	4087813	yes	yes
CHR2	4089235	4089573	yes	yes
CHR2	4108511	4108741	yes	yes
CHR2	4139898	4140008	yes	yes
CHR2	4170255	4170436	yes	yes
CHR2	4219945	4220089	yes	yes
CHR2	4270187	4270488	yes	yes
CHR2	4292993	4293593	yes	yes
CHR2	4297712	4298186	yes	yes
CHR2	4299720	4299897	yes	yes
CHR2	4372125	4372818	yes	yes
CHR2	4407430	4407842	yes	yes
CHR2	4424103	4425130	yes	yes
CHR2	4425613	4426201	yes	yes
CHR2	4430072	4430224	yes	yes
CHR2	4431457	4432066	yes	yes
CHR2	4440444	4440585	yes	yes
CHR2	4443372	4443668	yes	yes
CHR2	4444420	4444571	yes	yes
CHR2	4457145	4457496	yes	yes
CHR2	4508773	4508950	yes	yes
CHR2	4602569	4603242	yes	yes
CHR2	4608278	4608819	yes	yes
CHR2	4617902	4618146	yes	yes
CHR2	4626356	4626953	yes	yes
CHR2	4632684	4633092	yes	yes
CHR2	4633596	4634532	yes	yes
CHR2	4635240	4635772	yes	yes
CHR2	4641989	4642260	yes	yes
CHR2	4642889	4643108	yes	yes
CHR2	4643505	4643778	yes	yes
CHR2	4646872	4647649	yes	yes
CHR2	4654361	4654760	yes	yes
CHR2	4664576	4664882	yes	yes
CHR2	4667260	4667722	yes	yes
CHR2	4725306	4725612	yes	yes
CHR2	4730284	4730421	yes	yes
CHR2	4733968	4734127	yes	yes
CHR2	4752830	4753013	yes	yes
CHR2	4774041	4774294	yes	yes
CHR2	4775308	4775449	yes	yes
CHR2	4784838	4785229	yes	yes
CHR2	4821561	4822137	yes	yes
CHR2	4822454	4822867	yes	yes
CHR2	4823865	4824256	yes	yes
CHR2	4856986	4857205	yes	yes
CHR2	4859078	4859789	yes	yes
CHR2	4862593	4862694	yes	yes
CHR2	4881519	4881693	yes	yes
CHR2	4899913	4900328	yes	yes
CHR2	4909057	4909222	yes	yes
CHR2	4915693	4916079	yes	yes
CHR2	4927141	4927267	yes	yes
CHR2	4945854	4945985	yes	yes
CHR2	4946724	4947405	yes	yes
CHR2	4948035	4948259	yes	yes
CHR2	4967627	4967831	yes	yes
CHR2	4970493	4970744	yes	yes
CHR2	5084538	5084838	yes	yes
CHR2	5121448	5121637	yes	yes
CHR2	5143466	5144185	yes	yes
CHR2	5147006	5147481	yes	yes
CHR2	5158388	5158782	yes	yes
CHR2	5161997	5162223	yes	yes
CHR2	5227698	5227893	yes	yes
CHR2	5248375	5248569	yes	yes
CHR2	5248965	5249081	yes	yes
CHR2	5294664	5296609	yes	yes
CHR2	5318423	5318588	yes	yes
CHR2	5384528	5384821	yes	yes
CHR2	5385269	5385578	yes	yes
CHR2	5388022	5388500	yes	yes
CHR2	5413242	5413360	yes	yes
CHR2	5429272	5429589	yes	yes
CHR2	5430041	5430148	yes	yes
CHR2	5431108	5431216	yes	yes
CHR2	5437659	5438739	yes	yes
CHR2	5449208	5449329	yes	yes
CHR2	5459199	5460385	yes	yes
CHR2	5504113	5504531	yes	yes
CHR2	5624267	5624440	yes	yes
CHR2	5627606	5627716	yes	yes
CHR2	5713646	5713806	yes	yes
CHR2	5721717	5722265	yes	yes
CHR2	5722759	5723098	yes	yes
CHR2	5727575	5727841	yes	yes
CHR2	5729582	5729862	yes	yes
CHR2	5731029	5731405	yes	yes
CHR2	5778285	5778949	yes	yes
CHR2	5792843	5793152	yes	yes
CHR2	5797920	5798268	yes	yes
CHR2	5801566	5801788	yes	yes
CHR2	5821769	5821871	yes	yes
CHR2	5861100	5861284	yes	yes
CHR2	5887872	5887998	yes	yes
CHR2	5891824	5892253	yes	yes
CHR2	5892873	5893378	yes	yes
CHR2	5893917	5894838	yes	yes
CHR2	5897359	5897664	yes	yes
CHR2	5898689	5898789	yes	yes
CHR2	5899139	5899701	yes	yes
CHR2	5946989	5947260	yes	yes
CHR2	5964197	5964624	yes	yes
CHR2	5983687	5984211	yes	yes
CHR2	5996709	5997160	yes	yes
CHR2	6007460	6007690	yes	yes
CHR2	6082285	6083021	yes	yes
CHR2	6083451	6083554	yes	yes
CHR2	6128015	6128320	yes	yes
CHR2	6139021	6139418	yes	yes
CHR2	6139748	6139921	yes	yes
CHR2	6141270	6141379	yes	yes
CHR2	6180401	6180599	yes	yes
CHR2	6186810	6187274	yes	yes
CHR2	6232423	6232583	yes	yes
CHR2	6234048	6234160	yes	yes
CHR2	6235687	6235886	yes	yes
CHR2	6256476	6256723	yes	yes
CHR2	6260573	6260677	yes	yes
CHR2	6301341	6301664	yes	yes
CHR2	6325689	6325834	yes	yes
CHR2	6337737	6338091	yes	yes
CHR2	6402653	6402779	yes	yes
CHR2	6412456	6412615	yes	yes
CHR2	6413654	6414123	yes	yes
CHR2	6414447	6414650	yes	yes
CHR2	6433532	6433682	yes	yes
CHR2	6472868	6473088	yes	yes
CHR2	6488669	6488900	yes	yes
CHR2	6497754	6497927	yes	yes
CHR2	6515031	6515319	yes	yes
CHR2	6570136	6570634	yes	yes
CHR2	6596577	6596820	yes	yes
CHR2	6598654	6599204	yes	yes
CHR2	6602657	6603516	yes	yes
CHR2	6624792	6625006	yes	yes
CHR2	6668140	6668240	yes	yes
CHR2	6687159	6687330	yes	yes
CHR2	6842345	6843262	yes	yes
CHR2	6844678	6845055	yes	yes
CHR2	6860201	6860432	yes	yes
CHR2	6967997	6968164	yes	yes
CHR2	7095641	7096095	yes	yes
CHR2	7203393	7203941	yes	yes
CHR2	7448212	7448993	yes	yes
CHR2	7457521	7457639	yes	yes
CHR2	7661544	7661956	yes	yes
CHR2	8100235	8100368	yes	yes
CHR2	8198859	8199239	yes	yes
CHR2	8765719	8766072	yes	yes
CHR2	8822194	8822359	yes	yes
CHR2	9058524	9058639	yes	yes
CHR2	9257676	9257852	yes	yes
CHR2	9312189	9312716	yes	yes
CHR2	9556563	9556818	yes	yes
CHR2	9557236	9558327	yes	yes
CHR2	9639804	9640199	yes	yes
CHR2	9713342	9713551	yes	yes
CHR2	10149038	10149144	yes	yes
CHR2	10278104	10278280	yes	yes
CHR2	10289627	10289821	yes	yes
CHR2	10521339	10521600	yes	yes
CHR2	11508705	11509014	yes	yes
CHR2	11544527	11544762	yes	yes
CHR2	11964244	11964406	yes	yes
CHR2	12413887	12414049	yes	yes
CHR2	12571718	12571879	yes	yes
CHR2	12708629	12708747	yes	yes
CHR2	12736592	12736744	yes	yes
CHR2	13031525	13032506	yes	yes
CHR2	13374559	13374671	yes	yes
CHR2	13493051	13493669	yes	yes
CHR2	14164094	14164311	yes	yes
CHR2	14859119	14859222	yes	yes
CHR2	14907488	14907597	yes	yes
CHR2	15134607	15134759	yes	yes
CHR2	15821740	15821888	yes	yes
CHR2	16537720	16537946	yes	yes
CHR3	2031341	2031521	yes	yes
CHR3	2063282	2063473	yes	yes
CHR3	3205241	3205485	yes	yes
CHR3	3685671	3685798	yes	yes
CHR3	3837060	3837302	yes	yes
CHR3	3837811	3837955	yes	yes
CHR3	4287870	4287973	yes	yes
CHR3	5157171	5157330	yes	yes
CHR3	5672137	5672314	yes	yes
CHR3	7566056	7566403	yes	yes
CHR3	7772794	7772904	yes	yes
CHR3	7800116	7800268	yes	yes
CHR3	7880862	7881007	yes	yes
CHR3	8132724	8132824	yes	yes
CHR3	8452543	8452720	yes	yes
CHR3	8758751	8758974	yes	yes
CHR3	8849355	8849811	yes	yes
CHR3	8857913	8858208	yes	yes
CHR3	8983967	8984088	yes	yes
CHR3	9130682	9130835	yes	yes
CHR3	9225134	9225307	yes	yes
CHR3	9231645	9231903	yes	yes
CHR3	9618721	9618846	yes	yes
CHR3	9729447	9729608	yes	yes
CHR3	9732207	9732617	yes	yes
CHR3	9869116	9869219	yes	yes
CHR3	10005053	10005308	yes	yes
CHR3	10038852	10039179	yes	yes
CHR3	10215611	10215777	yes	yes
CHR3	10234621	10234741	yes	yes
CHR3	10359017	10359363	yes	yes
CHR3	10394946	10395060	yes	yes
CHR3	10644755	10645911	yes	yes
CHR3	10719365	10720013	yes	yes
CHR3	10781882	10782100	yes	yes
CHR3	10808018	10808120	yes	yes
CHR3	10835768	10836229	yes	yes
CHR3	10854257	10854368	yes	yes
CHR3	11115741	11116000	yes	yes
CHR3	11178810	11178924	yes	yes
CHR3	11179265	11179615	yes	yes
CHR3	11180085	11180313	yes	yes
CHR3	11197315	11197494	yes	yes
CHR3	11232531	11233390	yes	yes
CHR3	11434426	11434751	yes	yes
CHR3	11443831	11444567	yes	yes
CHR3	11458953	11459418	yes	yes
CHR3	11475639	11475929	yes	yes
CHR3	11476864	11477055	yes	yes
CHR3	11513507	11514038	yes	yes
CHR3	11519165	11519303	yes	yes
CHR3	11521750	11521893	yes	yes
CHR3	11562659	11562786	yes	yes
CHR3	11565980	11566169	yes	yes
CHR3	11569632	11569843	yes	yes
CHR3	11577624	11578685	yes	yes
CHR3	11596683	11597355	yes	yes
CHR3	11613113	11613768	yes	yes
CHR3	11620010	11620224	yes	yes
CHR3	11620748	11621601	yes	yes
CHR3	11629249	11629481	yes	yes
CHR3	11644017	11644829	yes	yes
CHR3	11665148	11665309	yes	yes
CHR3	11668486	11668591	yes	yes
CHR3	11669369	11669975	yes	yes
CHR3	11675905	11676421	yes	yes
CHR3	11679068	11679313	yes	yes
CHR3	11683609	11684141	yes	yes
CHR3	11689716	11689839	yes	yes
CHR3	11732933	11733079	yes	yes
CHR3	11735340	11735492	yes	yes
CHR3	11775156	11775442	yes	yes
CHR3	11775949	11777263	yes	yes
CHR3	11841253	11841496	yes	yes
CHR3	11854288	11854469	yes	yes
CHR3	11878583	11878790	yes	yes
CHR3	11884331	11885723	yes	yes
CHR3	11920436	11920625	yes	yes
CHR3	11934540	11934941	yes	yes
CHR3	11944624	11945175	yes	yes
CHR3	11948348	11948461	yes	yes
CHR3	11980647	11980832	yes	yes
CHR3	12060924	12061609	yes	yes
CHR3	12066315	12066562	yes	yes
CHR3	12080673	12081127	yes	yes
CHR3	12083370	12083518	yes	yes
CHR3	12087202	12087816	yes	yes
CHR3	12088175	12088340	yes	yes
CHR3	12096255	12096357	yes	yes
CHR3	12103681	12103836	yes	yes
CHR3	12145657	12146157	yes	yes
CHR3	12154894	12155499	yes	yes
CHR3	12179563	12179752	yes	yes
CHR3	12234941	12235370	yes	yes
CHR3	12236131	12236487	yes	yes
CHR3	12255300	12255423	yes	yes
CHR3	12267691	12268210	yes	yes
CHR3	12271248	12271466	yes	yes
CHR3	12273333	12273794	yes	yes
CHR3	12275263	12275556	yes	yes
CHR3	12309660	12310118	yes	yes
CHR3	12312578	12312784	yes	yes
CHR3	12327046	12327305	yes	yes
CHR3	12333022	12333467	yes	yes
CHR3	12384654	12385133	yes	yes
CHR3	12399526	12399636	yes	yes
CHR3	12418089	12418484	yes	yes
CHR3	12421145	12421440	yes	yes
CHR3	12445793	12445981	yes	yes
CHR3	12461513	12461760	yes	yes
CHR3	12469200	12469442	yes	yes
CHR3	12477566	12477698	yes	yes
CHR3	12604084	12604255	yes	yes
CHR3	12604821	12605346	yes	yes
CHR3	12606473	12606932	yes	yes
CHR3	12607991	12608495	yes	yes
CHR3	12622027	12622163	yes	yes
CHR3	12627105	12627444	yes	yes
CHR3	12627750	12627872	yes	yes
CHR3	12628995	12629457	yes	yes
CHR3	12640868	12640968	yes	yes
CHR3	12645681	12645811	yes	yes
CHR3	12649174	12649445	yes	yes
CHR3	12680611	12680736	yes	yes
CHR3	12685938	12686080	yes	yes
CHR3	12701961	12702247	yes	yes
CHR3	12731663	12732069	yes	yes
CHR3	12740419	12741347	yes	yes
CHR3	12770684	12770955	yes	yes
CHR3	12779907	12780211	yes	yes
CHR3	12807594	12807747	yes	yes
CHR3	12820322	12820762	yes	yes
CHR3	12833583	12834659	yes	yes
CHR3	12835996	12836218	yes	yes
CHR3	12876561	12876674	yes	yes
CHR3	12880746	12881102	yes	yes
CHR3	12890619	12890959	yes	yes
CHR3	12901644	12901800	yes	yes
CHR3	12913199	12913722	yes	yes
CHR3	12914965	12915498	yes	yes
CHR3	12919599	12919725	yes	yes
CHR3	12927372	12927925	yes	yes
CHR3	12981116	12981528	yes	yes
CHR3	12982153	12982425	yes	yes
CHR3	12996431	12996845	yes	yes
CHR3	12999249	13000458	yes	yes
CHR3	13000946	13001481	yes	yes
CHR3	13037537	13038586	yes	yes
CHR3	13040198	13040718	yes	yes
CHR3	13041394	13041896	yes	yes
CHR3	13068545	13068705	yes	yes
CHR3	13131903	13132062	yes	yes
CHR3	13136913	13137359	yes	yes
CHR3	13142680	13143072	yes	yes
CHR3	13144879	13145321	yes	yes
CHR3	13162934	13163161	yes	yes
CHR3	13164801	13165530	yes	yes
CHR3	13201573	13201697	yes	yes
CHR3	13219338	13220014	yes	yes
CHR3	13223762	13224486	yes	yes
CHR3	13266927	13267193	yes	yes
CHR3	13293840	13293951	yes	yes
CHR3	13305205	13305464	yes	yes
CHR3	13306215	13306354	yes	yes
CHR3	13323635	13323756	yes	yes
CHR3	13335993	13336627	yes	yes
CHR3	13336962	13337237	yes	yes
CHR3	13341970	13342764	yes	yes
CHR3	13350476	13350580	yes	yes
CHR3	13356319	13356542	yes	yes
CHR3	13374330	13374491	yes	yes
CHR3	13384170	13384836	yes	yes
CHR3	13387492	13387747	yes	yes
CHR3	13449987	13450088	yes	yes
CHR3	13452577	13452796	yes	yes
CHR3	13457548	13457708	yes	yes
CHR3	13467048	13467370	yes	yes
CHR3	13513555	13513766	yes	yes
CHR3	13524331	13524446	yes	yes
CHR3	13537140	13537277	yes	yes
CHR3	13538088	13538523	yes	yes
CHR3	13539659	13539939	yes	yes
CHR3	13540448	13541414	yes	yes
CHR3	13560125	13560296	yes	yes
CHR3	13561250	13561797	yes	yes
CHR3	13573647	13573860	yes	yes
CHR3	13957023	13957285	yes	yes
CHR3	13983474	13983772	yes	yes
CHR3	13984456	13985227	yes	yes
CHR3	13985611	13985857	yes	yes
CHR3	13990214	13990380	yes	yes
CHR3	14045656	14046128	yes	yes
CHR3	14057295	14057416	yes	yes
CHR3	14057983	14058153	yes	yes
CHR3	14084370	14084619	yes	yes
CHR3	14274267	14274519	yes	yes
CHR3	14274942	14275463	yes	yes
CHR3	14276772	14277110	yes	yes
CHR3	14281308	14281851	yes	yes
CHR3	14284849	14285081	yes	yes
CHR3	14288129	14288690	yes	yes
CHR3	14289526	14289786	yes	yes
CHR3	14290129	14290333	yes	yes
CHR3	14329744	14330078	yes	yes
CHR3	14336296	14336964	yes	yes
CHR3	14369563	14370275	yes	yes
CHR3	14373047	14373413	yes	yes
CHR3	14380024	14380344	yes	yes
CHR3	14388191	14389137	yes	yes
CHR3	14459965	14460122	yes	yes
CHR3	14471604	14471871	yes	yes
CHR3	14480810	14481197	yes	yes
CHR3	14490013	14490665	yes	yes
CHR3	14517595	14517745	yes	yes
CHR3	14518700	14518952	yes	yes
CHR3	14531472	14531652	yes	yes
CHR3	14534516	14534632	yes	yes
CHR3	14536905	14537637	yes	yes
CHR3	14576496	14577469	yes	yes
CHR3	14589498	14589834	yes	yes
CHR3	14612893	14613020	yes	yes
CHR3	14627988	14628101	yes	yes
CHR3	14630576	14630796	yes	yes
CHR3	14647471	14647637	yes	yes
CHR3	14685437	14685545	yes	yes
CHR3	14698780	14699103	yes	yes
CHR3	14711269	14711460	yes	yes
CHR3	14723525	14723710	yes	yes
CHR3	14743372	14743878	yes	yes
CHR3	14763302	14763728	yes	yes
CHR3	14764847	14764954	yes	yes
CHR3	14773697	14774413	yes	yes
CHR3	14782629	14782829	yes	yes
CHR3	14785554	14785897	yes	yes
CHR3	14882682	14882789	yes	yes
CHR3	14890056	14890997	yes	yes
CHR3	14898998	14899318	yes	yes
CHR3	14901628	14901858	yes	yes
CHR3	14916757	14916964	yes	yes
CHR3	14938575	14938980	yes	yes
CHR3	14967118	14967407	yes	yes
CHR3	14969201	14969488	yes	yes
CHR3	14975201	14975921	yes	yes
CHR3	14987664	14987827	yes	yes
CHR3	15010175	15010292	yes	yes
CHR3	15011309	15011539	yes	yes
CHR3	15027130	15027269	yes	yes
CHR3	15052503	15052663	yes	yes
CHR3	15085103	15085487	yes	yes
CHR3	15087844	15088039	yes	yes
CHR3	15097975	15098381	yes	yes
CHR3	15100257	15100566	yes	yes
CHR3	15131650	15132643	yes	yes
CHR3	15221269	15221369	yes	yes
CHR3	15270888	15271014	yes	yes
CHR3	15282183	15282340	yes	yes
CHR3	15282761	15283314	yes	yes
CHR3	15284801	15285007	yes	yes
CHR3	15286223	15286667	yes	yes
CHR3	15287414	15287564	yes	yes
CHR3	15289072	15289611	yes	yes
CHR3	15290310	15290455	yes	yes
CHR3	15290759	15291737	yes	yes
CHR3	15296579	15296685	yes	yes
CHR3	15312228	15312966	yes	yes
CHR3	15325485	15325927	yes	yes
CHR3	15393754	15394223	yes	yes
CHR3	15395154	15396421	yes	yes
CHR3	15408057	15408230	yes	yes
CHR3	15412178	15412287	yes	yes
CHR3	15416061	15416404	yes	yes
CHR3	15442295	15442572	yes	yes
CHR3	15446855	15447715	yes	yes
CHR3	15454485	15455102	yes	yes
CHR3	15455467	15455698	yes	yes
CHR3	15469824	15470826	yes	yes
CHR3	15500540	15500832	yes	yes
CHR3	15591208	15591741	yes	yes
CHR3	15628938	15629356	yes	yes
CHR3	15729297	15730244	yes	yes
CHR3	15735693	15735838	yes	yes
CHR3	15794402	15794781	yes	yes
CHR3	15806027	15806171	yes	yes
CHR3	15831601	15831967	yes	yes
CHR3	15864659	15864783	yes	yes
CHR3	15917008	15917599	yes	yes
CHR3	15963928	15964146	yes	yes
CHR3	16104015	16105282	yes	yes
CHR3	16202098	16202258	yes	yes
CHR3	16333662	16333765	yes	yes
CHR3	16527675	16527777	yes	yes
CHR3	16538082	16538203	yes	yes
CHR3	16943097	16943561	yes	yes
CHR3	17120986	17121113	yes	yes
CHR3	17205934	17206134	yes	yes
CHR3	17408628	17408953	yes	yes
CHR3	17414234	17414445	yes	yes
CHR3	17864372	17864670	yes	yes
CHR3	17928535	17928657	yes	yes
CHR3	18111526	18111698	yes	yes
CHR3	18747125	18747272	yes	yes
CHR3	18799709	18799840	yes	yes
CHR3	18927438	18927633	yes	yes
CHR3	19134582	19134685	yes	yes
CHR3	19635298	19635510	yes	yes
CHR3	19667967	19668086	yes	yes
CHR3	20664360	20664690	yes	yes
CHR3	20957738	20957850	yes	yes
CHR3	21325744	21325853	yes	yes
CHR3	21436606	21436728	yes	yes
CHR3	21968354	21968548	yes	yes
CHR3	22465157	22465297	yes	yes
CHR3	22524531	22524801	yes	yes
CHR3	22585595	22585899	yes	yes
CHR3	22748129	22748234	yes	yes
CHR3	23085783	23085950	yes	yes
CHR4	144804	145240	yes	yes
CHR4	298513	298852	yes	yes
CHR4	664407	664891	yes	yes
CHR4	665224	665649	yes	yes
CHR4	944772	944874	yes	yes
CHR4	963687	963985	yes	yes
CHR4	1027222	1027486	yes	yes
CHR4	1236627	1236738	yes	yes
CHR4	1315270	1315423	yes	yes
CHR4	1565628	1565964	yes	yes
CHR4	1616474	1616648	yes	yes
CHR4	1617000	1617404	yes	yes
CHR4	1629365	1629716	yes	yes
CHR4	1637309	1637411	yes	yes
CHR4	1638229	1638487	yes	yes
CHR4	1640396	1640564	yes	yes
CHR4	1652633	1653023	yes	yes
CHR4	1654629	1655218	yes	yes
CHR4	1664927	1665029	yes	yes
CHR4	1704263	1704387	yes	yes
CHR4	1742449	1743104	yes	yes
CHR4	1761261	1761432	yes	yes
CHR4	1766337	1766460	yes	yes
CHR4	1775278	1775378	yes	yes
CHR4	1820326	1820771	yes	yes
CHR4	1822961	1823091	yes	yes
CHR4	1835650	1836211	yes	yes
CHR4	1850991	1851181	yes	yes
CHR4	1855264	1855568	yes	yes
CHR4	1902043	1902390	yes	yes
CHR4	1903612	1904228	yes	yes
CHR4	1913828	1915065	yes	yes
CHR4	1926395	1926637	yes	yes
CHR4	1938623	1938892	yes	yes
CHR4	1966068	1966263	yes	yes
CHR4	1967833	1968048	yes	yes
CHR4	1976870	1977113	yes	yes
CHR4	1983389	1984034	yes	yes
CHR4	1989542	1989918	yes	yes
CHR4	1995852	1996759	yes	yes
CHR4	2043017	2043185	yes	yes
CHR4	2043492	2043792	yes	yes
CHR4	2044775	2044997	yes	yes
CHR4	2070920	2071486	yes	yes
CHR4	2081061	2081163	yes	yes
CHR4	2090794	2091248	yes	yes
CHR4	2101198	2101885	yes	yes
CHR4	2103853	2105308	yes	yes
CHR4	2105723	2105871	yes	yes
CHR4	2142141	2142658	yes	yes
CHR4	2144997	2145100	yes	yes
CHR4	2145562	2146123	yes	yes
CHR4	2147121	2147825	yes	yes
CHR4	2175998	2176426	yes	yes
CHR4	2186482	2186643	yes	yes
CHR4	2190852	2191406	yes	yes
CHR4	2253634	2253803	yes	yes
CHR4	2277793	2277897	yes	yes
CHR4	2286457	2286927	yes	yes
CHR4	2300663	2300801	yes	yes
CHR4	2317031	2317182	yes	yes
CHR4	2335515	2335764	yes	yes
CHR4	2596753	2596870	yes	yes
CHR4	2601867	2602387	yes	yes
CHR4	2604131	2604802	yes	yes
CHR4	2605229	2605535	yes	yes
CHR4	2643259	2643463	yes	yes
CHR4	2648552	2648934	yes	yes
CHR4	2663523	2663783	yes	yes
CHR4	2689591	2689698	yes	yes
CHR4	2696491	2696783	yes	yes
CHR4	2789237	2789392	yes	yes
CHR4	2790364	2790712	yes	yes
CHR4	2812800	2813783	yes	yes
CHR4	2842214	2842408	yes	yes
CHR4	2842728	2842949	yes	yes
CHR4	2843865	2844439	yes	yes
CHR4	2844816	2845386	yes	yes
CHR4	2846030	2846355	yes	yes
CHR4	2849863	2850222	yes	yes
CHR4	2862732	2862909	yes	yes
CHR4	2901205	2901330	yes	yes
CHR4	2903191	2903698	yes	yes
CHR4	2998686	2998817	yes	yes
CHR4	3124934	3125035	yes	yes
CHR4	3299600	3299744	yes	yes
CHR4	3308894	3309063	yes	yes
CHR4	3329741	3330693	yes	yes
CHR4	3369450	3371130	yes	yes
CHR4	3371574	3371786	yes	yes
CHR4	3407277	3407809	yes	yes
CHR4	3417949	3418913	yes	yes
CHR4	3430213	3430683	yes	yes
CHR4	3514238	3514441	yes	yes
CHR4	3517666	3518181	yes	yes
CHR4	3597304	3597659	yes	yes
CHR4	3603458	3603703	yes	yes
CHR4	3670772	3670951	yes	yes
CHR4	3719199	3719744	yes	yes
CHR4	3726348	3726538	yes	yes
CHR4	3729057	3729324	yes	yes
CHR4	3729953	3730079	yes	yes
CHR4	3757721	3757853	yes	yes
CHR4	3775617	3776139	yes	yes
CHR4	3802797	3803027	yes	yes
CHR4	3807228	3807386	yes	yes
CHR4	3807726	3809051	yes	yes
CHR4	3809449	3809730	yes	yes
CHR4	3810041	3810440	yes	yes
CHR4	3816017	3816316	yes	yes
CHR4	3816696	3817263	yes	yes
CHR4	3818492	3818622	yes	yes
CHR4	3819764	3819868	yes	yes
CHR4	3820245	3820516	yes	yes
CHR4	3822798	3823348	yes	yes
CHR4	3853587	3853768	yes	yes
CHR4	3879129	3879281	yes	yes
CHR4	3892608	3892835	yes	yes
CHR4	3949382	3949788	yes	yes
CHR4	4084580	4084938	yes	yes
CHR4	4085635	4085879	yes	yes
CHR4	4108362	4108567	yes	yes
CHR4	4109727	4109841	yes	yes
CHR4	4129016	4129175	yes	yes
CHR4	4131409	4131543	yes	yes
CHR4	4131977	4132184	yes	yes
CHR4	4155183	4155372	yes	yes
CHR4	4163207	4163791	yes	yes
CHR4	4166295	4166567	yes	yes
CHR4	4167296	4167939	yes	yes
CHR4	4224460	4225345	yes	yes
CHR4	4230217	4230514	yes	yes
CHR4	4234611	4234814	yes	yes
CHR4	4238346	4238619	yes	yes
CHR4	4264501	4265596	yes	yes
CHR4	4293354	4294183	yes	yes
CHR4	4333050	4333302	yes	yes
CHR4	4398862	4399643	yes	yes
CHR4	4447741	4447961	yes	yes
CHR4	4456467	4456717	yes	yes
CHR4	4550671	4550837	yes	yes
CHR4	4588143	4589397	yes	yes
CHR4	4589806	4590069	yes	yes
CHR4	4591988	4592231	yes	yes
CHR4	4605798	4606070	yes	yes
CHR4	4614341	4614674	yes	yes
CHR4	4618569	4619031	yes	yes
CHR4	4631227	4631710	yes	yes
CHR4	4634995	4635190	yes	yes
CHR4	4635860	4636147	yes	yes
CHR4	4638218	4638352	yes	yes
CHR4	4639631	4639850	yes	yes
CHR4	4665717	4666034	yes	yes
CHR4	4751208	4751737	yes	yes
CHR4	4784930	4785072	yes	yes
CHR4	4788585	4789282	yes	yes
CHR4	4818114	4818850	yes	yes
CHR4	4832945	4833432	yes	yes
CHR4	4838828	4839446	yes	yes
CHR4	4857357	4857690	yes	yes
CHR4	4862211	4863289	yes	yes
CHR4	4889762	4890394	yes	yes
CHR4	4917167	4917268	yes	yes
CHR4	4918015	4918672	yes	yes
CHR4	4924124	4924337	yes	yes
CHR4	4934497	4934741	yes	yes
CHR4	4950535	4950664	yes	yes
CHR4	4951354	4951495	yes	yes
CHR4	4955369	4956103	yes	yes
CHR4	4970392	4970507	yes	yes
CHR4	4983720	4983883	yes	yes
CHR4	4985459	4985651	yes	yes
CHR4	5002817	5003471	yes	yes
CHR4	5010899	5011433	yes	yes
CHR4	5015397	5015658	yes	yes
CHR4	5128978	5129079	yes	yes
CHR4	5214012	5214191	yes	yes
CHR4	5224547	5224674	yes	yes
CHR4	5259031	5259464	yes	yes
CHR4	5261652	5261886	yes	yes
CHR4	5264756	5265242	yes	yes
CHR4	5268625	5269055	yes	yes
CHR4	5271472	5271593	yes	yes
CHR4	5319498	5319706	yes	yes
CHR4	5371656	5371767	yes	yes
CHR4	5389051	5389265	yes	yes
CHR4	5420791	5420957	yes	yes
CHR4	5476863	5477269	yes	yes
CHR4	5478143	5478441	yes	yes
CHR4	5480035	5480403	yes	yes
CHR4	5487439	5488041	yes	yes
CHR4	5493952	5494097	yes	yes
CHR4	5514261	5514676	yes	yes
CHR4	5523743	5524278	yes	yes
CHR4	5524684	5525236	yes	yes
CHR4	5529127	5529373	yes	yes
CHR4	5531487	5532022	yes	yes
CHR4	5560346	5560470	yes	yes
CHR4	5564615	5564843	yes	yes
CHR4	5570541	5570748	yes	yes
CHR4	5591288	5591561	yes	yes
CHR4	5627274	5627567	yes	yes
CHR4	5628038	5629560	yes	yes
CHR4	5650595	5651094	yes	yes
CHR4	5653157	5653696	yes	yes
CHR4	5665702	5665842	yes	yes
CHR4	5691156	5691266	yes	yes
CHR4	5773505	5773678	yes	yes
CHR4	5794053	5794344	yes	yes
CHR4	5857436	5857593	yes	yes
CHR4	5870281	5870395	yes	yes
CHR4	5892093	5892293	yes	yes
CHR4	5901005	5901262	yes	yes
CHR4	5919392	5919496	yes	yes
CHR4	5937465	5937634	yes	yes
CHR4	5947735	5947904	yes	yes
CHR4	5954909	5955236	yes	yes
CHR4	5980170	5980398	yes	yes
CHR4	5997082	5997824	yes	yes
CHR4	5999842	6000270	yes	yes
CHR4	6001706	6002534	yes	yes
CHR4	6002978	6003102	yes	yes
CHR4	6003919	6004321	yes	yes
CHR4	6005251	6005375	yes	yes
CHR4	6006397	6007089	yes	yes
CHR4	6020804	6020963	yes	yes
CHR4	6028220	6028546	yes	yes
CHR4	6063884	6064129	yes	yes
CHR4	6114823	6114973	yes	yes
CHR4	6167010	6167132	yes	yes
CHR4	6205913	6206239	yes	yes
CHR4	6211415	6211830	yes	yes
CHR4	6212294	6212486	yes	yes
CHR4	6283704	6283807	yes	yes
CHR4	6342914	6343023	yes	yes
CHR4	6411888	6412090	yes	yes
CHR4	6579278	6579416	yes	yes
CHR4	6597761	6597973	yes	yes
CHR4	6599471	6599914	yes	yes
CHR4	6748712	6749125	yes	yes
CHR4	7013442	7013570	yes	yes
CHR4	7214304	7214561	yes	yes
CHR4	7348037	7348175	yes	yes
CHR4	7550853	7550954	yes	yes
CHR4	7558324	7558451	yes	yes
CHR4	7624888	7625009	yes	yes
CHR4	8088095	8088220	yes	yes
CHR4	8591686	8591927	yes	yes
CHR4	8772249	8772418	yes	yes
CHR4	8772760	8772981	yes	yes
CHR4	9074388	9074710	yes	yes
CHR4	9078904	9079054	yes	yes
CHR4	9188878	9188981	yes	yes
CHR4	9338788	9339145	yes	yes
CHR4	9370661	9370915	yes	yes
CHR4	9486676	9486828	yes	yes
CHR4	9522234	9522476	yes	yes
CHR4	9541755	9541949	yes	yes
CHR4	9800921	9801198	yes	yes
CHR4	9927916	9928036	yes	yes
CHR4	9954516	9954822	yes	yes
CHR4	10050764	10050975	yes	yes
CHR4	10156804	10156913	yes	yes
CHR4	10268092	10268204	yes	yes
CHR4	10493018	10493142	yes	yes
CHR4	10543780	10544193	yes	yes
CHR4	10649109	10649266	yes	yes
CHR4	10901347	10901450	yes	yes
CHR4	11148246	11148415	yes	yes
CHR4	11149013	11149134	yes	yes
CHR4	11655256	11655363	yes	yes
CHR4	11765074	11765180	yes	yes
CHR4	11829095	11829325	yes	yes
CHR4	11946273	11946488	yes	yes
CHR4	12008185	12008425	yes	yes
CHR4	12093676	12094130	yes	yes
CHR4	12485909	12486062	yes	yes
CHR4	15626949	15627227	yes	yes
CHR4	15912684	15912821	yes	yes
CHR4	17713856	17714023	yes	yes
CHR5	491934	492067	yes	yes
CHR5	661065	661187	yes	yes
CHR5	1063518	1063674	yes	yes
CHR5	1181912	1182017	yes	yes
CHR5	2296715	2296825	yes	yes
CHR5	2791239	2791409	yes	yes
CHR5	4165814	4165936	yes	yes
CHR5	5281694	5281884	yes	yes
CHR5	5646405	5646790	yes	yes
CHR5	6439015	6439214	yes	yes
CHR5	7185068	7185231	yes	yes
CHR5	7413933	7414285	yes	yes
CHR5	8045700	8045802	yes	yes
CHR5	8272752	8272857	yes	yes
CHR5	8728489	8728600	yes	yes
CHR5	9008486	9008613	yes	yes
CHR5	9013549	9013688	yes	yes
CHR5	9061511	9061656	yes	yes
CHR5	9179335	9179870	yes	yes
CHR5	9708725	9709034	yes	yes
CHR5	9760469	9760572	yes	yes
CHR5	9806738	9807015	yes	yes
CHR5	9955240	9955575	yes	yes
CHR5	9968479	9968603	yes	yes
CHR5	10041256	10041408	yes	yes
CHR5	10056137	10056335	yes	yes
CHR5	10075156	10076017	yes	yes
CHR5	10088680	10088842	yes	yes
CHR5	10143077	10143197	yes	yes
CHR5	10169686	10170556	yes	yes
CHR5	10222625	10222777	yes	yes
CHR5	10224937	10225142	yes	yes
CHR5	10231136	10231260	yes	yes
CHR5	10387408	10387508	yes	yes
CHR5	10387891	10388188	yes	yes
CHR5	10406066	10406317	yes	yes
CHR5	10406678	10406795	yes	yes
CHR5	10410104	10410403	yes	yes
CHR5	10414956	10415920	yes	yes
CHR5	10416512	10416985	yes	yes
CHR5	10417758	10418003	yes	yes
CHR5	10418455	10419308	yes	yes
CHR5	10425152	10425530	yes	yes
CHR5	10440155	10440595	yes	yes
CHR5	10442802	10442919	yes	yes
CHR5	10467589	10468289	yes	yes
CHR5	10502683	10503294	yes	yes
CHR5	10533893	10534969	yes	yes
CHR5	10559613	10560662	yes	yes
CHR5	10560973	10561732	yes	yes
CHR5	10586955	10587194	yes	yes
CHR5	10597564	10597711	yes	yes
CHR5	10598714	10598875	yes	yes
CHR5	10602143	10602750	yes	yes
CHR5	10603470	10604946	yes	yes
CHR5	10606933	10607436	yes	yes
CHR5	10611975	10612077	yes	yes
CHR5	10620600	10620849	yes	yes
CHR5	10667419	10667542	yes	yes
CHR5	10667987	10668214	yes	yes
CHR5	10685879	10686086	yes	yes
CHR5	10692632	10693106	yes	yes
CHR5	10696117	10696431	yes	yes
CHR5	10696817	10697156	yes	yes
CHR5	10697511	10697660	yes	yes
CHR5	10699098	10699465	yes	yes
CHR5	10699856	10700488	yes	yes
CHR5	10701293	10701533	yes	yes
CHR5	10753929	10754106	yes	yes
CHR5	10759029	10759498	yes	yes
CHR5	10779818	10780215	yes	yes
CHR5	10791034	10791158	yes	yes
CHR5	10807491	10807735	yes	yes
CHR5	10814735	10814850	yes	yes
CHR5	10822158	10822770	yes	yes
CHR5	10830266	10830705	yes	yes
CHR5	10832429	10832578	yes	yes
CHR5	10833380	10833514	yes	yes
CHR5	10843615	10844257	yes	yes
CHR5	10853534	10853772	yes	yes
CHR5	10884213	10884576	yes	yes
CHR5	10893390	10893884	yes	yes
CHR5	10896857	10897354	yes	yes
CHR5	10897687	10898005	yes	yes
CHR5	10900090	10900302	yes	yes
CHR5	10903246	10904015	yes	yes
CHR5	10906395	10906557	yes	yes
CHR5	10912781	10912884	yes	yes
CHR5	10913602	10915432	yes	yes
CHR5	10947731	10948122	yes	yes
CHR5	10962977	10963871	yes	yes
CHR5	10966192	10966316	yes	yes
CHR5	10973494	10974041	yes	yes
CHR5	10981419	10981582	yes	yes
CHR5	10988362	10988625	yes	yes
CHR5	10990222	10990332	yes	yes
CHR5	11007564	11008006	yes	yes
CHR5	11008499	11008768	yes	yes
CHR5	11009447	11010516	yes	yes
CHR5	11011320	11011677	yes	yes
CHR5	11012353	11012644	yes	yes
CHR5	11031460	11031605	yes	yes
CHR5	11034191	11034334	yes	yes
CHR5	11035009	11035204	yes	yes
CHR5	11037121	11037701	yes	yes
CHR5	11063554	11064059	yes	yes
CHR5	11065097	11065326	yes	yes
CHR5	11066313	11067253	yes	yes
CHR5	11193459	11193717	yes	yes
CHR5	11220880	11221319	yes	yes
CHR5	11278931	11280103	yes	yes
CHR5	11280631	11281444	yes	yes
CHR5	11281766	11281984	yes	yes
CHR5	11288666	11289047	yes	yes
CHR5	11292658	11293040	yes	yes
CHR5	11300964	11301316	yes	yes
CHR5	11301702	11302168	yes	yes
CHR5	11416344	11416495	yes	yes
CHR5	11416922	11417289	yes	yes
CHR5	11418495	11418989	yes	yes
CHR5	11419779	11420912	yes	yes
CHR5	11492568	11492808	yes	yes
CHR5	11493940	11494086	yes	yes
CHR5	11495292	11495417	yes	yes
CHR5	11500634	11500937	yes	yes
CHR5	11525981	11526132	yes	yes
CHR5	11538370	11538804	yes	yes
CHR5	11539184	11539629	yes	yes
CHR5	11540361	11541211	yes	yes
CHR5	11545819	11546413	yes	yes
CHR5	11636550	11636650	yes	yes
CHR5	11663409	11664071	yes	yes
CHR5	11738817	11738918	yes	yes
CHR5	12075269	12075782	yes	yes
CHR5	12092934	12093037	yes	yes
CHR5	12093968	12095173	yes	yes
CHR5	12183888	12184326	yes	yes
CHR5	12208348	12208653	yes	yes
CHR5	12268084	12268185	yes	yes
CHR5	12277035	12277705	yes	yes
CHR5	12285922	12286161	yes	yes
CHR5	12324707	12324891	yes	yes
CHR5	12381663	12381786	yes	yes
CHR5	12384327	12384640	yes	yes
CHR5	12387641	12387768	yes	yes
CHR5	12390062	12390305	yes	yes
CHR5	12392758	12392862	yes	yes
CHR5	12424479	12424674	yes	yes
CHR5	12426795	12427160	yes	yes
CHR5	12436661	12437324	yes	yes
CHR5	12441145	12441383	yes	yes
CHR5	12446080	12447078	yes	yes
CHR5	12457239	12457549	yes	yes
CHR5	12466575	12466677	yes	yes
CHR5	12467191	12467345	yes	yes
CHR5	12486417	12486597	yes	yes
CHR5	12510869	12511830	yes	yes
CHR5	12541842	12541971	yes	yes
CHR5	12544639	12544770	yes	yes
CHR5	12607351	12607589	yes	yes
CHR5	12781416	12781675	yes	yes
CHR5	12913703	12913853	yes	yes
CHR5	12981687	12982828	yes	yes
CHR5	13049637	13050624	yes	yes
CHR5	13057522	13058032	yes	yes
CHR5	13097508	13097734	yes	yes
CHR5	13112814	13113147	yes	yes
CHR5	13137639	13138517	yes	yes
CHR5	13212503	13212651	yes	yes
CHR5	13213410	13213753	yes	yes
CHR5	13215517	13215944	yes	yes
CHR5	13228535	13229090	yes	yes
CHR5	13345366	13346005	yes	yes
CHR5	13383909	13384462	yes	yes
CHR5	13389483	13390927	yes	yes
CHR5	13418820	13419011	yes	yes
CHR5	13438924	13439553	yes	yes
CHR5	13440258	13440784	yes	yes
CHR5	13442721	13442935	yes	yes
CHR5	13444785	13445082	yes	yes
CHR5	13446302	13446775	yes	yes
CHR5	13450288	13450389	yes	yes
CHR5	13453932	13454270	yes	yes
CHR5	13456402	13456714	yes	yes
CHR5	13457020	13457127	yes	yes
CHR5	13457540	13458708	yes	yes
CHR5	13459855	13460093	yes	yes
CHR5	13461632	13462094	yes	yes
CHR5	13502353	13502508	yes	yes
CHR5	13505283	13505916	yes	yes
CHR5	13511871	13512179	yes	yes
CHR5	13512834	13513131	yes	yes
CHR5	13518699	13518803	yes	yes
CHR5	13534652	13534780	yes	yes
CHR5	13555486	13555714	yes	yes
CHR5	13566782	13566912	yes	yes
CHR5	13680957	13681408	yes	yes
CHR5	13695601	13695964	yes	yes
CHR5	13731167	13731318	yes	yes
CHR5	13744005	13744152	yes	yes
CHR5	13793301	13793776	yes	yes
CHR5	13795032	13795254	yes	yes
CHR5	13828280	13828479	yes	yes
CHR5	13869635	13869847	yes	yes
CHR5	13927249	13928572	yes	yes
CHR5	13943216	13943444	yes	yes
CHR5	13967324	13967460	yes	yes
CHR5	13989795	13989906	yes	yes
CHR5	14012969	14013220	yes	yes
CHR5	14013654	14014049	yes	yes
CHR5	14044750	14044979	yes	yes
CHR5	14045405	14045807	yes	yes
CHR5	14057701	14057832	yes	yes
CHR5	14098974	14099161	yes	yes
CHR5	14100093	14100919	yes	yes
CHR5	14103187	14103584	yes	yes
CHR5	14143717	14143871	yes	yes
CHR5	14164527	14164638	yes	yes
CHR5	14169487	14169821	yes	yes
CHR5	14173910	14174044	yes	yes
CHR5	14208517	14208654	yes	yes
CHR5	14229572	14229672	yes	yes
CHR5	14301943	14302067	yes	yes
CHR5	14309620	14310223	yes	yes
CHR5	14310561	14310792	yes	yes
CHR5	14311322	14311815	yes	yes
CHR5	14316161	14317321	yes	yes
CHR5	14470436	14470538	yes	yes
CHR5	14496806	14497096	yes	yes
CHR5	14508820	14509320	yes	yes
CHR5	14549298	14549472	yes	yes
CHR5	14594433	14594570	yes	yes
CHR5	14627734	14628237	yes	yes
CHR5	14677286	14677596	yes	yes
CHR5	14937357	14937457	yes	yes
CHR5	15141188	15141317	yes	yes
CHR5	15430920	15431129	yes	yes
CHR5	15435693	15436069	yes	yes
CHR5	15640643	15640784	yes	yes
CHR5	15886821	15886929	yes	yes
CHR5	15992971	15993135	yes	yes
CHR5	16203997	16204688	yes	yes
CHR5	16321572	16321700	yes	yes
CHR5	16586210	16586369	yes	yes
CHR5	17090101	17090204	yes	yes
CHR5	17210521	17210673	yes	yes
CHR5	17366996	17367110	yes	yes
CHR5	17558021	17558650	yes	yes
CHR5	17827129	17827233	yes	yes
CHR5	18124815	18125281	yes	yes
CHR5	18127791	18128201	yes	yes
CHR5	18420447	18420790	yes	yes
CHR5	20313960	20314238	yes	yes
CHR5	20314790	20315066	yes	yes
CHR5	20400191	20400313	yes	yes
CHR5	20556411	20556561	yes	yes
CHR5	20631205	20631484	yes	yes
CHR5	21096209	21096390	yes	yes
CHR5	21192926	21193189	yes	yes
CHR5	21488310	21488478	yes	yes
CHR5	21833412	21833566	yes	yes
CHR5	22094221	22094399	yes	yes
CHR5	22322786	22322890	yes	yes
CHR5	24018247	24018583	yes	yes
CHR5	24029495	24029960	yes	yes
CHR5	24346529	24346645	yes	yes
CHR5	24531240	24531382	yes	yes
CHR5	24658523	24658765	yes	yes
CHR5	26787926	26788580	yes	yes
CHR1	31698	31986	no	yes
CHR1	766037	766150	no	yes
CHR1	1990160	1990352	no	yes
CHR1	2209717	2209835	no	yes
CHR1	2836617	2836772	no	yes
CHR1	2937029	2937190	no	yes
CHR1	4369462	4369634	no	yes
CHR1	4623394	4623513	no	yes
CHR1	4960472	4960727	no	yes
CHR1	5537635	5537803	no	yes
CHR1	6524585	6524743	no	yes
CHR1	6559579	6559714	no	yes
CHR1	7586819	7586962	no	yes
CHR1	7837759	7838062	no	yes
CHR1	8066954	8067449	no	yes
CHR1	8664700	8664823	no	yes
CHR1	9127133	9127688	no	yes
CHR1	10265093	10265292	no	yes
CHR1	10433266	10433642	no	yes
CHR1	11613328	11613442	no	yes
CHR1	11652038	11652157	no	yes
CHR1	12313330	12313499	no	yes
CHR1	12316435	12316690	no	yes
CHR1	12409355	12409611	no	yes
CHR1	12630495	12630597	no	yes
CHR1	12667921	12668180	no	yes
CHR1	12744671	12744883	no	yes
CHR1	12797995	12798142	no	yes
CHR1	12827290	12827458	no	yes
CHR1	12865462	12865658	no	yes
CHR1	12993022	12993140	no	yes
CHR1	13012028	13012309	no	yes
CHR1	13021062	13021166	no	yes
CHR1	13137956	13138083	no	yes
CHR1	13174171	13174315	no	yes
CHR1	13231809	13232113	no	yes
CHR1	13265806	13266128	no	yes
CHR1	13267862	13268047	no	yes
CHR1	13285609	13286212	no	yes
CHR1	13288259	13288360	no	yes
CHR1	13297151	13297830	no	yes
CHR1	13300274	13300692	no	yes
CHR1	13312353	13312513	no	yes
CHR1	13377626	13377871	no	yes
CHR1	13392137	13392490	no	yes
CHR1	13393865	13393994	no	yes
CHR1	13405891	13406084	no	yes
CHR1	13429635	13429903	no	yes
CHR1	13564849	13565003	no	yes
CHR1	13608900	13609580	no	yes
CHR1	13636163	13636483	no	yes
CHR1	13654344	13654496	no	yes
CHR1	13656024	13656240	no	yes
CHR1	13674370	13674476	no	yes
CHR1	13739666	13739983	no	yes
CHR1	13740365	13740600	no	yes
CHR1	13763388	13763943	no	yes
CHR1	13802060	13802350	no	yes
CHR1	13868301	13868475	no	yes
CHR1	13871592	13871750	no	yes
CHR1	13893733	13894029	no	yes
CHR1	13910068	13910756	no	yes
CHR1	13933075	13933181	no	yes
CHR1	13963540	13963786	no	yes
CHR1	13967542	13967919	no	yes
CHR1	13975284	13975525	no	yes
CHR1	14011150	14011254	no	yes
CHR1	14070784	14070937	no	yes
CHR1	14082186	14082351	no	yes
CHR1	14097652	14097844	no	yes
CHR1	14117848	14118301	no	yes
CHR1	14119312	14119716	no	yes
CHR1	14128910	14129074	no	yes
CHR1	14131308	14131608	no	yes
CHR1	14181520	14181626	no	yes
CHR1	14185069	14185230	no	yes
CHR1	14212070	14212172	no	yes
CHR1	14270106	14270257	no	yes
CHR1	14332147	14332279	no	yes
CHR1	14332816	14333056	no	yes
CHR1	14595269	14595574	no	yes
CHR1	14602746	14602972	no	yes
CHR1	14832735	14833035	no	yes
CHR1	14913161	14913301	no	yes
CHR1	14914238	14914525	no	yes
CHR1	15521760	15521863	no	yes
CHR1	15724336	15724681	no	yes
CHR1	15735656	15736059	no	yes
CHR1	15774681	15775151	no	yes
CHR1	15814167	15814685	no	yes
CHR1	15816510	15816883	no	yes
CHR1	15873856	15874164	no	yes
CHR1	15887648	15887806	no	yes
CHR1	15935857	15935985	no	yes
CHR1	15953743	15953868	no	yes
CHR1	16011856	16012036	no	yes
CHR1	16032557	16033028	no	yes
CHR1	16045694	16045998	no	yes
CHR1	16074285	16074590	no	yes
CHR1	16122513	16122643	no	yes
CHR1	16147452	16147735	no	yes
CHR1	16322307	16322511	no	yes
CHR1	16377965	16378085	no	yes
CHR1	16386500	16386608	no	yes
CHR1	16476116	16476282	no	yes
CHR1	16496197	16496513	no	yes
CHR1	16504953	16505195	no	yes
CHR1	16565936	16566138	no	yes
CHR1	16587352	16587934	no	yes
CHR1	16824912	16825022	no	yes
CHR1	16899356	16899539	no	yes
CHR1	16914391	16914566	no	yes
CHR1	16955897	16956119	no	yes
CHR1	16956494	16956642	no	yes
CHR1	17039015	17039208	no	yes
CHR1	17446477	17446686	no	yes
CHR1	17659044	17659173	no	yes
CHR1	18334476	18334677	no	yes
CHR1	18682473	18682574	no	yes
CHR1	18720083	18720352	no	yes
CHR1	18994872	18995072	no	yes
CHR1	19238620	19238734	no	yes
CHR1	19345402	19345596	no	yes
CHR1	19609506	19609766	no	yes
CHR1	19706246	19706403	no	yes
CHR1	19732534	19732864	no	yes
CHR1	19733509	19733609	no	yes
CHR1	19897363	19897625	no	yes
CHR1	19997881	19998158	no	yes
CHR1	20090078	20090227	no	yes
CHR1	20715564	20715931	no	yes
CHR1	21046950	21047146	no	yes
CHR1	21276522	21276713	no	yes
CHR1	21289581	21290124	no	yes
CHR1	21303933	21304221	no	yes
CHR1	21748693	21749174	no	yes
CHR1	22232161	22232304	no	yes
CHR1	22660320	22660535	no	yes
CHR1	22665919	22666111	no	yes
CHR1	22854772	22855010	no	yes
CHR1	22865619	22865954	no	yes
CHR1	22975031	22975420	no	yes
CHR1	23017423	23017545	no	yes
CHR1	23160255	23160378	no	yes
CHR1	24092289	24092402	no	yes
CHR1	24254971	24255102	no	yes
CHR1	24274327	24274511	no	yes
CHR1	24482250	24482403	no	yes
CHR1	24483053	24483155	no	yes
CHR1	24633334	24633975	no	yes
CHR1	25012999	25013135	no	yes
CHR1	25460117	25460228	no	yes
CHR1	25631965	25632237	no	yes
CHR1	25724029	25724212	no	yes
CHR1	26467051	26467412	no	yes
CHR1	26478420	26478762	no	yes
CHR1	27186748	27186873	no	yes
CHR1	27932683	27932885	no	yes
CHR1	28191585	28191855	no	yes
CHR1	28716786	28716934	no	yes
CHR1	29138964	29139308	no	yes
CHR2	330098	330262	no	yes
CHR2	441786	441899	no	yes
CHR2	526557	526732	no	yes
CHR2	548087	548319	no	yes
CHR2	973923	974312	no	yes
CHR2	1230327	1230465	no	yes
CHR2	1300962	1301216	no	yes
CHR2	1391047	1391208	no	yes
CHR2	1423914	1424041	no	yes
CHR2	1568758	1569086	no	yes
CHR2	1586175	1586368	no	yes
CHR2	1806970	1807476	no	yes
CHR2	1835671	1835874	no	yes
CHR2	1857144	1857295	no	yes
CHR2	2002741	2002973	no	yes
CHR2	2169167	2169296	no	yes
CHR2	2305304	2305578	no	yes
CHR2	2384236	2384423	no	yes
CHR2	2423571	2423766	no	yes
CHR2	2467205	2467449	no	yes
CHR2	2467831	2467959	no	yes
CHR2	2472273	2472393	no	yes
CHR2	2524548	2524662	no	yes
CHR2	2526648	2527032	no	yes
CHR2	2529417	2529819	no	yes
CHR2	2561278	2561441	no	yes
CHR2	2603106	2603281	no	yes
CHR2	2651966	2652175	no	yes
CHR2	2682173	2682419	no	yes
CHR2	2776911	2777221	no	yes
CHR2	2797282	2797452	no	yes
CHR2	2818134	2818314	no	yes
CHR2	2824811	2825003	no	yes
CHR2	2902879	2903072	no	yes
CHR2	2903763	2903934	no	yes
CHR2	2909461	2909722	no	yes
CHR2	2942035	2942257	no	yes
CHR2	3093190	3093536	no	yes
CHR2	3104195	3104458	no	yes
CHR2	3151402	3151647	no	yes
CHR2	3158220	3158808	no	yes
CHR2	3185506	3185944	no	yes
CHR2	3212355	3212462	no	yes
CHR2	3217108	3217640	no	yes
CHR2	3239672	3239944	no	yes
CHR2	3254915	3255031	no	yes
CHR2	3293332	3293550	no	yes
CHR2	3340288	3340679	no	yes
CHR2	3352782	3352924	no	yes
CHR2	3357615	3357773	no	yes
CHR2	3364097	3364378	no	yes
CHR2	3373079	3373327	no	yes
CHR2	3380938	3381114	no	yes
CHR2	3383864	3383980	no	yes
CHR2	3385475	3385612	no	yes
CHR2	3386539	3386667	no	yes
CHR2	3387051	3387156	no	yes
CHR2	3389373	3389673	no	yes
CHR2	3391382	3391588	no	yes
CHR2	3394260	3394599	no	yes
CHR2	3400124	3400363	no	yes
CHR2	3403044	3403166	no	yes
CHR2	3404450	3405077	no	yes
CHR2	3409252	3409638	no	yes
CHR2	3412829	3412937	no	yes
CHR2	3413703	3413821	no	yes
CHR2	3420887	3421017	no	yes
CHR2	3430566	3430705	no	yes
CHR2	3436520	3436732	no	yes
CHR2	3440008	3440468	no	yes
CHR2	3442121	3442434	no	yes
CHR2	3443358	3443541	no	yes
CHR2	3452496	3453184	no	yes
CHR2	3457615	3457862	no	yes
CHR2	3468640	3468794	no	yes
CHR2	3474576	3475223	no	yes
CHR2	3476212	3476399	no	yes
CHR2	3484149	3484414	no	yes
CHR2	3494961	3495071	no	yes
CHR2	3501361	3501498	no	yes
CHR2	3578081	3578230	no	yes
CHR2	3586355	3586597	no	yes
CHR2	3743329	3743514	no	yes
CHR2	3756886	3757011	no	yes
CHR2	3993987	3994458	no	yes
CHR2	3999758	3999930	no	yes
CHR2	4073980	4074213	no	yes
CHR2	4132574	4132780	no	yes
CHR2	4164261	4164403	no	yes
CHR2	4245343	4245787	no	yes
CHR2	4311282	4311383	no	yes
CHR2	4311848	4311959	no	yes
CHR2	4414688	4414837	no	yes
CHR2	4432907	4433010	no	yes
CHR2	4462570	4463039	no	yes
CHR2	4500804	4501110	no	yes
CHR2	4540992	4541114	no	yes
CHR2	4555145	4555279	no	yes
CHR2	4566563	4566811	no	yes
CHR2	4603813	4603970	no	yes
CHR2	4723614	4723905	no	yes
CHR2	4724344	4724626	no	yes
CHR2	4844023	4844139	no	yes
CHR2	4858354	4858494	no	yes
CHR2	4919987	4920265	no	yes
CHR2	4923983	4924113	no	yes
CHR2	4969535	4970108	no	yes
CHR2	5023917	5024018	no	yes
CHR2	5035500	5035678	no	yes
CHR2	5069887	5070123	no	yes
CHR2	5099638	5099821	no	yes
CHR2	5155194	5155385	no	yes
CHR2	5185461	5185592	no	yes
CHR2	5216810	5217342	no	yes
CHR2	5253577	5253729	no	yes
CHR2	5261385	5261568	no	yes
CHR2	5349892	5349998	no	yes
CHR2	5497237	5497337	no	yes
CHR2	5501759	5502064	no	yes
CHR2	5800753	5800912	no	yes
CHR2	5854026	5854233	no	yes
CHR2	5904111	5904252	no	yes
CHR2	6061792	6062034	no	yes
CHR2	6072891	6073010	no	yes
CHR2	6075362	6075588	no	yes
CHR2	6098063	6098229	no	yes
CHR2	6100519	6100835	no	yes
CHR2	6113464	6113701	no	yes
CHR2	6162214	6162653	no	yes
CHR2	6483244	6483356	no	yes
CHR2	6567130	6567699	no	yes
CHR2	6590719	6590896	no	yes
CHR2	6601560	6601667	no	yes
CHR2	6963622	6963854	no	yes
CHR2	6990750	6990891	no	yes
CHR2	7225110	7225316	no	yes
CHR2	7233356	7233702	no	yes
CHR2	7588483	7588591	no	yes
CHR2	8034514	8034619	no	yes
CHR2	8036303	8036418	no	yes
CHR2	8104663	8104821	no	yes
CHR2	8119971	8120344	no	yes
CHR2	8413297	8413452	no	yes
CHR2	8817624	8817938	no	yes
CHR2	9167972	9168086	no	yes
CHR2	9625146	9625450	no	yes
CHR2	9742621	9742733	no	yes
CHR2	10570340	10570718	no	yes
CHR2	10604602	10604762	no	yes
CHR2	10635116	10635294	no	yes
CHR2	10933627	10933737	no	yes
CHR2	11161820	11162130	no	yes
CHR2	11387105	11387253	no	yes
CHR2	11611596	11611733	no	yes
CHR2	12075892	12076148	no	yes
CHR2	12336635	12336760	no	yes
CHR2	12454142	12454346	no	yes
CHR2	12714319	12714429	no	yes
CHR2	12994084	12994216	no	yes
CHR2	13094565	13094668	no	yes
CHR2	14881850	14881992	no	yes
CHR2	15833590	15833699	no	yes
CHR2	16027717	16027859	no	yes
CHR2	16314067	16314227	no	yes
CHR2	16578081	16578284	no	yes
CHR2	16674119	16674409	no	yes
CHR2	16967159	16967333	no	yes
CHR2	17342464	17342668	no	yes
CHR2	17671442	17671728	no	yes
CHR2	18040078	18040340	no	yes
CHR2	18102337	18102714	no	yes
CHR2	18217845	18217973	no	yes
CHR2	18575371	18575598	no	yes
CHR2	18699983	18700085	no	yes
CHR2	18794230	18794337	no	yes
CHR2	18857200	18857443	no	yes
CHR2	18972014	18972238	no	yes
CHR2	19374080	19374180	no	yes
CHR2	19535658	19535758	no	yes
CHR3	319867	320073	no	yes
CHR3	849206	849357	no	yes
CHR3	1637029	1637308	no	yes
CHR3	2761274	2761455	no	yes
CHR3	2782824	2782975	no	yes
CHR3	2810088	2810412	no	yes
CHR3	3004669	3004878	no	yes
CHR3	3178446	3178598	no	yes
CHR3	3193280	3193433	no	yes
CHR3	3807113	3807256	no	yes
CHR3	3921205	3921322	no	yes
CHR3	4855795	4856123	no	yes
CHR3	4949397	4949566	no	yes
CHR3	5007600	5007726	no	yes
CHR3	5019277	5019538	no	yes
CHR3	5451398	5451636	no	yes
CHR3	5453342	5453459	no	yes
CHR3	5584709	5584825	no	yes
CHR3	6405078	6405194	no	yes
CHR3	6527934	6528047	no	yes
CHR3	6740239	6740466	no	yes
CHR3	6795806	6795920	no	yes
CHR3	7344589	7344699	no	yes
CHR3	7380537	7380669	no	yes
CHR3	7381219	7381412	no	yes
CHR3	7886365	7886511	no	yes
CHR3	7891368	7891525	no	yes
CHR3	8857317	8857426	no	yes
CHR3	9256942	9257137	no	yes
CHR3	9796150	9796285	no	yes
CHR3	9916738	9916859	no	yes
CHR3	10331290	10331487	no	yes
CHR3	10373730	10373985	no	yes
CHR3	11017387	11017539	no	yes
CHR3	11171412	11171516	no	yes
CHR3	11173096	11173274	no	yes
CHR3	11177449	11177810	no	yes
CHR3	11377268	11377485	no	yes
CHR3	11416368	11416552	no	yes
CHR3	11429116	11429225	no	yes
CHR3	11484942	11485125	no	yes
CHR3	11494838	11494956	no	yes
CHR3	11499229	11499642	no	yes
CHR3	11504711	11504845	no	yes
CHR3	11507243	11507625	no	yes
CHR3	11509108	11509504	no	yes
[truncated: 965 more rows]
