# Supplementary material for: Natural depletion of histone H1 in sex cells causes DNA demethylation, heterochromatin decondensation and transposon activation
Source: eLife. 2019 May 28;8:e42530. doi: 10.7554/eLife.42530 (PMC6594752; doi:10.7554/eLife.42530)
Supplement: Figure 3—source data 1. [file elife-42530-fig3-data1.xlsx]

## Sheet: pollen-expressed genes
Genes	WT_TPM	pVC::H1_TPM	p value
AT3G17185	12.2224	1.11928	4.01e-05
AT1G19640	13.9697	2.29425	4.17e-07
AT2G03520	8.63124	1.54163	9.31e-05
AT1G51490	9.54432	1.76113	5.89e-07
AT3G62600	12.3188	2.34812	4.99e-06
AT5G48100	6.02667	1.1507	0.00013243
AT5G37240	5.96141	1.42334	2.83e-05
AT1G32430	7.2122	1.72266	1.3e-05
AT3G53305	15.0285	3.89337	0.000423545
AT3G24506	5.82743	1.64636	0.000417895
AT3G18780	9.8449	2.82075	2.62e-06
AT2G02810	19.7066	5.73856	4.1e-06
AT5G59290	7.08463	2.17315	0.000158971
AT5G28470	8.77737	2.70655	2.53e-05
AT1G16170	18.1855	5.64487	7.08e-05
AT1G16440	7.27984	2.30937	0.000422847
AT5G19760	13.2422	4.29247	9.72e-06
AT5G18200	7.98209	2.61501	0.000162774
AT3G47290	12.9297	4.50296	2.16e-06
AT2G01090	7.49661	2.61998	4.86e-05
AT3G52020	17.4455	6.15314	0.00256068
AT1G71380	16.4828	5.8773	0.000426085
AT3G63500	5.5268	1.97389	7.85e-06
AT5G04347	77.7667	28.4775	0.00679222
AT4G20070	8.02748	2.95768	3.01e-06
AT2G21880	46.5562	17.8864	0.000566215
AT1G64200	113.849	44.1209	8.1e-06
AT1G72350	5.29972	2.07179	0.0322226
AT3G20390	7.60446	2.98629	0.00281125
AT1G67640	17.7702	7.06736	0.00077905
AT4G28700	7.17964	2.86374	0.0044256
AT1G12910	5.98674	2.40314	0.000620908
AT1G19396	7.26396	2.91696	0.00071302
AT5G06340	10.3808	4.19198	0.00199976
AT4G14490	9.34133	3.8131	2.75e-05
AT1G12390	8.98125	3.74619	0.00239725
AT3G16130	6.58257	2.7559	0.0221587
AT4G12340	7.34282	3.07902	0.00541291
AT4G31860	5.73453	2.43705	8.5e-05
AT5G01810	5.37414	2.30861	0.0102295
AT5G43460	41.0856	17.6902	4.13e-05
AT1G22530	5.94264	2.60081	0.00358702
AT5G44610	190.585	83.5858	0.000666719
AT5G55990	5.0742	2.23674	0.00173156
AT1G64561	9.73299	4.29192	0.0444033
AT1G54410	102.397	45.4663	0.000641229
AT5G17610	6.52405	2.90878	0.000190856
AT5G12960	911.097	407.396	0.00144967
AT4G24170	23.6025	10.6153	1.46e-05
AT1G12260	5.08901	2.32195	0.000981067
AT4G16110	39.5352	18.2198	0.000356771
AT5G57040	5.05749	2.33165	0.0280074
AT3G19610	21.5499	10.2091	0.00105233
AT3G44930	12.5179	5.94865	0.000702593
AT2G35930	6.16359	2.94703	0.0337244
AT1G62310	8.45334	4.0894	0.00295007
AT3G52270	5.56589	2.7205	0.000511714
AT1G03230	13.3657	6.54747	0.00345564
AT4G06598	5.19859	2.56631	0.000126636
AT4G33270	5.1984	2.6015	0.000442197
AT5G04760	29.5492	14.7922	0.0315503
AT1G14650	9.15485	4.59842	0.00238973
AT1G15270	6.96479	3.52604	0.00302857
AT2G39900	5.58073	2.83622	0.000207127
AT4G34920	13.0298	6.63026	0.0016643
AT4G38545	5.19357	2.65566	0.000512661
AT5G61680	399.127	204.71	0.000653124
AT5G43050	10.2843	5.28225	0.00102827
AT1G69510	115.164	59.525	0.0100315
AT1G56200	11.5573	6.00969	0.011
AT3G22360	8.82442	4.59567	0.000486118
AT1G29120	6.02568	3.14575	0.000385523
AT3G51075	5.61064	2.92912	0.0225689
AT4G12917	161.22	84.6546	0.000475701
AT5G49450	13.8438	7.26994	0.00864167
AT5G49448	13.8438	7.26994	0.00864167
AT4G24220	13.6135	7.17908	0.000213502
AT1G14640	16.8158	8.9234	0.00814795
AT4G30690	6.89575	3.67839	0.00685705
AT4G30210	7.40101	3.96699	0.000491179
AT5G52420	8.13508	4.36344	0.00877889
AT1G26665	9.41767	5.05834	0.00366346
AT3G51840	8.33111	4.48193	8.15e-05
AT1G29310	7.67947	4.13622	0.000139319
AT5G38005	29.7901	16.0896	0.0284897
AT1G17950	12.0106	6.51157	0.0117575
AT3G17120	6.28362	3.40763	0.00076066
AT3G60780	9.08784	4.95199	0.00401753
AT3G02700	16.4422	8.96143	0.00015553
AT3G11100	39.73	21.6569	6.56e-05
AT5G54569	6.52378	3.55838	0.0203012
AT2G43235	11.6763	6.37477	9.35e-05
AT2G47650	8.40834	4.59816	0.010338
AT4G00840	7.16885	3.94363	0.000603205
AT4G21326	46.4785	25.5759	0.000814876
AT5G66250	6.26349	3.46083	0.000188242
AT5G50040	272.064	150.733	0.00168658
AT2G41780	11.6402	6.45998	0.0046428
AT5G55020	67.2051	37.4321	0.014123
AT3G62290	18.0397	10.1035	0.00609727
AT2G16030	16.3412	9.16875	0.000263521
AT2G19760	25.0662	14.0836	0.00220795
AT1G56280	111.735	62.8857	0.0110707
AT1G19394	66.5983	37.486	0.0278833
AT4G25940	6.79623	3.82579	0.00147809
AT3G02480	172.744	97.6179	0.0195591
AT1G64563	13.6057	7.70202	0.00012081
AT4G37830	16.9966	9.63001	0.0127259
AT2G02760	14.6631	8.3114	0.00224672
AT1G22800	5.05103	2.86875	0.000372263
AT1G10680	6.51438	3.70073	0.00165492
AT4G27100	9.45323	5.37264	4.8e-05
AT4G16680	8.88996	5.08581	0.0295246
AT4G03030	58.7599	33.6782	0.000135614
AT5G28262	24.174	13.9227	0.0200107
AT1G02040	18.3581	10.5788	0.0127027
AT2G29980	8.33744	4.81192	0.000278987
AT4G01230	6.75359	3.89784	0.00321937
AT1G12240	19.7111	11.3775	0.000208372
AT5G28919	5.42871	3.13765	0.00318816
AT5G43210	9.701	5.6176	0.00480165
AT5G64510	157.556	91.5942	0.0205981
AT3G25910	8.86616	5.15807	0.00101544
AT1G61790	39.9655	23.3561	0.00361105
AT3G09550	30.1677	17.6857	0.000271117
AT1G53950	7.55594	4.43849	0.00211274
AT5G41920	8.4617	4.9803	0.00104718
AT5G57565	7.7609	4.57199	0.0204087
AT2G42330	11.5611	6.81772	0.000839997
AT2G03270	5.42452	3.2008	0.00148931
AT4G27480	5.92916	3.49963	0.000955471
AT3G11450	5.31761	3.14035	0.00286156
AT2G21090	5.85475	3.46587	0.000910755
AT4G35540	7.53727	4.46263	0.000555221
AT3G48140	19.049	11.2849	0.0133166
AT1G27650	5.93967	3.51883	0.00268058
AT5G57815	11.1784	6.62442	0.00305828
AT1G74010	185.057	109.873	0.000156408
AT5G48780	6.24456	3.71056	0.00180533
AT2G33410	5.37139	3.19491	0.00126383
AT2G39700	2814.77	1674.23	0.00178051
AT2G44410	16.2772	9.68254	0.000203299
AT5G49710	7.41763	4.41335	0.00241592
AT1G49240	73.6726	43.9405	0.00300389
AT2G19450	26.389	15.7838	0.00127516
AT3G06150	84.3587	50.4747	0.000183732
AT5G20360	6.87706	4.1168	0.000239521
AT1G23030	12.2215	7.32884	0.0106516
AT5G22794	7.06144	4.24185	0.0231967
AT5G04390	41.8603	25.1465	0.00536538
AT5G34850	26.8462	16.1351	0.000481062
AT1G14400	21.4878	12.9323	0.00596493
AT5G48140	2622.41	1582.32	0.000596087
AT2G20780	13.2564	8.02771	0.00112055
AT5G46020	11.4818	6.95454	0.00942643
AT3G29390	5.7035	3.4661	0.00277604
AT5G19290	11.9745	7.28286	0.0247223
AT2G19050	303.178	185.021	0.00498423
AT3G20660	9.12999	5.57285	0.0134146
AT5G47560	30.9685	18.9243	0.00169903
AT1G76770	47.6469	29.1283	0.0408442
AT1G19090	18.7396	11.4653	0.000106023
AT5G65480	7.70097	4.71354	0.00539354
AT1G33420	7.37726	4.52718	0.00118938
AT3G10030	11.6345	7.16273	0.00423731
AT2G32090	5.53281	3.41005	0.0310646
AT1G57680	91.9646	56.7108	0.000237998
AT4G32610	17.4333	10.7608	0.00104275
AT3G01050	12.8916	7.96858	0.000951404
AT1G03240	44.4932	27.6142	0.0030842
AT4G27130	58.0608	36.1004	0.0363496
AT1G10890	7.66326	4.77183	0.0028126
AT3G60300	14.3983	8.97204	0.0357155
AT1G15880	49.4744	30.8315	0.00151462
AT3G13277	6.75389	4.21178	0.0267601
AT2G20840	15.645	9.79047	0.000433122
AT5G54010	14.1468	8.85483	0.0141923
AT3G06560	5.63348	3.5298	0.00110772
AT1G03710	5.82771	3.66263	0.00862171
AT1G70800	6.36834	4.01401	0.0195259
AT3G02555	110.694	69.7905	0.00939354
AT4G13980	28.0235	17.6863	0.00225797
AT1G53400	118.061	74.5449	0.0174183
AT3G58750	7.11858	4.50694	0.00304761
AT4G21540	13.369	8.4658	0.00559291
AT5G51970	8.57964	5.45918	0.0199268
AT4G34700	10.8361	6.91412	0.00436422
AT5G54390	15.0233	9.59476	0.00131389
AT4G28150	6.81898	4.36398	0.0156592
AT2G24765	10.1125	6.47738	0.00906827
AT5G16880	45.3709	29.1143	0.0014038
AT1G05640	9.38009	6.0289	0.00901769
AT4G25030	6.78057	4.35916	0.00664914
AT2G41835	7.51898	4.83653	0.0105267
AT2G23985	12.1111	7.79046	0.00423937
AT3G24220	9.63133	6.2108	0.00172925
AT5G16220	24.0791	15.541	0.00165884
AT2G36420	265.32	171.514	0.0255659
AT4G20700	22.2365	14.4018	0.00047691
AT5G27860	5.84458	3.79235	0.00531401
AT1G08030	21.5141	13.9622	0.000379938
AT2G33350	5.06673	3.28889	0.00228439
AT3G60200	32.5507	21.1383	0.00164156
AT4G36648	39.2646	25.5174	0.00199961
AT1G26580	10.2963	6.71559	0.00284689
AT2G17440	20.221	13.2198	0.0254643
AT2G20740	6.77549	4.43509	0.00964187
AT4G36690	63.613	41.7893	0.000618278
AT3G08780	5.01652	3.29756	0.0228619
AT3G13782	5.38572	3.54527	0.0216698
AT2G36500	18.8366	12.4021	0.0146638
AT1G14970	12.6012	8.3055	0.000651834
AT5G38760	3321.31	2191.59	0.0287701
AT3G25585	8.62978	5.69744	0.000626686
AT1G80200	21.9633	14.5214	0.0044893
AT4G28650	7.26166	4.81142	0.00216983
AT1G11380	14.1345	9.37282	0.0278157
AT1G79915	6.19396	4.1091	0.0137884
AT1G20920	34.0603	22.6229	0.00284537
AT5G24206	15.1356	10.0583	0.00723743
AT2G01620	7.05713	4.69116	0.0340289
AT2G45980	6.77596	4.50809	0.0319778
AT1G75220	10.8384	7.23243	0.00200914
AT5G63040	5.84593	3.90239	0.0320062
AT5G38390	7.15619	4.77826	0.0339116
AT2G05850	947.225	632.692	0.0035547
AT1G29850	17.3459	11.5894	0.0474505
AT5G20350	7.02199	4.69607	0.00128516
AT2G18390	15.3085	10.2527	0.00631045
AT5G58690	7.15143	4.79529	0.0155657
AT5G55300	9.23072	6.19086	0.00089631
AT4G31400	6.23139	4.18567	0.00761701
AT3G08650	7.87665	5.29209	0.00221141
AT4G36210	8.49332	5.70953	0.000912931
AT1G20970	28.4149	19.1077	0.000926976
AT3G22510	1343.55	903.695	0.000750986
AT1G75770	19.2796	12.9813	0.00332973
AT2G34770	210.286	141.702	0.0268607
AT4G08320	6.6618	4.48996	0.00414847
AT4G28190	8.0325	5.43038	0.0368411
AT1G27500	39.9467	27.0069	0.000541928
AT2G42780	44.4418	30.064	0.011468
AT1G75780	18.7628	12.7088	0.00116268
AT2G41060	17.198	11.6508	0.00229674
AT5G43930	18.6243	12.6428	0.0076442
AT4G38260	43.9772	29.8807	0.00155817
AT5G48770	7.73451	5.26324	0.00349704
AT5G66050	17.4781	11.8941	0.00118137
AT3G29360	5.99534	4.09891	0.00777909
AT4G09830	25.4377	17.3929	0.00108048
AT1G33290	8.7443	5.98018	0.00874901
AT5G13430	34.0083	23.2654	0.02623
AT4G30310	6.52798	4.47417	0.00931323
AT2G19800	67.3831	46.1834	0.0179827
AT1G61850	7.05661	4.83884	0.0221448
AT5G50380	19.335	13.2631	0.00412618
AT3G06778	107.015	73.4672	0.0287259
AT3G60600	120.897	83.1247	0.0495933
AT5G15650	12.1623	8.3624	0.00285634
AT3G01820	14.8813	10.2427	0.0176016
AT1G02500	13.4588	9.26918	0.00787723
AT5G35200	7.13689	4.91594	0.00227671
AT2G24830	10.3204	7.12663	0.0046567
AT4G35360	8.09469	5.59331	0.00302856
AT5G60600	5.27277	3.64693	0.00212934
AT1G72340	22.7332	15.7262	0.00346097
AT3G63080	7.37218	5.12093	0.0131802
AT5G63370	39.5319	27.4772	0.00125258
AT1G52570	13.6835	9.51995	0.00715543
AT1G49952	11.944	8.31524	0.0434534
AT4G26710	93.2738	64.9416	0.0454896
AT2G03120	6.35846	4.4311	0.00755478
AT1G79340	8.61745	6.00703	0.0470909
AT4G35890	12.3128	8.58823	0.00171127
AT5G65683	6.02482	4.205	0.00815101
AT4G33440	11.4676	8.0181	0.0020907
AT1G07480	14.4363	10.0976	0.00349271
AT5G23130	9.76749	6.83873	0.00708341
AT5G01160	5.98219	4.19169	0.0143944
AT4G21160	7.23552	5.07552	0.00694994
AT2G43790	46.4402	32.5843	0.0263543
AT1G27540	12.185	8.55667	0.00653323
AT5G57870	25.565	17.9898	0.0016195
AT2G41880	24.2755	17.0878	0.015396
AT4G17060	7.84738	5.542	0.0173489
AT5G39420	737.326	521.233	0.00250083
AT3G01640	17.6153	12.4567	0.00547158
AT1G21790	5.14267	3.64084	0.0437424
AT3G16630	8.80981	6.24296	0.00266206
AT4G29450	6.67245	4.73516	0.00854447
AT1G22403	13.4632	9.56899	0.015097
AT3G51630	6.39015	4.54962	0.00702501
AT1G07470	6.76659	4.81779	0.0118192
AT4G39090	13.4775	9.6042	0.0424027
AT5G55310	11.4294	8.17873	0.00156568
AT1G28710	18.6459	13.3553	0.0283047
AT2G34250	11.6543	8.35017	0.00453643
AT1G28960	46.4022	33.2544	0.0161491
AT5G66310	11.8402	8.48767	0.00230398
AT1G69290	26.7498	19.1757	0.045535
AT4G02060	5.77756	4.14224	0.0274201
AT1G04140	8.48162	6.08225	0.00749664
AT5G42330	144.398	103.615	0.0325384
AT2G32900	5.01791	3.60454	0.00772594
AT3G47660	7.21554	5.18943	0.0134928
AT5G52450	12.6573	9.10776	0.0290221
AT3G19860	11.2542	8.10102	0.0206871
AT3G52800	207.282	149.266	0.0117287
AT1G24610	15.5248	11.183	0.0395939
AT1G11040	18.5101	13.3522	0.0103999
AT5G54810	138.288	99.7983	0.0128078
AT4G19600	6.2382	4.50378	0.00486217
AT2G22795	29.5922	21.3675	0.0271284
AT4G17940	123.858	89.5618	0.0288842
AT2G25880	39.2321	28.394	0.0462835
AT2G45670	8.56087	6.20466	0.0105279
AT3G56420	14.14	10.2507	0.0351366
AT5G04540	6.10232	4.42995	0.0192703
AT5G35410	10.7802	7.84461	0.0256692
AT5G19280	5.7642	4.19704	0.00728535
AT1G71800	5.26639	3.83486	0.0168576
AT3G02340	36.2247	26.4036	0.00854738
AT2G04220	36.8946	26.8959	0.0135808
AT2G43160	85.2557	62.2075	0.0126965
AT1G80160	13.6651	9.98162	0.042915
AT5G56160	44.0203	32.1993	0.00185949
AT1G58030	68.2448	49.9831	0.022851
AT2G04865	6.21422	4.55676	0.0221824
AT1G09770	5.93661	4.35751	0.0286973
AT1G12750	6.17485	4.5367	0.0143281
AT4G33530	5.19697	3.82491	0.0127238
AT3G02070	7.70248	5.67253	0.0137895
AT1G67480	191.963	141.403	0.00331158
AT2G31350	43.9937	32.4213	0.00815705
AT2G27050	22.7532	16.7703	0.0465461
AT2G31270	15.0096	11.0715	0.00900085
AT4G32850	6.96756	5.14061	0.00980618
AT4G39260	7.84286	5.78743	0.0466639
AT2G47020	7.54467	5.56847	0.0193827
AT5G05750	17.3018	12.8089	0.0173352
AT3G10410	13.6517	10.1079	0.00923849
AT4G30760	94.158	69.7542	0.0448634
AT2G19880	47.92	35.5028	0.00280863
AT5G66010	24.6422	18.2672	0.0122802
AT1G04300	54.0747	40.0937	0.00254157
AT1G79270	7.01494	5.20491	0.0347872
AT3G59350	255.339	189.703	0.0123272
AT1G16290	6.54087	4.86038	0.0325456
AT1G14830	5.92465	4.4038	0.0147891
AT3G15290	8.96972	6.67508	0.0446917
AT4G31340	27.1466	20.2057	0.0152489
AT2G33100	447.448	333.507	0.031785
AT5G23610	10.466	7.80717	0.0178491
AT4G14230	6.22071	4.64566	0.0197715
AT3G54680	37.9639	28.3575	0.0487098
AT3G48360	7.35847	5.49723	0.0456502
AT1G79750	16.4661	12.3043	0.00678741
AT2G47700	30.0195	22.4538	0.029458
AT5G17910	9.52682	7.13776	0.00859201
AT3G11210	20.9237	15.6949	0.0268349
AT5G12120	22.0008	16.518	0.010653
AT5G16020	7.93557	5.95931	0.0215315
AT3G20310	17.689	13.2839	0.0369519
AT5G60070	11.4951	8.63378	0.011598
AT4G26930	60.0964	45.1493	0.0382789
AT3G44690	6.82436	5.13503	0.0136802
AT1G69570	9.35435	7.04485	0.0346829
AT1G03457	61.2072	46.1166	0.0170981
AT3G15620	6.38098	4.81536	0.0433291
AT1G32120	214.723	162.174	0.00614613
AT3G52010	762.487	575.965	0.0105992
AT2G13100	14.8428	11.2128	0.0195887
AT5G17290	16.5938	12.5484	0.0221958
AT5G13100	52.8756	39.9949	0.0126426
AT2G36900	12.1131	9.16662	0.027089
AT5G51260	12.664	9.59005	0.0486964
AT2G45000	7.88815	5.97353	0.0477399
AT2G28840	31.8758	24.1854	0.00841959
AT3G24740	17.4878	13.2722	0.0131815
AT2G01480	8.4697	6.43771	0.0211015
AT5G40670	23.2452	17.7056	0.0271327
AT3G03090	31.909	24.3151	0.00808156
AT5G28646	9.40802	7.17311	0.0453562
AT5G15430	137.397	104.771	0.0157834
AT1G77300	11.264	8.59597	0.00993551
AT1G19940	8.45822	6.45507	0.0376077
AT3G13900	15.8343	12.0911	0.048601
AT5G44790	100.276	76.6882	0.006778
AT1G79450	11.7059	8.95275	0.0189816
AT5G43060	121.42	92.8978	0.00996311
AT1G69330	12.2442	9.37295	0.0384025
AT4G28260	5.17875	3.96699	0.037979
AT1G54920	45.1365	34.7344	0.00818716
AT5G05660	5.18656	3.99801	0.0389563
AT2G26800	11.9301	9.19716	0.021599
AT5G58190	43.6361	33.6713	0.0137447
AT1G35190	7.95921	6.14244	0.0383615
AT5G02370	17.6753	13.6621	0.0184552
AT1G66260	51.2801	39.6883	0.0115269
AT3G59550	7.93472	6.14307	0.0236599
AT5G06560	43.4254	33.6483	0.0121982
AT4G01290	10.9889	8.52064	0.0174937
AT5G12400	5.94768	4.61213	0.0161564
AT1G55680	22.8079	17.6948	0.0234701
AT5G14720	29.6473	23.0108	0.0116026
AT3G22750	156.867	121.845	0.0150024
AT2G38400	119.598	92.9554	0.0125052
AT5G20390	2052.49	1596.58	0.0343954
AT3G13224	20.2674	15.782	0.0213918
AT3G01540	31.1949	24.2964	0.0171623
AT5G18650	49.6809	38.7094	0.0195706
AT5G58380	195.708	152.654	0.0155416
AT3G48060	6.18804	4.83504	0.0237528
AT3G06760	14.0191	10.9591	0.0460815
AT3G56600	214.895	168.071	0.0188417
AT5G20690	33.616	26.2998	0.0204692
AT5G57200	8.23827	6.44708	0.0297521
AT5G39865	10.8642	8.50279	0.0492228
AT2G28320	9.11093	7.13437	0.0233006
AT3G14890	6.84293	5.35885	0.0240367
AT1G08600	19.4994	15.2736	0.0263111
AT2G17890	80.0003	62.6715	0.0185882
AT5G65950	6.87758	5.38956	0.0437572
AT1G12360	30.9513	24.2644	0.0162312
AT5G60790	14.2784	11.199	0.0352983
AT4G02480	34.2884	26.9362	0.0182696
AT3G08930	8.7714	6.90096	0.0270438
AT2G23790	17.8109	14.0153	0.0403737
AT1G08510	73.604	57.9838	0.0228018
AT1G65220	7.46853	5.88628	0.039992
AT3G05140	119.625	94.3951	0.0317892
AT3G23980	10.1686	8.04173	0.0341616
AT5G46910	17.9441	14.2057	0.0416404
AT3G09850	8.81733	6.98155	0.0455158
AT5G19400	7.40729	5.86864	0.0355057
AT3G24160	9.99261	7.91839	0.0431399
AT2G25870	17.3013	13.7239	0.0479532
AT5G10550	19.4624	15.4382	0.0376387
AT2G02090	14.8878	11.8104	0.0274185
AT3G07960	80.863	64.1923	0.0281307
AT5G02100	34.1545	27.1204	0.0453212
AT5G52990	103.631	82.418	0.0342221
AT5G63770	6.46385	5.15307	0.046204
AT3G61590	16.3138	13.01	0.0381734
AT1G05380	29.8825	23.846	0.021115
AT4G33150	7.64769	6.11131	0.0291538
AT2G45310	555.705	444.79	0.0460505
AT2G44710	11.5531	9.26257	0.0371684
AT2G21520	25.8843	20.7692	0.0321234
AT1G32400	11.7422	9.44308	0.0487455
AT3G22290	49.8564	40.2312	0.0483448
AT5G60740	18.4603	14.9092	0.0470501
AT1G05790	19.0715	15.4085	0.0357298
AT1G12760	17.0673	13.7901	0.0430287
AT5G27000	28.6428	23.1441	0.045243
AT1G61860	240.414	195.504	0.0417028
AT2G43410	10.8337	8.84401	0.0479842
AT3G14720	30.0636	30.3196	0.0456354
AT5G42340	50.7706	51.3809	0.042691
AT5G49890	21.5565	22.0166	0.0399964
AT1G65240	22.9548	23.4455	0.0438054
AT4G02880	6.68885	6.85417	0.0486452
AT5G64030	26.7472	27.5382	0.0392907
AT5G41360	5.47905	5.64384	0.0404972
AT5G59480	58.576	60.3557	0.0314213
AT3G55180	37.7446	38.9153	0.0467893
AT3G50910	116.713	120.599	0.0359449
AT3G06270	267.98	277.257	0.0487323
AT3G06260	963.797	999.256	0.0334337
AT4G33140	13.5217	14.0332	0.0402364
AT2G19400	42.3306	43.9525	0.0389408
AT1G06970	17.3865	18.0594	0.032699
AT3G07070	23.9611	24.9015	0.0410851
AT4G30600	37.4782	38.9604	0.0343702
AT3G26934	2845.03	2962.35	0.0273749
AT5G49900	18.6363	19.4148	0.0304132
AT5G35390	81.0188	84.4175	0.0357228
AT4G38730	52.1579	54.4387	0.0417232
AT5G52560	7.22479	7.54286	0.0354695
AT3G05545	11.8778	12.407	0.0369915
AT3G09530	385.491	402.704	0.0295606
AT5G47180	25.0362	26.1844	0.032152
AT4G13010	10.5406	11.0536	0.0392669
AT1G78940	57.5692	60.4604	0.018981
AT5G40720	158.078	167.009	0.0258651
AT1G03920	41.9394	44.3306	0.0194711
AT5G36260	19.4981	20.6143	0.0223041
AT5G67380	12.1872	12.9071	0.0324402
AT5G26060	1771.69	1877.16	0.012317
AT5G20810	49.2185	52.1683	0.0400488
AT4G34380	65.3779	69.3623	0.0283069
AT3G49450	18.7538	19.8991	0.0362911
AT2G24320	13.5238	14.3559	0.0398103
AT1G04160	11.9371	12.6811	0.0204451
AT1G10940	9.93912	10.5612	0.0257011
AT3G14067	47.9918	51.0869	0.0391671
AT3G08730	375.732	399.981	0.0300766
AT5G09910	9.91186	10.5794	0.0403233
AT1G45160	5.16454	5.51709	0.017193
AT4G22360	12.641	13.5041	0.0318615
AT5G25320	14.5587	15.5571	0.0209017
AT3G05530	16.5788	17.7312	0.0281424
AT5G46630	6.26879	6.71359	0.0498856
AT1G43710	32.3666	34.6658	0.020316
AT4G15530	133.439	143.071	0.0170967
AT3G22760	64.5009	69.2382	0.0499804
AT5G67520	15.787	16.9641	0.0209524
AT3G59920	7.78429	8.36707	0.0388275
AT1G28550	102.468	110.143	0.0423582
AT5G64690	97.4924	104.845	0.0185814
AT5G39400	607.737	653.748	0.0305935
AT4G28540	22.7124	24.4408	0.0300072
AT3G24530	121.152	130.502	0.00918324
AT2G37620	187.743	202.243	0.029258
AT1G22730	34.9737	37.699	0.0197677
AT4G03260	9.68493	10.4572	0.0223413
AT1G24330	11.0277	11.9206	0.0162716
AT1G15430	56.4347	61.0058	0.0257654
AT4G31230	11.5294	12.4664	0.0380444
AT4G11820	5.25317	5.68042	0.0270721
AT1G06050	10.517	11.3792	0.0357066
AT2G23340	174.973	189.382	0.0218581
AT1G18150	40.1344	43.4565	0.021394
AT4G21670	8.82862	9.5596	0.0111678
AT3G27350	14.0621	15.2438	0.0259995
AT4G38940	18.8888	20.4924	0.0233378
AT4G25150	296.93	322.184	0.00597289
AT3G16510	28.8747	31.341	0.0387987
AT4G34881	32.751	35.6327	0.0400434
AT1G27330	47.0624	51.2299	0.0118227
AT2G28440	122.417	133.314	0.00665335
AT3G14790	12.5496	13.6842	0.0230364
AT1G04890	13.2581	14.4614	0.024523
AT3G10470	38.6892	42.2404	0.0129038
AT4G25900	99.8665	109.063	0.0184551
AT1G50010	166.992	182.459	0.00886595
AT5G63320	7.33013	8.01826	0.0128646
AT1G19500	2048.69	2241.17	0.0258432
AT2G33320	22.7025	24.8426	0.0132072
AT3G19950	5.60467	6.13416	0.0451348
AT4G20880	181.803	199.148	0.00803861
AT5G63550	5.82431	6.38524	0.0283791
AT1G48300	44.1703	48.4284	0.01543
AT2G01670	16.8687	18.5234	0.0165588
AT3G16860	10.5838	11.6279	0.0124698
AT1G55080	14.456	15.8878	0.0176577
AT3G61200	44.5834	49.0094	0.0147093
AT3G24120	10.916	12.0028	0.0234373
AT1G73010	46.1625	50.7877	0.0211707
AT1G01090	7.64428	8.43754	0.0398267
AT1G63930	97.3842	107.615	0.0162604
AT3G12110	72.0053	79.6078	0.0313789
AT3G28630	43.8869	48.5768	0.0141318
AT5G49850	8.07577	8.9662	0.0154312
AT3G04700	7552.03	8387.04	0.0398059
AT1G10580	26.6783	29.6578	0.037947
AT3G28830	2610.73	2904.58	0.017615
AT4G34150	14.7558	16.4279	0.0100885
AT5G15600	7963.93	8872.56	0.0184368
AT3G13460	4.64967	5.18094	0.0261891
AT1G10660	151.099	168.531	0.00643077
AT4G38230	127.278	142.012	0.00332127
AT3G50390	35.4315	39.5778	0.00741705
AT5G45330	4.76891	5.33449	0.0160288
AT5G45360	10.7922	12.0845	0.0137904
AT4G37409	17.8617	20.006	0.00987365
AT5G67560	9.75641	10.9326	0.0176531
AT2G43120	22.0907	24.7676	0.0363277
AT3G01620	54.6918	61.3757	0.0442098
AT4G12040	43.8886	49.2646	0.0197528
AT2G42270	6.22036	6.98272	0.00841142
AT4G31430	14.1377	15.8784	0.00382843
AT1G24620	188.827	212.985	0.0185886
AT5G61700	10.4354	11.7731	0.0120184
AT1G70540	421.509	475.603	0.0270292
AT4G34750	1247	1407.86	0.012755
AT5G15030	218.622	247.084	0.0043982
AT4G29440	5.11253	5.77828	0.014468
AT5G13990	195.152	220.642	0.00306436
AT5G23160	74.8665	84.7284	0.0238054
AT2G22807	37.7614	42.7822	0.0365753
AT3G13110	13.0877	14.8297	0.0153387
AT5G58470	6.21104	7.03869	0.0294228
AT5G61350	16.002	18.1429	0.00436231
AT1G69280	13.7167	15.5627	0.0259528
AT5G54148	7.75895	8.80786	0.0310752
AT3G19910	7.04248	7.99943	0.0151038
AT4G26850	11.5724	13.1453	0.00778353
AT1G78140	7.04461	8.00568	0.0144969
AT3G06820	8.50143	9.66357	0.0123333
AT4G00110	139.71	159.242	0.0384941
AT4G01100	13.0649	14.9026	0.0206382
AT5G41780	153.033	174.615	0.0329121
AT4G25590	579.436	661.211	0.00364437
AT1G58290	17.3195	19.777	0.0153563
AT3G02360	6.95774	7.95123	0.0134012
AT5G21050	146.581	167.873	0.0175219
AT4G01850	5.61097	6.42702	0.0228986
AT1G04500	9.23823	10.583	0.00514527
AT1G20220	80.8836	92.6811	0.0198226
AT5G46200	9.08082	10.4054	0.0334476
AT2G41210	75.9216	87.0751	0.00868982
AT3G62250	12.3543	14.1715	0.0431637
AT3G56960	34.4742	39.6335	0.00606868
AT1G02650	4.89309	5.62864	0.02298
AT1G11770	657.728	756.83	0.00240074
AT3G28490	33.0448	38.0315	0.0401762
AT4G40020	62.8563	72.4281	0.00134793
AT4G36800	18.3974	21.2057	0.00949664
AT4G24380	18.276	21.084	0.0402767
AT5G47100	8.21273	9.47904	0.0153498
AT5G08139	4.60342	5.31443	0.0199545
AT4G15980	60.7196	70.2014	0.00512595
AT2G24100	14.4019	16.6576	0.00679932
AT1G11250	112.16	129.855	0.00501383
AT3G02830	37.379	43.3005	0.00603161
AT1G70770	18.3861	21.3057	0.00412454
AT1G43670	20.6353	23.9388	0.00363227
AT5G59370	202.567	235.327	0.025624
AT3G53750	20.8915	24.2841	0.0154289
AT2G16586	591.068	688.19	0.00311118
AT1G65960	73.9968	86.2299	0.00606278
AT2G26490	398.279	465.582	0.00312182
AT2G29360	5.61428	6.56541	0.0263711
AT1G51350	6.86938	8.04765	0.0404408
AT2G29790	8.57052	10.0532	0.00819883
AT4G14368	9.78981	11.49	0.00144792
AT3G54240	200.171	234.944	0.001695
AT5G10650	19.7906	23.2548	0.00877977
AT2G22900	4.25932	5.00587	0.0340082
AT4G27110	69.9594	82.2441	0.00175843
AT3G01250	1503.27	1767.74	0.00242867
AT3G11200	10.8343	12.7558	0.00248708
AT1G78300	148.594	175.166	0.00903582
AT5G14540	7.68993	9.07499	0.0247492
AT1G80230	4.80738	5.67725	0.0303903
AT5G01410	72.3811	85.4851	0.00689601
AT3G20710	5.79405	6.84895	0.0281657
AT3G09840	7.08468	8.3825	0.00281347
AT2G18990	5.53222	6.55169	0.0369817
AT5G35460	6.04067	7.16374	0.0108464
AT5G66830	8.95213	10.6346	0.0382997
AT4G03290	9118.83	10836.2	0.00946884
AT1G07030	4.45051	5.29409	0.00873259
AT2G47730	6.85705	8.16463	0.0333218
AT5G48570	5.87831	7.02045	0.011937
AT2G38360	71.3581	85.3147	0.0391255
AT3G19240	12.7068	15.194	0.0382381
AT3G11900	10.1163	12.0968	0.0249616
AT4G27470	78.8099	94.3233	0.0146997
AT5G18900	17.9456	21.5616	0.00481644
AT1G68750	7.62956	9.1699	0.00185439
AT2G41250	11.063	13.321	0.0403779
AT2G35210	100.982	121.686	0.017883
AT5G02380	65.385	78.7956	0.00219967
AT2G20700	1453.61	1752.94	0.0298616
AT3G51160	8.24439	9.94652	0.00678117
AT5G20220	4.20219	5.07383	0.0225043
AT1G11780	96.719	116.801	0.000717619
AT1G07140	7.49476	9.05987	0.00301014
AT2G13620	15.2412	18.44	0.00127332
AT5G05510	14.6071	17.6957	0.0103721
AT3G25230	6.91382	8.3805	0.00192065
AT4G13230	36.4841	44.2696	0.0461154
AT5G21020	42.8826	52.0381	0.0141692
AT3G21220	6.57312	8.01427	0.0137308
AT1G10470	4.73551	5.77776	0.00859045
AT3G60080	13.8216	16.8835	0.00832488
AT1G75180	5.35916	6.54735	0.00495346
AT5G10660	130.488	159.446	0.000645233
AT3G41768	179.595	219.473	0.0101722
AT3G06830	110.794	135.672	0.000429429
AT3G52460	2868.72	3512.91	0.0124433
AT5G02840	8.79626	10.7905	0.0186295
AT2G02140	3548.63	4356.58	0.0201969
AT5G37060	30.6049	37.6108	0.000557567
AT1G20670	9.01026	11.0752	0.000926232
AT5G59600	15.1972	18.6878	0.00112835
AT5G40700	5.53695	6.81005	0.0431377
AT5G04820	6.78612	8.35984	0.0156581
AT1G19890	28.188	34.7347	0.0134272
AT1G54830	81.1051	99.9882	0.030211
AT4G37970	4.76149	5.87919	0.0174408
AT1G59860	16.0145	19.7779	0.00894446
AT2G23320	15.3122	18.9168	0.0148858
AT1G73230	7.30402	9.02775	0.016101
AT4G37990	9.89009	12.2312	0.00748682
AT1G31340	5.40273	6.68696	0.00708476
AT1G15690	15.5197	19.2113	0.000318895
AT1G74410	5.71401	7.08622	0.0054072
AT4G13560	2296.41	2855.57	0.0205674
AT2G19570	26.1982	32.6313	0.0390669
AT5G49920	1178.62	1469.18	0.0141859
AT3G46520	311.238	388.322	0.00843887
AT1G53500	31.0907	38.9062	0.000768058
AT5G09550	44.4678	55.6542	0.0163586
AT2G05630	15.827	19.8614	0.000505511
AT1G02010	20.2041	25.4088	0.000557332
AT1G54070	3884.63	4886.1	0.0291993
AT5G16050	8.63644	10.8919	0.00806178
AT3G05500	21.4637	27.0809	0.0015283
AT1G06290	4.2253	5.33741	0.00763909
AT3G62880	5.29733	6.69379	0.00310976
AT4G09000	34.7913	43.9776	0.00720356
AT1G01880	9.63774	12.1847	0.000755247
AT4G01070	6.88725	8.76601	0.0446654
AT3G06483	32.2296	41.0742	0.000408029
AT4G37930	12.4455	15.8696	0.00119047
AT3G03080	5.27394	6.7265	0.0424082
AT5G58290	4.69073	5.99003	0.00273983
AT3G12370	12.4184	15.8667	0.00686697
AT1G47280	227.355	290.631	0.00841496
AT3G23410	4.24334	5.42661	0.00722952
AT4G35090	8.32437	10.7228	0.00226397
AT1G13640	4.25345	5.4863	0.00222609
AT2G28370	4.14522	5.34974	0.00766729
AT2G19330	67.8623	87.7146	0.000341444
AT1G66235	13.8832	17.9594	0.0247786
AT3G02980	5.43315	7.04348	0.0388487
AT2G46505	24.1712	31.3413	0.00103066
AT3G61230	270.963	351.657	0.00771718
AT3G27380	7.35194	9.55057	0.0021071
AT3G55400	8.79437	11.4288	0.000483103
AT5G22740	5.88458	7.6737	0.000416081
AT1G69940	797.325	1040.22	0.000615035
AT1G52343	45.7558	59.7492	0.0378489
AT1G26480	204.27	266.877	0.0116257
AT1G06960	5.26833	6.88404	0.0160976
AT5G03690	46.2433	60.4414	0.0141212
AT1G62960	14.6852	19.1949	0.00046015
AT5G61690	4.2996	5.62514	0.00097943
AT1G77980	17.0273	22.3077	0.0341805
AT5G55060	11.3232	14.8371	0.000945509
AT2G36880	101.288	132.933	0.00800382
AT3G07390	7.2816	9.56624	0.0353623
AT4G01600	4.802	6.32653	0.0146478
AT3G09390	8.76706	11.557	0.0109339
AT2G29880	9.44273	12.4595	0.022535
AT4G30390	11.0878	14.6354	0.00195073
AT1G56300	18.0496	23.9322	0.04582
AT3G56950	28.8861	38.3479	0.00822211
AT3G54690	142.706	189.677	0.00190675
AT1G20930	4.29362	5.71242	0.00808845
AT5G35090	262.657	349.795	0.0136306
AT3G52720	11.464	15.2768	0.0235893
AT1G35530	5.27015	7.02792	0.00467359
AT2G18080	6.01573	8.03807	0.0125943
AT1G17530	15.8778	21.3507	0.00127234
AT3G05820	50.2467	67.7306	9.61e-05
AT5G58070	7.19202	9.69972	0.010444
AT3G60570	174.431	235.461	0.000515455
AT2G13290	12.3978	16.7774	0.00732745
AT3G07830	18.2215	24.6621	0.00128193
AT5G02230	14.8957	20.2316	0.00313371
AT3G22650	15.333	20.894	0.00579715
AT1G17710	7.9472	10.8349	0.0442092
AT1G54240	4.60477	6.29502	0.00717867
AT4G21980	3.90976	5.34883	0.00533194
AT4G28290	9.62308	13.1818	0.0446985
AT1G09794	6.17654	8.47314	0.00686273
AT1G48590	18.7887	25.8101	0.000397841
AT1G69030	5.88985	8.11493	0.0041461
AT2G45610	39.0102	53.825	0.00364443
AT1G49700	5.85218	8.0987	0.0471143
AT2G19010	20.2534	28.1117	0.0169394
AT1G18540	7.05172	9.79283	0.00779817
AT5G64160	5.28365	7.37382	0.00149715
AT5G49480	9.49665	13.2555	0.0241886
AT4G28000	56.8193	79.3349	0.0021346
AT2G31410	6.47433	9.06602	0.00479197
AT2G46860	439.698	617.287	0.00431428
AT4G14430	39.8019	55.9417	0.000176368
AT1G15415	574.941	811.051	0.00138547
AT4G39860	11.9802	16.9217	0.00123198
AT1G43630	32.8971	46.6013	0.00845739
AT4G33390	22.5151	32.0184	0.000106731
AT5G50100	5.02363	7.16181	0.000347674
AT3G11165	18.6223	26.557	0.000468751
AT2G01260	4.22304	6.15332	0.00030851
AT1G17100	3.71617	5.4177	0.0127307
AT1G25370	16.5536	24.2069	0.00190434
AT3G11745	7.30154	10.6931	0.00479518
AT1G79250	22.8953	33.5373	7.65e-05
AT1G22140	4.45706	6.55363	0.00803645
AT1G26320	10.2915	15.3501	0.00111769
AT5G13490	6.20795	9.26684	0.0235089
AT3G46230	31.0671	46.3752	0.00253476
AT3G28840	17.0215	25.502	0.00154947
AT1G59910	6.18476	9.36503	0.000100551
AT1G28560	4.93592	7.51495	0.00103839
AT5G53905	104.276	158.901	0.000794091
AT5G05090	3.37045	5.16211	0.00296108
AT1G14010	18.5727	28.7033	0.00920544
AT1G63000	114.925	177.643	0.000316762
AT5G62750	8852.89	13695.6	0.0112846
AT3G12580	8.60303	13.3415	0.000685189
AT1G73630	70.6109	109.785	0.000232822
AT4G24570	12.1304	19.0629	0.00445361
AT1G14270	8.09931	12.7503	5.23e-05
AT4G00895	4.55193	7.18827	0.0228657
AT4G01480	9.42471	14.9791	2.61e-05
AT2G20920	6.26008	10.0018	0.000150927
AT2G28355	6.85002	10.9492	0.000325786
AT2G01330	7.41108	11.9686	0.000549314
AT2G22790	4.65786	7.56427	0.00195195
AT1G12090	4.48873	7.30687	0.0280222
AT2G03440	39.452	64.2377	0.00279109
AT4G27310	3.35095	5.51285	0.00161072
AT1G53540	17.5776	29.0446	0.0393364
AT5G01690	12.8781	21.2805	0.000911507
AT1G13950	11.7043	19.434	0.000137814
AT5G17510	5.01131	8.32436	0.000321251
AT5G27980	739.752	1231.39	0.000221877
AT3G24500	4.19933	6.99389	0.00245945
AT2G22860	52.8487	88.3947	0.0225494
AT5G66870	4.60408	7.71808	0.00671147
AT5G61310	83.2004	139.676	0.000128942
AT1G29930	3.29891	5.54924	0.0371229
AT4G17870	13.2659	22.3285	0.00615334
AT1G13350	17.5233	29.7739	1.29e-05
AT3G03250	7.39271	12.5651	0.000369195
AT5G14670	8.42976	14.3331	0.000283197
AT1G14290	133.366	227.307	3.39e-06
AT5G07420	297.586	507.519	2.16e-05
AT3G46750	31.9421	54.527	1.27e-05
AT1G13790	3.15395	5.44533	7.03e-05
AT1G56330	3.58142	6.21364	0.0253001
AT4G29470	51.5155	90.262	0.000694221
AT3G27270	4.84492	8.53792	0.00130029
AT1G13880	4.6516	8.22475	2.01e-05
AT3G03780	30.4561	53.856	0.000231675
AT1G25400	4.57306	8.11864	0.00120485
AT1G14200	15.6744	27.8897	0.000506772
AT1G72630	3.00643	5.35229	0.0128963
AT3G16150	10.0772	18.0961	0.000162606
AT5G39870	23.8273	43.0308	0.00156932
AT2G31425	130.537	238.196	0.000354389
AT3G14730	7.23816	13.3957	2.38e-05
AT4G11485	146.64	271.936	0.00525296
AT4G01470	10.8923	20.2701	0.00931852
AT3G28770	71.4171	133.628	0.000312261
AT2G28080	4.54672	8.51126	0.000717415
AT1G80460	14.3361	26.9083	3.1e-05
AT3G04640	17.0467	32.0964	3.02e-05
AT1G27970	3.60986	6.82104	0.000420313
AT1G62760	7.0557	13.3948	0.0064246
AT1G13900	23.9743	46.0511	1.66e-06
AT4G01660	12.146	23.528	0.000108733
AT2G17525	3.10472	6.04817	0.000133707
AT3G52540	4.43484	8.7304	0.000754326
AT1G13360	34.1741	67.7012	3.6e-06
AT1G28335	289.895	576.184	0.00168452
AT1G14020	3.49481	6.94724	2.78e-05
AT1G63060	70.0245	139.526	0.000392557
AT1G13970	349.08	699.459	1.06e-05
AT1G51360	19.0488	38.7073	6.69e-05
AT1G27340	3.50178	7.16857	0.000101375
AT5G05250	2.65859	5.49581	0.00214959
AT2G19000	212.203	449.516	0.00030649
AT2G38540	6.33855	13.4671	0.00994969
AT1G10522	3.9151	8.42926	0.000475025
AT5G65690	8.25141	17.7879	0.00014909
AT1G13450	14.3135	30.9511	1.91e-05
AT5G53820	44.1585	97.1397	0.00274555
AT1G14320	8.09962	17.8903	3.14e-05
AT1G13890	168.141	372.529	9.28e-06
AT1G78980	4.14907	9.51466	3.17e-06
AT3G46900	8.6096	19.7646	0.0154765
AT2G32885	31.1921	74.927	0.00456187
AT1G68090	2.51336	6.04407	0.000448022
AT4G17690	9.54766	23.3449	0.000195893
AT1G70810	4.87562	11.9327	9.77e-05
AT5G01190	2.76054	7.1724	3.04e-06
AT3G10460	164.821	430.441	0.00127378
AT1G14260	2.94544	7.77173	1.29e-06
AT1G15710	3.61956	10.0237	0.000245118
AT1G11240	1.75828	5.14723	3.83e-05
AT2G17880	1.65255	5.03964	0.000290039
AT3G23270	5.33269	16.2676	2.15e-05
AT5G27720	2.27632	7.32025	0.0193501
AT3G22120	2.2536	7.56921	0.000268491
AT2G33850	2.96529	10.458	0.000253694
AT1G01990	2.91803	11.427	4.17e-05
AT4G38770	2.967	12.9784	1.26e-05
AT1G24881	1.55842	10.7121	0.0112833
AT1G72880	11.0516	11.3592	0.050077
AT3G04620	222.796	176.548	0.0500969
AT2G42080	5.37259	5.69455	0.0504986
AT2G16040	7.96038	10.0383	0.0507939
AT5G11110	5.65245	4.42957	0.0508773
AT3G58120	8.28625	9.05609	0.0509983
AT5G67320	14.5931	11.661	0.0512442
AT1G17290	6.72672	7.04692	0.0514284
AT1G28200	5.2474	5.79121	0.0515241
AT1G19680	12.5275	10.1791	0.0516059
AT2G40000	10.9058	13.321	0.0516609
AT5G22950	4.97592	5.75549	0.0516805
AT1G29750	11.9755	9.43121	0.052021
AT4G37180	13.6602	10.9014	0.052205
AT5G56670	17.1018	21.6451	0.0522592
AT5G20230	749.935	763.031	0.0524224
AT5G66740	24.0822	27.5426	0.0525893
AT5G19360	126.404	100.259	0.052963
AT4G21110	5.04924	3.84181	0.0530336
AT4G38280	8.28633	5.0948	0.0531255
AT2G01100	26.1723	18.5428	0.0531295
AT5G16360	8.17226	6.03221	0.0531297
AT2G06530	21.7941	26.3729	0.0532677
AT1G29630	22.3042	18.2634	0.0533409
AT5G56270	16.7195	16.7552	0.0534922
AT2G21990	194.023	193.821	0.053733
AT5G09880	6.35463	7.2561	0.0540265
AT5G10750	9.8868	10.3415	0.0541961
AT4G28480	25.0927	19.9239	0.0542007
AT1G19780	10.2744	8.23455	0.0543673
AT3G12120	179.177	182.92	0.0544301
AT5G14240	15.8275	11.9368	0.0545452
AT2G15910	27.2225	20.9059	0.0547779
AT4G37640	6.91663	5.20021	0.0549025
AT1G55420	11.5201	12.2917	0.0550766
AT5G25510	10.0237	10.1038	0.0551601
AT4G19190	5.38885	4.42827	0.0554103
AT2G47050	45146	56812.1	0.0554131
AT1G62600	7.0523	5.4867	0.0555174
AT3G51770	52.2472	52.8889	0.0555295
AT1G51200	41.0761	33.7659	0.0557025
AT1G70420	66.0114	73.4703	0.0559176
AT1G28270	3511.83	3525.47	0.0562004
AT5G50565	16.2022	12.8261	0.0564223
AT2G28180	175.062	142.985	0.0564799
AT4G27000	8.69684	6.13248	0.0564815
AT3G44765	5.37275	3.97848	0.0566635
AT2G01450	172.705	137.983	0.0566874
AT1G64320	81.5392	67.3289	0.0567413
AT2G37670	19.1313	15.333	0.0569106
AT3G52730	23.278	23.888	0.0570528
AT5G13810	15.4549	16.5022	0.0573154
AT5G55960	10.2903	7.91259	0.0573543
AT2G45070	53.7647	37.3096	0.0573944
AT3G54620	20.1189	14.7993	0.0576705
AT5G40610	17.4137	18.6901	0.0577713
AT5G62180	10.1358	11.0141	0.0578433
AT5G16500	628.993	653.239	0.0578997
AT1G51060	34.4211	42.5857	0.0583223
AT1G28060	7.96202	8.04932	0.0584797
AT3G47940	8.80197	6.40976	0.058526
AT2G20670	5.64337	4.13261	0.0585957
AT1G68110	1164.36	1190.95	0.0587034
AT3G19580	8.25437	8.81769	0.0587925
AT4G30010	24.8686	27.5883	0.0588001
AT5G15950	35.1419	55.4467	0.0589103
AT1G16240	28.7572	22.313	0.0589831
AT5G25340	535.991	547.254	0.0590362
AT4G19950	15.1206	18.8187	0.0590465
AT1G75810	4.70321	6.0336	0.0591552
AT3G02040	55.7088	56.2301	0.0593548
AT3G30390	5.74407	5.97216	0.0595231
AT5G10090	71.9919	72.6453	0.0595261
AT4G35500	19.752	15.9999	0.0595536
AT2G25560	4.91177	5.14989	0.0596677
AT5G60250	18.9289	15.2068	0.0597275
AT4G00860	20.2838	25.389	0.0599441
AT3G02520	9.69138	10.5138	0.0599822
AT1G03070	18.9043	19.4325	0.060044
AT1G03900	63.2308	50.7514	0.0600708
AT1G01980	2312.46	1735.69	0.0600884
AT1G30270	6.25804	5.0511	0.0600917
AT3G17980	1540.84	1600.25	0.0602365
AT2G22720	21.594	17.5	0.0602848
AT3G62710	1664.98	1766.91	0.0604368
AT1G51260	8.10559	6.5541	0.0605725
AT1G07360	9.10597	9.51526	0.0607455
AT5G25940	12.4457	13.3873	0.0608494
AT4G00300	12.3875	10.2279	0.0609415
AT5G27070	9.64906	5.16387	0.0610279
AT5G25430	35.372	29.5375	0.061086
AT5G40930	8.37262	9.13018	0.0611315
AT2G30020	6.15334	6.59889	0.0613183
AT2G21870	6.87056	5.26776	0.0613448
AT5G21080	17.0667	18.0899	0.0616692
AT4G37610	22.697	26.8562	0.0618903
AT2G42030	9.89365	8.09872	0.0620592
AT1G18750	18.6116	19.6657	0.0624439
AT5G67500	9.2764	6.54714	0.0625721
AT3G50310	88.5418	98.283	0.0628722
AT5G35680	35.0447	38.4462	0.0628745
AT3G47730	14.1655	14.1264	0.0631048
AT4G23490	9.31094	6.91999	0.0634566
AT4G15940	8.27532	5.55513	0.0635446
AT2G47340	1114.92	1259.54	0.0637355
AT5G56760	37.8803	40.9423	0.0641794
AT5G16235	20.3561	13.8469	0.064306
AT4G14950	6.2421	4.96895	0.0643115
AT4G21895	712.091	727.039	0.0643179
AT1G67290	1262.51	1309.84	0.0643845
AT3G16350	18.935	19.2943	0.064396
AT3G24840	7.057	5.63021	0.064439
AT5G66850	28.1382	27.9894	0.0644757
AT3G12620	136.847	114.429	0.064784
AT1G06750	20.1103	20.8069	0.0647851
AT3G01870	125.038	87.8392	0.0650675
AT3G48070	5.77294	6.06095	0.0654545
AT1G03370	7.35651	5.95059	0.0654767
AT2G30580	6.28575	4.95216	0.0656438
AT3G61130	5.5028	5.49026	0.0656769
AT3G11740	126.825	127.697	0.0657743
AT2G45060	7.64005	8.1676	0.0659421
AT1G29760	5.54931	4.3623	0.0661831
AT4G39235	9.68125	11.5912	0.0664408
AT1G67050	10.6519	12.6291	0.0668541
AT2G38410	12.172	12.1845	0.0671178
AT1G74000	40.8637	47.866	0.0673257
AT3G58040	31.2558	32.1769	0.0676126
AT1G06890	88.758	72.1264	0.0676885
AT4G32060	17.8733	14.6452	0.0677254
AT5G57830	40.8314	33.7525	0.0677894
AT5G58040	21.9272	18.2384	0.0678356
AT4G36490	622.531	663.077	0.0678708
AT3G50000	36.4033	27.1052	0.0679012
AT3G30720	8.04995	3.53532	0.068069
AT3G17800	6.09029	4.87062	0.0681741
AT4G10845	10.4845	7.88396	0.0683045
AT4G09720	7.49945	6.08756	0.0684928
AT2G46500	240.702	241.436	0.0686532
AT4G00350	180.27	182.177	0.0687463
AT1G80040	10.5558	11.2351	0.0688538
AT4G18790	42.8659	45.1926	0.0691829
AT1G45545	6.26585	5.02806	0.069243
AT5G13190	5.02141	5.99521	0.0692522
AT1G01500	64.9386	65.8589	0.0692977
AT1G65430	9.55644	9.54182	0.0693005
AT4G17550	16.7897	13.9126	0.0693785
AT1G23540	67.1014	66.6423	0.0696378
AT3G01650	7.89793	6.3551	0.0696602
AT2G42010	12.3156	14.6729	0.0697234
AT3G62230	2368.06	2578.88	0.069728
AT1G75950	156.944	128.736	0.0698307
AT1G08130	5.05602	4.15692	0.0704042
AT4G00810	10.7606	10.9505	0.0705274
AT3G55190	14.3096	15.4439	0.0706321
AT1G68700	5.64097	3.63868	0.0706328
AT5G09430	103.583	101.773	0.0707483
AT1G19440	4.82767	5.22645	0.0710602
AT4G35610	294.109	222.426	0.071094
AT4G16760	5.81929	5.84371	0.071232
AT5G25530	61.0347	66.7329	0.0712679
AT3G53710	28.4838	22.4376	0.0713296
AT3G62180	7381.3	7528.13	0.0714538
AT3G14400	8.59443	8.78777	0.0717626
AT1G19310	7.41711	5.24769	0.0717958
AT2G37550	13.5596	10.5876	0.0720396
AT2G17290	11.0381	11.2284	0.0723088
AT5G45820	106.786	123.747	0.0723225
AT3G17060	1218.29	1260.87	0.0725176
AT1G54320	24.6349	19.8913	0.0725232
AT3G13050	5.30742	5.35394	0.0726489
AT1G16760	25.5807	29.1246	0.0727095
AT4G16695	26.676	18.4072	0.0728753
AT1G72020	6.68484	7.56891	0.0728857
AT4G19040	11.4037	9.55919	0.0729441
AT1G71410	39.9953	33.2715	0.0732548
AT3G59910	11.7613	12.301	0.0733026
AT1G50670	10.419	8.31027	0.0733515
AT2G15880	6215.67	6805	0.0735697
AT1G05120	10.8451	10.9561	0.0735821
AT3G28730	6.64441	5.38208	0.0738437
AT1G55460	5.84446	6.36388	0.0738622
AT5G22940	35.65	29.854	0.0739725
AT5G14890	58.4993	47.9801	0.0740603
AT1G73920	6.46032	6.33552	0.0743059
AT2G41860	245.922	205.57	0.0743431
AT5G65110	5.54736	4.54897	0.0743599
AT1G69840	9.50102	5.94347	0.0744007
AT3G28850	21.9348	22.8608	0.0745061
AT1G15020	9.86649	7.77217	0.0745312
AT2G41740	9.28176	7.92872	0.074546
AT1G55535	10.2274	8.16084	0.0747529
AT4G32440	8.40877	6.35441	0.0749604
AT3G53580	6.09434	6.47123	0.0749776
AT5G66410	12.2394	8.78552	0.0752469
AT1G03060	8.48005	6.9199	0.0754903
AT2G47600	12.5336	9.52837	0.0756412
AT3G27330	7.90494	6.6816	0.0756428
AT3G28500	2.13054	5.3684	0.0756592
AT4G37608	5.39592	5.98939	0.075763
AT2G17370	13.9021	11.1026	0.0760258
AT1G04700	63.6528	63.5614	0.0765244
AT1G71790	12.6866	8.68679	0.0765683
AT1G67623	53.5935	35.98	0.0766843
AT1G59890	7.35581	6.21805	0.0767507
AT3G12510	242.931	232.005	0.0768722
AT2G13680	16.8148	14.0258	0.0770489
AT5G58730	9.44858	7.65396	0.0771084
AT3G12490	6.37892	4.8967	0.0773534
AT5G08240	49.094	41.3446	0.0775981
AT4G38600	6.30368	6.26234	0.077614
AT2G07560	6.13245	6.02861	0.0776396
AT5G62240	276.582	276.542	0.0776884
AT5G40645	64.4608	76.1142	0.0777165
AT2G17420	18.4355	12.1984	0.077743
AT1G12680	9.5173	7.99097	0.0777689
AT5G45810	21.5484	21.7608	0.0777769
AT1G75160	50.9963	50.3685	0.0779512
AT1G06800	11.3231	11.1516	0.0780913
AT3G43860	1906.67	1507.23	0.0781017
AT3G56180	833.126	859.142	0.0785595
AT1G24530	9.7594	7.63391	0.0786457
AT5G23530	8.24662	3.5144	0.0786606
AT1G15920	129.139	94.5049	0.07892
AT5G49940	13.1279	10.1217	0.0789882
AT5G21274	8.65113	9.29115	0.0791578
AT5G12180	509.888	523.032	0.07978
AT1G65440	12.4553	10.4264	0.0798651
AT1G04760	21.0955	16.2189	0.0801913
AT4G11680	11.3266	11.1749	0.0802089
AT2G40475	9.49046	9.95142	0.0802424
AT1G77885	3.33857	8.90199	0.0803677
AT3G54800	1042.09	1095.75	0.0804784
AT4G38800	14.9137	11.6837	0.0808119
AT5G65630	8.79952	8.87935	0.0809727
AT3G16640	195.922	137.863	0.0810953
AT3G05760	5.59097	3.88616	0.0811307
AT4G35940	22.9405	19.3153	0.0812907
AT4G34310	4.99137	5.01183	0.0814587
AT3G17790	23.2385	23.5846	0.0815136
AT1G20480	6.76948	5.46579	0.0816681
AT5G15470	32.5947	32.3467	0.0816855
AT3G07850	4560.89	3592.01	0.081773
AT1G04990	5.85308	4.67415	0.0819877
AT2G20860	100.785	84.1884	0.082097
AT5G53440	9.5254	8.16784	0.0821114
AT4G12610	7.63993	7.44893	0.082172
AT1G79350	6.76938	5.62183	0.0822709
AT4G11760	17.6429	31.5599	0.0823496
AT2G30230	264.379	138.588	0.0824995
AT2G27260	10.5768	11.3228	0.0825797
AT1G64300	60.1411	48.9741	0.0828142
AT4G04077	220.436	77.9968	0.0828221
AT4G32760	11.0663	9.41389	0.0828923
AT5G56340	38.0722	32.686	0.0829476
AT3G17770	7.66876	7.52789	0.0829898
AT1G31240	5.45716	7.29992	0.083172
AT4G32940	5.08285	3.82922	0.083278
AT2G20830	15.959	15.6996	0.083349
AT1G50610	91.6539	91.1127	0.0836588
AT3G51070	9.10285	5.39467	0.0840811
AT5G10260	49.7427	41.9622	0.0841887
AT5G25754	5.24678	5.48461	0.0841908
AT3G48450	641.442	477.56	0.0842222
AT2G32460	335.252	268.852	0.0843263
AT5G20680	5.41007	5.30127	0.0845166
AT4G04800	13.4028	14.6951	0.0845718
AT1G26830	12.7886	10.8334	0.0845778
AT3G49800	12.5579	12.0934	0.0846059
AT2G02960	36.3252	35.6811	0.0847955
AT1G02790	11471.5	12637.6	0.0850535
AT4G12780	5.67033	4.73238	0.0852031
AT5G10980	39.9715	47.4304	0.0852855
AT4G13240	41.1894	40.2228	0.0857791
AT2G25530	6.24204	5.08024	0.0859251
AT1G18300	104.836	87.8944	0.0862437
AT5G58160	9.33369	7.74141	0.0863577
AT5G44060	32.6169	35.4867	0.086961
AT3G01970	6.30238	3.46153	0.087012
AT2G17530	23.9747	20.639	0.0873831
AT4G37120	6.84952	7.36909	0.0878162
AT3G03900	9.60577	9.47882	0.0882536
AT5G14120	8.3607	8.52131	0.0883853
AT5G47470	16.6397	17.1968	0.0884615
AT4G29950	7.80219	6.2771	0.0885434
AT1G24560	7.92783	6.40382	0.0887956
AT5G39650	23.9198	27.8219	0.0888135
AT1G27290	13.8333	10.6679	0.0888797
AT5G17400	213.414	168.512	0.0893676
AT2G43040	9.25946	8.90013	0.0894778
AT3G03100	31.0262	32.2838	0.089503
AT5G58880	14.4774	12.1	0.0897048
AT5G42360	6.93229	5.80829	0.0898216
AT4G33970	2850.42	3018.81	0.0898641
AT3G20580	1078.26	1108.5	0.0901209
AT1G04470	515.33	521.741	0.090163
AT3G55050	46.3553	44.4932	0.090374
AT1G10670	7.53306	5.67843	0.0905989
AT3G61060	5.58393	4.36875	0.0906217
AT3G21570	2933.52	3007.91	0.0908558
AT3G06190	44.6237	44.4935	0.0909109
AT2G37480	5.50129	4.51687	0.0909284
AT2G37478	5.50129	4.51687	0.0909284
AT1G66245	104.681	54.4622	0.0909287
AT1G16270	14.8861	11.1961	0.0909598
AT3G18950	18.3634	13.0823	0.091218
AT4G25610	8.31598	8.13199	0.0916498
AT3G10915	9.12294	9.02846	0.091893
AT5G60550	11.3651	9.48102	0.092054
AT5G60548	11.3651	9.48102	0.092054
AT4G18950	6.35931	4.25399	0.0921668
AT3G29070	7.09202	5.03471	0.0925347
AT5G17090	17.1141	12.9377	0.0925663
AT3G01910	8.47617	8.868	0.0925695
AT1G80470	217.896	225.211	0.0925817
AT1G32530	20.5467	17.6321	0.0926147
AT3G24715	106.633	88.3939	0.092673
AT3G62190	9.45745	7.04052	0.0927441
AT2G42005	246.869	241.795	0.0928052
AT3G01200	15.8096	15.3518	0.0928731
AT3G58110	7.95829	8.12946	0.0932208
AT2G39820	5.25801	3.93987	0.093221
AT4G21660	22.7464	22.0276	0.0932381
AT5G55100	13.5631	13.0089	0.0936441
AT1G06770	34.9519	38.6313	0.0937986
AT1G21660	8.41516	8.19801	0.0938483
AT4G34490	6.30777	6.25917	0.0938787
AT5G55550	22.5621	23.6558	0.0939481
AT1G20840	35.5157	33.8136	0.0944065
AT4G26570	16.8506	14.0605	0.0945239
AT5G03990	6.89715	6.88867	0.0946131
AT5G58720	46.1556	39.7862	0.0946204
AT3G61690	5.66761	4.78357	0.0947864
AT5G11390	7.49784	5.29449	0.0948103
AT5G56310	5.35936	5.16383	0.0948735
AT4G17730	5.58136	4.24114	0.0951795
AT4G27600	14.0368	11.7302	0.0952418
AT1G15790	4.34214	5.28728	0.0953702
AT3G02570	8.79891	9.48738	0.0953909
AT3G03460	9.03759	9.98278	0.0957471
AT2G21480	186.634	188.636	0.095787
AT1G20490	7.35449	7.14496	0.0960656
AT1G20620	10.2472	8.51234	0.0967532
AT5G65890	13.4521	14.9143	0.0967565
AT3G29060	28.6674	24.3629	0.096879
AT3G06570	6.62082	6.93532	0.0968982
AT3G06480	12.1268	10.8009	0.0970341
AT3G60040	8.20321	8.23535	0.0970384
AT5G54640	7.22264	7.15106	0.097171
AT2G02730	60.7994	64.9407	0.0972404
AT1G52580	293.613	307.042	0.0973129
AT1G08150	118.226	100.113	0.0973402
AT5G23270	793.844	804.922	0.0974282
AT4G26990	7.75837	6.70372	0.0976539
AT1G26840	69.47	69.2996	0.0976561
AT4G37680	32.7181	31.1416	0.0977841
AT5G26146	13.6665	13.3884	0.0978029
AT1G50990	7.8714	6.69523	0.0978669
AT2G10970	52.9675	61.424	0.0979781
AT1G75660	8.1446	7.12052	0.097993
AT3G05725	6565.73	6497.06	0.0980152
AT5G44100	20.5542	17.5504	0.0981351
AT5G61230	9.41218	7.66976	0.098207
AT5G61228	9.41218	7.66976	0.098207
AT2G14835	5.79016	4.45086	0.0983373
AT1G79000	5.76627	4.71381	0.0983623
AT1G10865	5.77	4.16842	0.09841
AT3G55620	12.7192	12.7355	0.098463
AT5G22060	8.22694	8.48344	0.0985236
AT3G07330	19.6041	16.3017	0.0985387
AT3G07790	14.7141	12.4342	0.0985679
AT3G09320	5.40654	4.44784	0.0988146
AT3G14205	13.9553	11.7997	0.0989308
AT1G08140	369.155	304.631	0.0989905
AT1G45145	6.77336	5.10243	0.0990286
AT1G49290	697.2	720.527	0.099071
AT4G14960	55.7657	47.2398	0.0992823
AT3G18040	7.03122	7.02216	0.0993044
AT3G56190	16.5666	18.4057	0.0997264
AT1G32380	9.83875	8.27397	0.0998655
AT1G24800	13.1898	5.39207	0.100014
AT5G44340	304.277	297.939	0.100107
AT5G43560	14.2626	12.5488	0.100115
AT5G67488	97.0916	101.062	0.100336
AT5G65685	5.70483	5.30199	0.100526
AT1G33770	23.8867	22.455	0.100636
AT4G17720	13.4463	13.5576	0.100686
AT4G32600	6.36567	5.21102	0.10072
AT3G12160	10.1011	9.82182	0.10105
AT3G47120	14.3248	13.7889	0.10123
AT4G10710	5.08513	4.99422	0.101424
AT4G30710	7.36135	6.35535	0.101542
AT3G58510	23.3421	22.8343	0.101605
AT1G75700	12.1718	9.02324	0.101939
AT3G46200	5.32354	4.41838	0.10222
AT5G01460	6.06683	5.23455	0.10243
AT3G24620	66.9601	64.1574	0.102658
AT5G67480	80.6429	66.8177	0.102895
AT4G30100	5.89944	4.95793	0.102908
AT5G56640	156.237	130.538	0.103213
AT3G11690	635.287	681.497	0.103266
AT1G12840	7.25461	6.86871	0.103299
AT5G57630	5.99108	4.12133	0.103552
AT4G32480	9.58989	9.85247	0.103588
AT5G54650	9.73021	9.31103	0.103941
AT3G29575	26.4712	22.2975	0.103994
AT4G21990	31.0451	30.1343	0.104193
AT1G52240	57.7838	57.7802	0.104402
AT1G11660	5.05121	4.32723	0.104439
AT5G12030	2.30392	7.26387	0.104505
AT1G74830	31.9061	24.083	0.10452
AT5G10990	8.1029	9.35892	0.104775
AT5G41940	5.05706	4.26692	0.105084
AT5G09800	20.2876	21.9756	0.105132
AT1G65590	12.1106	11.5792	0.105394
AT1G15810	5.18062	5.89772	0.105516
AT1G77410	9.13464	7.72094	0.105531
AT1G54710	8.9028	8.35267	0.105622
AT5G39310	15.1804	18.8608	0.105632
AT1G67530	14.1962	13.8306	0.105675
AT5G01290	5.75661	5.43028	0.10579
AT2G41980	9.19338	7.57693	0.105798
AT2G22690	6.98998	6.51856	0.105941
AT1G10170	8.70974	8.1219	0.106083
AT4G17170	264.988	199.973	0.106209
AT5G24560	11.6528	11.85	0.106267
AT5G43300	217.113	179.405	0.106302
AT4G32830	91.0611	72.1392	0.106347
AT5G60170	9.91702	8.8041	0.106817
AT1G04790	7.0151	7.28201	0.107058
AT1G79590	6.60298	5.51235	0.107179
AT5G19910	5.75692	5.8331	0.107277
AT1G10410	8.40723	8.3988	0.107314
AT2G19710	7.64374	6.7702	0.107363
AT2G44470	97.7612	147.749	0.107458
AT1G54170	12.7176	12.1636	0.10752
AT1G77710	20.8971	14.03	0.108012
AT5G65930	7.76783	6.43235	0.10837
AT5G23630	6.73991	6.1783	0.108743
AT4G38930	5.11209	3.89612	0.109056
AT1G33520	12.2248	10.2427	0.109086
AT5G11960	29.4841	23.7085	0.109157
AT5G45710	11.5951	10.4248	0.109387
AT1G61690	5.7623	4.99613	0.109483
AT1G76490	121.356	116.821	0.109494
AT5G57330	7.49128	6.33691	0.109656
AT2G32930	8.35274	8.52451	0.109674
AT1G30810	13.1209	10.8085	0.109701
AT1G70170	40.4368	38.8681	0.109716
AT3G57550	52.0416	44.2297	0.109778
AT3G58480	79.6788	78.1139	0.110037
AT5G02180	23.8131	21.4148	0.110148
AT3G22380	15.5476	13.8145	0.110243
AT1G26850	12.1215	12.281	0.110371
AT5G65090	6.51595	6.93458	0.110489
AT1G77180	72.1434	63.3264	0.11049
AT2G46900	17.7561	15.1277	0.110516
AT1G78895	16.6174	14.7295	0.110617
AT1G04540	808.09	796.572	0.110808
AT5G43130	14.6419	12.5048	0.110814
AT3G56860	6.89599	6.82931	0.111045
AT2G30530	8.57796	8.06138	0.111266
AT4G37420	8.16664	7.58076	0.111446
AT1G12120	8.97309	8.58285	0.111473
AT5G08770	11.5054	12.4748	0.111577
AT3G07030	34.2064	29.0938	0.111675
AT5G15460	5.88642	4.04588	0.111746
AT3G48880	8.3438	6.78354	0.111765
AT1G78900	5.36855	4.69833	0.112003
AT3G61260	391.328	397.687	0.112041
AT3G11420	12.7782	11.9839	0.112041
AT5G26740	8.49313	7.18386	0.112234
AT4G15200	66.2338	62.6776	0.112286
AT4G36195	13.9055	12.35	0.112304
AT3G05580	23.3306	21.8859	0.112309
AT5G08630	12.549	11.4246	0.112518
AT5G57740	10.8652	9.55462	0.112525
AT1G69410	9.07427	8.93202	0.112594
AT5G47520	23.7703	22.9721	0.112676
AT3G48010	13.4671	13.497	0.112718
AT3G13229	115.376	126.239	0.112779
AT4G03110	43.124	42.9425	0.112866
AT1G76940	5.76799	5.64293	0.113035
AT5G04930	5.07022	4.48005	0.113135
AT1G76110	13.0103	13.8633	0.113167
AT1G20110	18.7665	18.5558	0.113204
AT4G03620	74.9041	76.9782	0.113216
AT3G02440	36.3536	33.3998	0.113404
AT1G17820	12.3973	10.591	0.113736
AT1G15780	10.5545	9.3828	0.11378
AT3G56680	55.0095	53.7769	0.113787
AT2G25890	5.96178	4.08359	0.113803
AT1G05820	27.8465	23.4708	0.113911
AT3G51150	73.0862	63.2132	0.113973
AT2G17390	7.29958	6.79492	0.114013
AT5G24318	5.42972	4.50903	0.114018
AT1G17145	6.23788	5.21451	0.114026
AT1G79640	36.0133	35.1411	0.114168
AT1G25540	22.2919	19.5425	0.11445
AT2G03470	54.8762	47.0344	0.114517
AT1G59820	6.23801	5.48758	0.114525
AT3G02910	56.7027	58.0327	0.114585
AT3G42880	51.7563	46.5659	0.114764
AT5G04460	43.6146	38.1213	0.114861
AT3G06780	23.9518	27.8144	0.114879
AT5G62310	7.24396	6.13114	0.114893
AT3G26020	5.85004	5.56246	0.114927
AT3G10540	26.6582	22.7392	0.114971
AT2G44090	25.3511	24.3557	0.1152
AT3G44190	9.13433	7.13013	0.115288
AT5G10500	33.7578	34.1255	0.115365
AT1G10740	87.71	70.8633	0.115427
AT1G14450	6.9484	7.28451	0.115502
AT3G53950	6.84684	6.40305	0.115983
AT3G25600	5.1503	8.16023	0.116002
AT5G51460	17.7807	16.9184	0.116049
AT5G42490	319.235	267.616	0.116119
AT5G12140	22.0642	15.8905	0.116637
AT2G37980	51.1611	48.3757	0.117069
AT4G29260	12.6779	10.4226	0.117104
AT4G31080	68.2705	58.6502	0.117164
AT5G01700	24.0669	21.0426	0.117192
AT4G22780	12.0806	12.1669	0.117203
AT3G10300	4.10034	5.81399	0.117381
AT5G25270	13.2977	12.7141	0.117635
AT3G07940	17.2829	15.7261	0.117661
AT1G45050	17.3437	12.7755	0.117684
AT1G56180	7.61865	6.12208	0.117929
AT1G08190	18.5925	15.6872	0.118103
AT4G02890	107.985	111.961	0.118148
AT5G61530	30.3658	25.213	0.118441
AT3G28150	65.54	62.9846	0.118697
AT1G17890	6.81679	6.60967	0.118735
AT1G16360	6.02294	5.77711	0.118747
AT1G67580	6.0433	5.57844	0.118822
AT4G34100	8.37294	7.3998	0.118838
AT3G07020	13.1682	14.48	0.118846
AT2G46170	18.8669	16.1075	0.119369
AT1G01310	1361.01	1323.07	0.119369
AT3G55600	13.6258	12.6385	0.119404
AT1G65840	43.6823	37.7346	0.119588
AT3G41762	18.0244	23.1144	0.119594
AT3G02970	1017.42	852.039	0.119655
AT1G03620	12.778	11.1278	0.119674
AT5G45410	9.55137	7.76326	0.119853
AT5G01100	45.189	37.6558	0.119854
AT1G52300	21.7557	18.16	0.119968
AT3G14960	7.33838	6.87712	0.119974
AT1G02840	6.74175	5.84217	0.120173
AT5G41992	41.0103	37.4986	0.1202
AT5G41990	41.0103	37.4986	0.1202
AT3G11760	12.3288	11.1091	0.120209
AT3G12690	101.251	103.148	0.120638
AT1G20100	13.4885	12.802	0.120795
AT5G24810	8.04599	7.69897	0.120814
AT1G15470	19.3734	19.1036	0.120846
AT3G19420	9.43681	8.84658	0.120905
AT3G13065	71.4502	60.6443	0.120926
AT5G19000	8.78541	8.10488	0.121002
AT5G09850	11.8415	10.4282	0.121116
AT1G79830	42.6586	36.4254	0.121134
AT5G09250	12.3975	13.1369	0.121242
AT3G48050	6.30076	4.74705	0.121331
AT5G56210	12.2482	10.7889	0.121344
AT4G22330	17.81	16.4012	0.121485
AT1G75560	8.84886	8.46077	0.121653
AT3G05150	40.1094	37.9734	0.121834
AT3G26690	17.7699	16.6852	0.121845
AT3G62240	5.72993	4.98664	0.12192
AT2G39950	16.6255	15.1661	0.121947
AT1G60740	4481.71	4298.92	0.122097
AT1G64230	202.575	153.533	0.122201
AT4G30850	130.45	106.026	0.122445
AT3G61160	1513.97	1561.81	0.122475
AT1G55520	41.1541	33.3211	0.122617
AT5G61620	16.49	11.4252	0.122684
AT1G80540	43.0156	37.3381	0.123056
AT4G13020	10.0615	10.1173	0.123228
AT2G25670	8.39318	8.20123	0.12336
AT3G58160	7.24246	7.61405	0.12339
AT2G40850	849.276	842.599	0.123472
AT2G25290	19.0099	18.0066	0.12351
AT1G28305	265.81	319.345	0.123618
AT5G56190	7.72607	7.05979	0.123882
AT1G54260	6.80641	6.29673	0.123886
AT1G77800	5.64543	5.50154	0.123988
AT1G32220	6.72529	5.71302	0.124063
AT1G44000	42.3981	45.177	0.124084
AT1G61080	60.6914	52.0465	0.124212
AT3G47965	90.5236	95.7248	0.124348
AT3G45040	5.40072	4.35093	0.124359
AT3G61070	7.43129	6.6973	0.124436
AT3G55030	5.05297	3.75465	0.124455
AT3G01700	71266.6	74946.8	0.124564
AT2G28590	7.55903	5.70851	0.124623
AT5G17550	10.3656	10.1078	0.124654
AT3G47670	11.5133	13.4796	0.124957
AT5G13010	9.34172	8.57547	0.125075
AT4G31020	38.0443	35.9712	0.12522
AT5G45840	126.09	120.944	0.12524
AT3G12640	9.9167	9.18166	0.125303
AT3G58030	12.1054	11.3523	0.125624
AT2G38270	22.1046	23.3272	0.125981
AT3G06890	7.7845	5.76347	0.125988
AT1G27350	26.8054	20.7074	0.126165
AT5G62460	16.9684	17.0858	0.126306
AT1G15490	5.65638	5.65979	0.12634
AT4G17640	17.802	14.8283	0.126572
AT1G76600	13.4672	11.2206	0.126625
AT5G60860	27.397	28.5599	0.127111
AT3G10770	29.2226	23.4776	0.127437
AT2G47490	20.6651	20.3867	0.127467
AT3G20040	6.26093	5.74477	0.127511
AT5G58700	19.4261	18.0371	0.127642
AT4G38190	264.346	257.432	0.127683
AT4G35180	261.79	255.381	0.127719
AT2G45820	91.7198	72.3482	0.128008
AT2G17990	18.5715	16.2606	0.128302
AT3G23820	52.0316	40.0518	0.128329
AT2G16018	14.3934	13.6499	0.12852
AT4G38470	5.36458	4.76045	0.12856
AT2G46800	17.7032	15.9332	0.128693
AT3G17510	38.84	36.3394	0.129061
AT5G02770	13.6637	11.4474	0.129336
AT1G32130	13.5591	11.6011	0.129338
AT5G01450	5.81832	5.32939	0.129436
AT5G62560	6.36987	7.19079	0.129744
AT3G49601	10.8175	9.23093	0.129807
AT3G51250	26.7385	24.6092	0.129951
AT4G33630	5.54232	4.95899	0.130228
AT2G01275	28.1102	26.8492	0.130245
AT5G13070	15.1709	15.5981	0.130403
AT4G14410	11.0035	10.1274	0.130459
AT2G23070	76.6822	73.304	0.130521
AT4G18640	130.35	124.527	0.130544
AT3G26890	5.27414	5.12081	0.130576
AT4G32630	54.6358	52.4785	0.130672
AT2G28910	125.105	101.424	0.130753
AT4G30200	12.4377	12.2812	0.130787
AT3G57450	94.8037	78.3194	0.13087
AT2G25600	131.186	114.401	0.130911
AT1G35160	19.4022	20.5678	0.130919
AT1G21010	12.4723	10.9624	0.131002
AT4G04610	58.1113	46.3614	0.131197
AT4G37760	43.1458	38.7301	0.131198
AT4G34940	8.23959	8.11467	0.131517
AT3G20920	8.12357	7.09321	0.132162
AT4G39670	157.842	145.856	0.132176
AT5G22070	37.5542	32.697	0.132429
AT1G22110	43.3088	37.4484	0.132505
AT1G14560	13.5758	12.8611	0.132657
AT1G80120	45.5946	44.0524	0.132896
AT5G16760	10.3927	9.30846	0.133304
AT1G47200	19.114	20.9991	0.133428
AT1G08200	13.2924	13.071	0.13348
AT1G15800	5.3828	4.84803	0.133617
AT3G58680	5.22725	5.44697	0.13364
AT2G31200	6.61796	6.5247	0.1337
AT1G21630	12.0619	10.4515	0.133989
AT3G18750	78.0894	73.9151	0.134145
AT1G12150	16.3283	15.9806	0.134302
AT2G11851	5.19466	4.15194	0.134801
AT3G45090	12.1201	10.6017	0.134887
AT1G51130	5.94851	4.57425	0.134893
AT5G13820	5.35262	5.05951	0.13505
AT1G15772	6.22608	6.41651	0.135246
AT1G67350	14.5321	12.6095	0.135476
AT3G56920	33.6742	29.664	0.135612
AT4G26470	29.9808	24.0585	0.135659
AT5G54780	252.156	247.976	0.135705
AT3G12570	35.1903	28.9565	0.13579
AT1G21695	27.1814	17.8924	0.136248
AT3G19010	21.3082	20.3217	0.136265
AT3G20300	351.89	362.075	0.136564
AT1G49160	6.18338	5.55906	0.136707
AT1G15380	18.3641	15.6743	0.136783
AT3G52220	13.146	12.0451	0.136812
AT1G30050	27.7916	29.2483	0.136897
AT5G26150	27.8143	24.4675	0.136905
AT5G08565	10.2991	8.72125	0.136977
AT5G13150	36.1276	33.9326	0.137022
AT4G20890	542.097	539.75	0.137086
AT4G38932	116.918	87.7501	0.137283
AT4G26650	98.6852	100.36	0.137445
AT3G11530	8.58895	8.31147	0.137644
AT2G25630	21.7691	13.5316	0.138308
AT3G47080	71.2997	67.3743	0.138501
AT4G33230	120.794	114.803	0.138506
AT5G02270	15.2755	13.7209	0.138516
AT2G22560	12.1022	12.8175	0.138549
AT3G21200	9.64485	7.5167	0.138614
AT2G30050	9.76577	8.92569	0.138711
AT2G24860	5.14694	3.95689	0.138714
AT2G28640	17.6743	16.6101	0.138747
AT1G74780	28.6741	25.1025	0.138969
AT3G48570	38.6891	37.1803	0.139267
AT5G18510	6.57375	5.52507	0.139279
AT5G09710	12.5934	11.6052	0.139442
AT5G37230	9.84637	5.98146	0.139585
AT3G27540	14.8374	12.9444	0.139639
AT1G65970	6512.06	6356.55	0.139841
AT4G21720	6.47405	5.29264	0.140171
AT3G59640	8.06639	6.9055	0.140187
AT3G11850	87.9151	75.3502	0.140225
AT2G40990	82.5243	73.011	0.140415
AT3G22845	13.0748	11.8599	0.140509
AT2G20320	168.923	144.825	0.140636
AT3G07400	5.19679	4.72321	0.140646
AT1G31910	5.00951	4.4292	0.1409
AT3G07810	16.846	16.1251	0.140918
AT4G33010	5.30701	4.70901	0.141099
AT4G35800	5.51237	4.90976	0.141105
AT4G09950	59.4825	61.3447	0.141515
AT4G28310	7.57891	5.53454	0.141764
AT1G73030	17.5245	12.3991	0.141879
AT4G14500	8.01373	7.56619	0.141892
AT1G11990	46.3546	44.2279	0.141982
AT1G50490	10.0755	8.19917	0.142225
AT3G06810	5.85418	5.622	0.142303
AT2G22500	11.5194	11.6763	0.142444
AT4G27980	21.0936	20.4071	0.142846
AT1G02660	39.7196	35.6287	0.14299
AT2G04520	20.3164	23.0746	0.143383
AT3G43810	13.1829	9.5603	0.143524
AT1G04450	101.18	105.955	0.144015
AT5G24460	35.9597	35.2206	0.144335
AT1G73480	31.2937	28.8741	0.144352
AT2G26430	11.3345	8.9794	0.144551
AT2G29040	13.8727	12.0359	0.144556
AT5G03760	76.7755	72.0942	0.144614
AT2G37070	10.0819	7.6206	0.144982
AT3G48030	7.68336	7.10757	0.145248
AT2G35190	18.5363	17.1695	0.145438
AT1G73540	279.562	295.835	0.146294
AT4G26100	15.3858	13.6303	0.146435
AT3G07090	14.4443	12.7545	0.146723
AT4G37280	145.168	131.302	0.146767
AT2G26570	5.38258	5.03637	0.147014
AT5G42940	14.6632	11.797	0.147069
AT5G23040	7.00652	5.40914	0.147119
AT2G39760	9.96813	9.00011	0.147175
AT3G10370	5.06265	5.46078	0.147236
AT5G01980	9.74633	8.43426	0.147886
AT4G38225	21.1102	22.0436	0.147999
AT5G42220	28.1946	26.6326	0.148188
AT2G46210	1137.06	1178.42	0.148251
AT1G80280	59.4643	50.4433	0.148404
AT2G36895	5.64387	4.25376	0.148579
AT3G50370	62.537	60.6165	0.148907
AT2G32380	14.0465	11.254	0.149117
AT5G60820	8.74156	7.02547	0.149586
AT2G36630	8.22856	7.40442	0.149664
AT2G18162	5.39987	3.50054	0.149871
AT2G18160	5.39987	3.50054	0.149871
AT5G59550	23.3364	19.2499	0.150124
AT4G38710	11.2813	10.6083	0.150422
AT3G43850	39.3656	47.4951	0.150434
AT1G08420	8.42018	7.09548	0.150546
AT5G08290	14.3567	15.8337	0.150586
AT5G07740	35.0806	30.0936	0.151575
AT1G67680	5.29932	4.96275	0.151591
AT5G55680	52.0608	28.8758	0.151605
AT1G67365	14.2205	13.8028	0.151641
AT1G74320	56.7508	52.8105	0.151915
AT1G14530	5.6397	4.80784	0.152074
AT3G01120	9.48924	9.30391	0.152115
AT5G05140	21.5403	19.4769	0.152238
AT2G31670	8.19586	4.85451	0.1526
AT2G46320	7.87928	8.52358	0.152691
AT2G03060	70.7485	67.4439	0.152798
AT3G61640	5.50589	5.93906	0.153074
AT3G03720	6.97899	6.30788	0.153388
AT1G67190	7.15595	6.2746	0.153479
AT4G20160	133.444	117.766	0.153652
AT3G54740	143.574	135.771	0.153736
AT5G43320	8.1161	6.89454	0.153888
AT3G17710	5.30524	4.09115	0.154219
AT5G11680	11.6048	11.3117	0.154352
AT5G66240	8.765	8.74282	0.154406
AT1G06850	7.80189	7.17063	0.154431
AT5G60930	12.4908	11.0826	0.154478
AT4G15093	31.1133	28.3918	0.154597
AT3G29075	18.3763	15.4265	0.154697
AT2G03410	77.7046	63.7322	0.154839
AT4G33780	5.10362	4.99053	0.154915
AT1G20760	6.14307	5.46059	0.155344
AT4G27840	32.2693	28.2098	0.155404
AT4G11560	12.081	10.6152	0.155694
AT2G39720	17.8032	17.1949	0.1557
AT2G32970	8.11449	7.02402	0.15594
AT5G20410	445.376	430.987	0.15599
AT3G06520	189.252	250.06	0.15638
AT3G59280	20.6337	20.0853	0.156528
AT4G10010	139.4	129.114	0.156589
AT1G12070	27.6712	27.558	0.156721
AT2G13570	221.846	330.442	0.157052
AT2G41970	19.4877	19.1117	0.157254
AT2G18840	7.66143	7.43462	0.15744
AT5G42880	67.8983	62.1863	0.157724
AT4G08590	21.2916	18.9209	0.15834
AT3G23840	7.60697	7.56902	0.15854
AT3G02800	6.84287	5.44843	0.158579
AT5G20620	7.51795	5.83094	0.158581
AT3G57870	6.25058	5.31187	0.158638
AT2G44660	7.56871	6.37225	0.158678
AT3G01015	10.8944	8.59394	0.158774
AT5G62740	5.82477	3.89971	0.158901
AT2G39650	5.0789	4.72498	0.158957
AT3G19970	43.3888	40.9438	0.159198
AT1G05960	69.1843	59.2415	0.159201
AT2G19340	18.9507	20.449	0.159204
AT2G33270	230.168	232.769	0.15936
AT2G39780	43.0709	40.4586	0.159362
AT5G10950	164.628	140.105	0.159713
AT5G63130	5.52094	5.83544	0.159837
AT4G02970	10131.8	10810.1	0.1599
AT2G02720	1598.21	1612.56	0.16025
AT4G01010	23.3163	26.8765	0.160486
AT1G68370	5.43823	5.00704	0.160671
AT3G14595	1277.16	1392.88	0.160894
AT1G62390	7.3308	6.48933	0.161071
AT5G08060	8.92229	6.98583	0.161436
AT3G61680	10.9292	9.19853	0.161574
AT1G77840	34.4661	33.1996	0.161596
AT4G15130	37.965	36.2607	0.161974
AT1G23750	18.0668	12.2406	0.162675
AT4G35070	12.0935	10.8105	0.162683
AT1G60610	19.0542	16.6486	0.162732
AT2G41110	147.894	152.567	0.162771
AT3G15060	29.8775	26.7319	0.162824
AT5G20010	43.9497	45.8049	0.163066
AT1G79280	5.28276	5.07919	0.163251
AT1G09140	6.05204	5.66979	0.163435
AT2G30690	22.8136	18.3679	0.163653
AT4G09150	8.35841	7.94122	0.16366
AT3G28230	11.7784	10.2223	0.16387
AT1G79900	5.71849	5.75301	0.164157
AT1G64980	22.166	20.3448	0.164221
AT2G29950	20.787	17.5824	0.164249
AT4G35830	5.61756	5.12454	0.164266
AT1G28490	9.63097	7.53338	0.164378
AT5G54560	54.6755	56.4238	0.164409
AT3G22530	26.6447	24.6656	0.164719
AT1G61290	166.721	172.207	0.164848
AT5G22875	8.12493	5.44124	0.164933
AT1G61620	8.47393	6.70801	0.165017
AT1G24180	11.1219	8.92412	0.165072
AT2G17500	116.914	108.218	0.165354
AT1G16180	9.16257	7.73139	0.165749
AT1G10230	14.1971	13.6405	0.166041
AT3G52120	6.83569	6.23076	0.166073
AT2G30350	12.9817	12.5404	0.166084
AT4G39080	25.7339	22.2132	0.166207
AT1G64142	6.62603	6.1704	0.16644
AT1G64140	6.62603	6.1704	0.16644
AT5G24940	23.3739	26.2645	0.166609
AT3G46830	6.69822	5.68542	0.166675
AT3G21990	5.10792	4.86277	0.166684
AT5G05100	40.1154	34.907	0.166987
AT2G31800	44.6182	39.8394	0.167063
AT3G62200	18.5848	18.7136	0.167383
AT1G11910	6.18589	5.92418	0.167953
AT3G27290	5.78378	5.1798	0.168034
AT1G70430	14.5333	12.8395	0.168104
AT5G23720	9.47574	8.73055	0.168141
AT1G73860	75.3816	68.8724	0.168271
AT3G59380	6.86942	5.30708	0.168313
AT5G52882	20.9124	18.1488	0.168456
AT3G01040	36.4718	33.1784	0.16855
AT4G31420	40.1342	38.1521	0.168701
AT4G36960	6.07873	5.70588	0.168946
AT4G34710	50.1807	43.1639	0.168969
AT3G03490	22.8773	21.614	0.169036
AT3G47130	16.5203	15.6056	0.169094
AT5G09210	5.03271	4.16822	0.1691
AT3G20190	356.849	337.263	0.169135
AT4G14780	16.9279	18.7324	0.169173
AT3G06455	10.9753	8.2553	0.169236
AT3G02230	139.921	152.615	0.16934
AT4G24580	41.5825	39.058	0.169538
AT3G02410	33.3971	28.1823	0.169641
AT1G78790	7.07479	5.08875	0.170186
AT3G59070	14.484	11.7557	0.17019
AT5G64640	26.0048	24.0525	0.170245
AT1G34190	16.325	12.9405	0.170368
AT3G27503	5.16278	5.96978	0.170802
AT1G08135	10.5068	9.82829	0.17095
AT3G16760	5.19531	4.50751	0.170986
AT2G22340	83.3262	65.2501	0.171202
AT1G52270	13.9952	13.9361	0.171237
AT5G09390	7.68148	6.82868	0.171336
AT1G44120	30.5701	30.9887	0.171471
AT5G53150	8.23651	6.94409	0.171704
AT3G52610	7.14049	6.38811	0.171708
AT3G54850	16.9375	14.901	0.171749
AT5G53360	65.7948	55.8399	0.171793
AT1G03930	7.30535	5.95231	0.171815
AT4G21105	10.0453	8.67194	0.171862
AT5G14870	25.2788	23.6513	0.171878
AT4G30140	486.994	395.183	0.17197
AT2G24450	22818.6	24141.1	0.171975
AT1G17730	7.92979	7.21438	0.172225
AT5G03455	8.43563	6.88897	0.172302
AT5G61980	14.1695	13.4971	0.172786
AT5G41700	63.6678	47.4768	0.172788
AT5G01712	11.1128	12.0471	0.172914
AT5G01710	11.1128	12.0471	0.172914
AT4G07960	286.578	271.094	0.172918
AT1G79660	252.141	187.231	0.17311
AT1G73460	5.22512	4.38612	0.17329
AT2G19770	118.993	128.776	0.173461
AT2G24370	89.8579	82.7251	0.173616
AT2G35680	5.56171	4.49564	0.173623
AT2G27860	10.5184	9.082	0.173716
AT1G30540	5.12649	5.06409	0.174257
AT1G25240	1044.76	1085.34	0.174458
AT3G52605	6.64581	7.42208	0.174483
AT2G20760	8.70266	7.97503	0.174644
AT5G12190	5.29838	6.55501	0.174655
AT1G54740	36.4707	31.1765	0.174705
AT1G79400	9.11569	8.63832	0.174937
AT5G08450	14.1692	12.4409	0.175364
AT3G28710	29.3442	28.4367	0.175924
AT5G58950	230.993	218.644	0.175974
AT5G05370	14.0239	15.8925	0.176067
AT5G58110	21.4934	17.5468	0.176375
AT4G03430	16.2148	15.1415	0.176465
AT5G03590	6.83878	5.66996	0.177296
AT5G64920	115.051	101.126	0.17748
AT3G25900	45.3543	46.7283	0.177639
AT3G26670	10.5168	9.01898	0.178016
AT1G34780	18.5481	16.2272	0.178081
AT3G44920	12.1367	9.84425	0.178091
AT3G07470	54.623	45.8557	0.178253
AT1G09600	24.7899	23.4347	0.178468
AT2G44730	23.0795	23.0787	0.178586
AT1G09320	7.44651	6.95388	0.179274
AT3G05550	32.7368	29.2016	0.179296
AT3G20530	906.517	948.843	0.179412
AT5G05060	10.1228	8.59845	0.179717
AT4G13450	95.6614	85.2481	0.179827
AT4G14905	52.5884	46.2746	0.180158
AT5G65160	43.3462	41.254	0.180845
AT1G58210	6.58109	6.13831	0.181203
AT4G12120	10.8975	10.0455	0.181677
AT1G54280	27.4758	25.534	0.181691
AT2G44970	13.818	12.0166	0.181693
AT3G01090	8.38912	8.62796	0.181782
AT1G09070	90.8216	105.045	0.181847
AT2G25490	7.80659	6.68526	0.181996
AT5G16540	465.536	463.301	0.182912
AT3G54380	7.97992	6.9165	0.183425
AT3G13440	13.9207	10.7555	0.183628
AT2G37370	5.42956	4.43232	0.183782
AT5G58050	695.914	574.304	0.183954
AT5G38650	5.18096	3.86991	0.184116
AT4G16580	21.0612	18.9082	0.184262
AT5G62020	5.30846	4.54948	0.184298
AT5G62500	12.4232	11.8012	0.185211
AT2G30160	8.19302	8.54835	0.185435
AT5G14030	5.44694	5.24176	0.185911
AT2G31830	49.4324	44.8439	0.185988
AT2G46580	14.8538	10.7169	0.186476
AT2G35635	8.2141	7.50643	0.186487
AT1G55190	7.14781	4.79281	0.186902
AT5G43830	23.5388	24.6381	0.187389
AT2G23310	11.2346	10.3993	0.187487
AT4G17210	55.1581	51.2801	0.188198
AT4G08180	18.7802	15.0779	0.188204
AT4G39160	6.94502	6.02706	0.18822
AT3G19690	32.2102	17.9481	0.188314
AT4G27500	134.855	116.24	0.188391
AT3G12140	12.3025	10.6895	0.188785
AT4G39180	134.892	120.89	0.189534
AT3G06700	5.23393	9.27391	0.189679
AT2G46140	88.3067	68.1298	0.189954
AT5G27760	16.9402	13.0501	0.190132
AT2G27960	7.60894	7.68706	0.190479
AT5G10740	31.5117	32.1031	0.190995
AT5G24870	6.09868	6.3488	0.191312
AT4G38250	5.26826	5.7294	0.191328
AT5G62250	5.4147	4.55156	0.191522
AT1G60240	100.688	79.2015	0.191722
AT4G03240	6.0959	5.2815	0.191753
AT3G24100	305.04	216.343	0.191927
AT1G11175	23.8652	21.8082	0.192198
AT1G31750	83.402	91.2867	0.192465
AT4G32510	186.158	163.68	0.192494
AT5G32440	73.4765	65.8758	0.192984
AT4G29340	173.707	192.111	0.192994
AT5G07410	5247.73	5319.69	0.193299
AT5G42890	5.8532	4.99524	0.193671
AT1G72330	603.119	496.104	0.194043
AT5G38895	10.696	9.45595	0.194476
AT4G25230	12.2651	10.7165	0.19499
AT4G27750	15.2313	13.8247	0.195727
AT1G12140	9.11662	8.39101	0.19617
AT3G11410	15.8765	13.8207	0.196511
AT1G72460	25.8326	23.311	0.196764
AT2G43220	56.1397	48.9236	0.19757
AT1G48110	7.80048	6.97985	0.197923
AT5G11650	6.50545	5.74064	0.198214
AT1G49300	10.1781	9.34726	0.198399
AT1G03610	30.5466	30.8195	0.198871
AT1G14590	7.57649	5.22384	0.198917
AT1G78310	23.6576	17.9398	0.198953
AT2G31500	946.746	942.164	0.198999
AT2G33390	19.5086	14.8076	0.199436
AT3G07120	37.1647	35.9368	0.199506
AT1G05020	81.1807	74.9439	0.199582
AT3G62170	2333.55	2338.09	0.199591
AT3G18220	115.628	91.3852	0.199614
AT1G63640	60.1674	52.886	0.199927
AT2G47330	5.35182	4.87331	0.200208
AT4G22740	8.77311	7.66048	0.200417
AT5G47435	32.2849	28.4993	0.200762
AT4G30750	7.44535	7.69022	0.200964
AT3G47410	97.3137	85.3301	0.201665
AT1G02140	26.788	28.7243	0.201735
AT3G59830	40.2298	37.2344	0.201795
AT5G11070	34.3629	37.1733	0.202349
AT5G16780	19.9836	16.264	0.202353
AT5G51030	77.9313	74.2339	0.202613
AT4G22350	6.34337	5.73745	0.20292
AT5G27520	13.6164	12.4119	0.203083
AT5G59610	6.66685	6.37739	0.203103
AT3G10510	7.65955	6.62486	0.203391
AT1G68440	6.69573	5.90141	0.203481
AT3G36659	760.878	757.807	0.203829
AT3G54920	14.7248	11.6973	0.204486
AT3G01240	21720.8	23336	0.204793
AT1G77940	13.4634	11.4432	0.20579
AT5G57690	27.2921	25.3452	0.206136
AT5G04160	12.6012	17.3561	0.206479
AT5G11790	44.4222	36.103	0.206609
AT1G02170	19.7796	17.6223	0.206956
AT5G22000	140.8	125.419	0.207608
AT2G33775	5550.82	5182.32	0.208683
AT3G08710	50.3064	52.0649	0.208693
AT3G19310	306.804	289.113	0.208864
AT3G04360	580.918	493.575	0.209039
AT4G39870	113.837	109.859	0.209279
AT2G18280	360.707	339.18	0.209514
AT3G46430	13.4969	10.1012	0.209565
AT3G26000	8.24992	7.23762	0.209627
AT2G01930	5.07561	4.07854	0.209725
AT5G01820	432.187	391.169	0.209736
AT1G48450	7.14347	6.55487	0.209969
AT5G24880	155.424	146.079	0.21
AT1G12810	39.9863	41.5157	0.21013
AT5G03370	8.3909	8.21272	0.211027
AT2G29050	111.402	103.163	0.211393
AT1G11510	32.8077	30.5538	0.21154
AT5G07470	54.7856	42.2047	0.213155
AT2G42500	13.8188	11.3966	0.213896
AT3G07560	77.4453	61.3488	0.214126
AT4G30770	29.6314	27.2816	0.214185
AT5G04990	10.3773	10.6251	0.21513
AT1G17470	10.5623	8.13975	0.215775
AT3G20200	47.7221	45.3195	0.21637
AT3G28780	110.318	110.639	0.216707
AT3G44713	6.44809	5.4906	0.216928
AT1G10620	87.2401	71.882	0.217114
AT1G11765	5665.4	8628.52	0.217258
AT1G11650	13.212	14.126	0.217314
AT5G07440	115.587	106.989	0.217352
AT3G14270	11.5333	10.7951	0.217585
AT2G43490	12.4393	12.0273	0.218078
AT2G07140	5.56094	3.20373	0.218389
AT1G76180	8.27881	10.2653	0.218526
AT5G28680	498.82	455.224	0.219841
AT3G57530	30.8094	29.3917	0.220254
AT4G39110	561.338	490.153	0.220546
AT1G27700	13.7906	11.7785	0.220591
AT2G29620	9.91436	8.85009	0.220846
AT5G18140	43.1088	33.1867	0.220946
AT3G30380	9.61183	8.3218	0.221345
AT1G09330	7.98404	8.96822	0.221692
AT1G10770	13711.1	13259.7	0.221823
AT2G01290	7.98026	7.31817	0.221959
AT3G54366	14.1272	13.0246	0.22196
AT2G47120	6.91069	7.58077	0.222158
AT1G19650	6.32911	5.12311	0.222752
AT1G22300	6.75847	6.23918	0.223066
AT2G29410	20.125	20.5289	0.223136
AT3G21180	180.372	162.17	0.223464
AT1G62450	50.0277	40.6289	0.223619
AT4G17650	15.7024	14.0298	0.223731
AT1G12370	16.5404	13.7767	0.223881
AT4G24920	7.48449	6.42641	0.225036
AT5G24105	2703.67	2647.97	0.225166
AT5G57320	35.4668	33.3631	0.225551
AT3G59960	11.582	10.9444	0.225597
AT3G63390	5.32684	4.51652	0.22581
AT1G47380	36.1845	30.4244	0.225821
AT1G01725	5.07259	4.22848	0.226914
AT5G14040	32.8271	30.8379	0.227892
AT2G40180	15.045	11.9565	0.228254
AT1G10650	5.18928	4.68187	0.22938
AT2G18340	5.4252	4.27117	0.229508
AT1G77730	47.2532	36.0999	0.230044
AT3G61198	15.2205	15.7724	0.230154
AT1G23350	2641.58	2033.23	0.230216
AT1G23210	11.8793	10.5737	0.230812
AT4G23420	14.6951	21.1595	0.230972
AT3G05600	11.0997	9.75858	0.231339
AT3G55850	13.9677	15.0127	0.231417
AT5G65520	7.93484	4.98538	0.231879
AT1G79930	9.76392	8.67891	0.23199
AT5G47880	8.6947	9.04394	0.232454
AT5G18550	16.8019	15.9446	0.232586
AT3G53490	6.63343	5.59801	0.232922
AT3G25290	10.2864	8.6187	0.233563
AT3G14040	3192.03	2677.79	0.233717
[truncated: 846 more rows]

## Sheet: H1-regulated pollen genes
Genes	pVC::H1 vs WT	Overlap VC DME targets within 500 bp of the TSS
AT5G12960	downregulation	no
AT5G44610	downregulation	no
AT1G64200	downregulation	no
AT1G54410	downregulation	no
AT5G04347	downregulation	no
AT2G21880	downregulation	no
AT5G43460	downregulation	no
AT4G16110	downregulation	yes
AT4G24170	downregulation	no
AT3G19610	downregulation	no
AT2G02810	downregulation	no
AT1G16170	downregulation	no
AT1G67640	downregulation	no
AT3G52020	downregulation	no
AT1G71380	downregulation	no
AT3G53305	downregulation	no
AT1G19640	downregulation	no
AT1G03230	downregulation	no
AT5G19760	downregulation	no
AT3G47290	downregulation	no
AT3G44930	downregulation	yes
AT3G62600	downregulation	no
AT3G17185	downregulation	no
AT5G06340	downregulation	no
AT3G18780	downregulation	no
AT1G64561	downregulation	no
AT1G51490	downregulation	no
AT4G14490	downregulation	no
AT1G12390	downregulation	no
AT5G28470	downregulation	no
AT2G03520	downregulation	no
AT1G62310	downregulation	no
AT4G20070	downregulation	no
AT5G18200	downregulation	no
AT3G20390	downregulation	no
AT2G01090	downregulation	no
AT4G12340	downregulation	yes
AT1G16440	downregulation	no
AT1G19396	downregulation	no
AT1G32430	downregulation	no
AT4G28700	downregulation	no
AT5G59290	downregulation	no
AT3G16130	downregulation	no
AT5G17610	downregulation	no
AT2G35930	downregulation	no
AT5G48100	downregulation	no
AT1G12910	downregulation	no
AT5G37240	downregulation	no
AT1G22530	downregulation	no
AT3G24506	downregulation	no
AT4G31860	downregulation	no
AT3G52270	downregulation	no
AT3G63500	downregulation	no
AT5G01810	downregulation	no
AT1G72350	downregulation	no
AT1G12260	downregulation	no
AT5G55990	downregulation	yes
AT5G57040	downregulation	no
AT1G13970	upregulation	no
AT2G19000	upregulation	no
AT1G13890	upregulation	no
AT3G10460	upregulation	no
AT5G53820	upregulation	no
AT2G32885	upregulation	no
AT1G51360	upregulation	no
AT1G13450	upregulation	no
AT4G17690	upregulation	no
AT3G46900	upregulation	no
AT5G65690	upregulation	no
AT1G14320	upregulation	no
AT2G38540	upregulation	no
AT3G23270	upregulation	no
AT1G24881	upregulation	no
AT5G05250	upregulation	no
AT1G11240	upregulation	no
AT1G78980	upregulation	no
AT5G01190	upregulation	no
AT3G22120	upregulation	no
AT1G70810	upregulation	no
AT4G38770	upregulation	no
AT1G15710	upregulation	no
AT1G14260	upregulation	no
AT1G68090	upregulation	no
AT1G10522	upregulation	no
AT5G27720	upregulation	no
AT2G33850	upregulation	no
AT1G01990	upregulation	no
AT1G27340	upregulation	no
AT2G17880	upregulation	no
