# Supplementary material for: Natural depletion of histone H1 in sex cells causes DNA demethylation, heterochromatin decondensation and transposon activation
Source: eLife. 2019 May 28;8:e42530. doi: 10.7554/eLife.42530 (PMC6594752; doi:10.7554/eLife.42530)
Supplement: Figure 3—source data 2. [file elife-42530-fig3-data2.xlsx]

## Sheet: All known imprinted genes
All known imprinted Genes	Imprinted Genes overlapping endosperm DME targets within 500 bp of the TSS
AT5G67620	AT4G02910
AT5G67120	AT4G04580
AT5G66920	AT5G17320
AT5G66600	AT5G24240
AT5G65870	AT5G38140
AT5G65160	AT1G35630
AT5G65110	AT4G03820
AT5G64440	AT5G26210
AT5G64430	AT4G18400
AT5G64400	AT2G06050
AT5G64260	AT1G59760
AT5G63740	AT4G19520
AT5G63510	AT2G01300
AT5G63225	AT2G05370
AT5G63040	AT2G28380
AT5G62140	AT1G19160
AT5G62110	AT4G02480
AT5G61600	AT2G21130
AT5G60760	AT1G17790
AT5G59920	AT2G31070
AT5G58190	AT4G02733
AT5G58030	AT2G36560
AT5G57900	AT3G11160
AT5G57390	AT4G08590
AT5G57380	AT5G39550
AT5G57035	AT2G03340
AT5G55700	AT5G11460
AT5G54350	AT4G21430
AT5G54095	AT2G04620
AT5G53870	AT1G63020
AT5G53250	AT5G42930
AT5G53150	AT1G59930
AT5G52882	AT1G55950
AT5G52370	AT5G35120
AT5G50950	AT2G34880
AT5G50490	AT4G25530
AT5G50470	AT3G28899
AT5G50310	AT1G55650
AT5G49900	AT2G05350
AT5G49890	AT2G21420
AT5G49810	AT4G18150
AT5G49040	AT5G35375
AT5G48650	AT5G37560
AT5G48545	AT1G11660
AT5G48120	AT5G53150
AT5G47770	AT4G23110
AT5G47620	AT4G31060
AT5G47560	AT1G42470
AT5G46300	AT2G19480
AT5G46080	AT5G36940
AT5G46040	AT5G58190
AT5G45980	AT4G04670
AT5G44750	AT3G26110
AT5G44350	AT5G63040
AT5G44005	AT5G26610
AT5G43870	AT5G48650
AT5G43780	AT4G12900
AT5G43740	AT5G18550
AT5G43420	AT4G09460
AT5G43320	AT5G40360
AT5G43190	AT3G08620
AT5G42930	AT5G33290
AT5G42670	AT3G20750
AT5G42380	AT4G23120
AT5G42235	AT3G16320
AT5G41830	AT5G48545
AT5G41750	AT1G59890
AT5G40890	AT1G60220
AT5G40360	AT2G17690
AT5G39560	AT2G19510
AT5G39550	AT1G70560
AT5G38970	AT4G20800
AT5G38140	AT2G45650
AT5G37600	AT1G62790
AT5G37560	AT2G25560
AT5G37290	AT5G24460
AT5G37000	AT1G34650
AT5G36940	AT2G17310
AT5G35490	AT5G03280
AT5G35375	AT1G44750
AT5G35120	AT3G23060
AT5G33290	AT3G09520
AT5G28300	AT3G24542
AT5G26700	AT5G23380
AT5G26650	AT2G05915
AT5G26610
AT5G26220
AT5G26210
AT5G25930
AT5G24790
AT5G24655
AT5G24460
AT5G24410
AT5G24390
AT5G24240
AT5G23380
AT5G23340
AT5G23330
AT5G23260
AT5G23230
AT5G23210
AT5G22920
AT5G22600
AT5G22470
AT5G22460
AT5G22200
AT5G22020
AT5G21930
AT5G21150
AT5G21100
AT5G20280
AT5G18550
AT5G17320
AT5G17165
AT5G15470
AT5G15140
AT5G14960
AT5G13960
AT5G13820
AT5G13500
AT5G13270
AT5G12960
AT5G11740
AT5G11460
AT5G11430
AT5G10950
AT5G10190
AT5G10140
AT5G08360
AT5G07970
AT5G07430
AT5G06500
AT5G04340
AT5G03370
AT5G03280
AT5G03240
AT5G03220
AT5G03210
AT5G03020
AT5G02970
AT5G02880
AT5G02630
AT5G01640
AT5G01170
AT5G01100
AT4G39955
AT4G39210
AT4G39140
AT4G37660
AT4G37290
AT4G36945
AT4G36120
AT4G35840
AT4G34120
AT4G33945
AT4G33820
AT4G33440
AT4G32810
AT4G32040
AT4G32000
AT4G31900
AT4G31760
AT4G31370
AT4G31180
AT4G31060
AT4G30280
AT4G29860
AT4G29650
AT4G29640
AT4G29580
AT4G29570
AT4G26420
AT4G26140
AT4G25530
AT4G25500
AT4G24640
AT4G24230
AT4G24150
AT4G23120
AT4G23110
AT4G23020
AT4G22400
AT4G22050
AT4G21430
AT4G21215
AT4G20800
AT4G19520
AT4G19120
AT4G18890
AT4G18650
AT4G18400
AT4G18320
AT4G18150
AT4G17500
AT4G17486
AT4G17483
AT4G16760
AT4G16745
AT4G16380
AT4G16180
AT4G15900
AT4G15530
AT4G15400
AT4G15380
AT4G15080
AT4G13610
AT4G13495
AT4G13490
AT4G13460
AT4G13345
AT4G12900
AT4G12870
AT4G12450
AT4G12080
AT4G11940
AT4G11680
AT4G11510
AT4G11400
AT4G11320
AT4G10730
AT4G10160
AT4G09900
AT4G09460
AT4G08590
AT4G05470
AT4G04670
AT4G04580
AT4G03945
AT4G03820
AT4G03610
AT4G03110
AT4G02910
AT4G02733
AT4G02480
AT4G02290
AT4G01840
AT4G01780
AT4G01410
AT4G01060
AT4G00750
AT4G00570
AT4G00540
AT4G00360
AT4G00220
AT3G62230
AT3G61610
AT3G61420
AT3G61140
AT3G60690
AT3G60550
AT3G60360
AT3G58470
AT3G57250
AT3G56060
AT3G55420
AT3G54880
AT3G54800
AT3G54740
AT3G54150
AT3G54100
AT3G53410
AT3G52740
AT3G52480
AT3G51895
AT3G51895
AT3G51120
AT3G50960
AT3G50720
AT3G50060
AT3G49770
AT3G49540
AT3G47600
AT3G47030
AT3G45870
AT3G45090
AT3G45080
AT3G45070
AT3G44720
AT3G44460
AT3G43720
AT3G33528
AT3G29630
AT3G29152
AT3G28980
AT3G28960
AT3G28917
AT3G28899
AT3G28750
AT3G28155
AT3G27300
AT3G27130
AT3G26770
AT3G26590
AT3G26450
AT3G26270
AT3G26110
AT3G25700
AT3G25290
AT3G25250
AT3G25170
AT3G24542
AT3G24250
AT3G23570
AT3G23310
AT3G23060
AT3G22968
AT3G22810
AT3G22560
AT3G21860
AT3G21830
AT3G21220
AT3G21090
AT3G20750
AT3G20620
AT3G20450
AT3G19650
AT3G19160
AT3G17250
AT3G16720
AT3G16320
AT3G15820
AT3G15340
AT3G15290
AT3G14660
AT3G14205
AT3G13430
AT3G13400
AT3G13010
AT3G12690
AT3G11490
AT3G11310
AT3G11160
AT3G11000
AT3G10960
AT3G10900
AT3G10590
AT3G09950
AT3G09520
AT3G09050
AT3G08620
AT3G08040
AT3G07570
AT3G06860
AT3G06650
AT3G06130
AT3G06125
AT3G05725
AT3G05700
AT3G05610
AT3G05600
AT3G04980
AT3G04420
AT3G04200
AT3G03320
AT3G02110
AT3G01640
AT3G01270
AT3G01240
AT3G01230
AT2G48010
AT2G47115
AT2G47030
AT2G47020
AT2G46735
AT2G45840
AT2G45650
AT2G42640
AT2G42430
AT2G41990
AT2G41940
AT2G41150
AT2G40960
AT2G40520
AT2G40020
AT2G39650
AT2G38250
AT2G36760
AT2G36560
AT2G36310
AT2G36050
AT2G35670
AT2G34890
AT2G34880
AT2G34870
AT2G34700
AT2G34090
AT2G33780
AT2G33770
AT2G33280
AT2G32750
AT2G32370
AT2G32150
AT2G31360
AT2G31070
AT2G30970
AT2G30590
AT2G30010
AT2G29940
AT2G29730
AT2G28890
AT2G28380
AT2G27385
AT2G26410
AT2G25560
AT2G24740
AT2G24350
AT2G23790
AT2G23080
AT2G21930
AT2G21830
AT2G21710
AT2G21450
AT2G21420
AT2G21130
AT2G20780
AT2G20310
AT2G20160
AT2G19510
AT2G19480
AT2G19400
AT2G18880
AT2G18280
AT2G17990
AT2G17690
AT2G17310
AT2G16960
AT2G15280
AT2G14850
AT2G13560
AT2G12462
AT2G11810
AT2G07040
AT2G06050
AT2G05915
AT2G05370
AT2G05350
AT2G04620
AT2G03810
AT2G03340
AT2G03210
AT2G03110
AT2G01670
AT2G01300
AT2G01130
AT1G80610
AT1G80510
AT1G79520
AT1G78830
AT1G77960
AT1G77850
AT1G77090
AT1G77030
AT1G77000
AT1G76820
AT1G76250
AT1G75110
AT1G74350
AT1G73560
AT1G73500
AT1G73390
AT1G73090
AT1G72810
AT1G72790
AT1G72520
AT1G72470
AT1G71870
AT1G71100
AT1G70700
AT1G70560
AT1G70440
AT1G70420
AT1G70130
AT1G69900
AT1G69820
AT1G69520
AT1G68725
AT1G67830
AT1G67820
AT1G67510
AT1G67265
AT1G67220
AT1G66630
AT1G65890
AT1G65760
AT1G65360
AT1G65330
AT1G65060
AT1G64610
AT1G63960
AT1G63690
AT1G63090
AT1G63020
AT1G63010
AT1G62800
AT1G62790
AT1G62660
AT1G62340
AT1G62333
AT1G62225
AT1G61330
AT1G61320
AT1G61255
AT1G61097
AT1G61090
AT1G60970
AT1G60740
AT1G60700
AT1G60410
AT1G60400
AT1G60220
AT1G60000
AT1G59930
AT1G59890
AT1G59760
AT1G59720
AT1G59670
AT1G57820
AT1G57800
AT1G56720
AT1G56400
AT1G55950
AT1G55920
AT1G55910
AT1G55650
AT1G55560
AT1G55050
AT1G54940
AT1G54575
AT1G54570
AT1G54490
AT1G54280
AT1G52460
AT1G51680
AT1G51460
AT1G51355
AT1G51300
AT1G51080
AT1G51000
AT1G50260
AT1G49640
AT1G49600
AT1G49490
AT1G49290
AT1G48910
AT1G47740
AT1G47610
AT1G47490
AT1G45249
AT1G44750
AT1G43000
AT1G42470
AT1G41830
AT1G35630
AT1G35580
AT1G35350
AT1G35190
AT1G35183
AT1G34790
AT1G34650
AT1G34180
AT1G34060
AT1G33840
AT1G33260
AT1G32120
AT1G31640
AT1G31630
AT1G31290
AT1G30330
AT1G29730
AT1G29080
AT1G28640
AT1G28630
AT1G28050
AT1G27730
AT1G27130
AT1G27080
AT1G26620
AT1G24030
AT1G24020
AT1G23320
AT1G22710
AT1G22180
AT1G22090
AT1G21910
AT1G21790
AT1G21010
AT1G20910
AT1G20900
AT1G20816
AT1G20795
AT1G20730
AT1G20690
AT1G20680
AT1G20500
AT1G20490
AT1G20380
AT1G20230
AT1G19160
AT1G18250
AT1G17860
AT1G17840
AT1G17790
AT1G17770
AT1G14580
AT1G14520
AT1G13900
AT1G12180
AT1G11850
AT1G11810
AT1G11660
AT1G11590
AT1G11580
AT1G10560
AT1G10550
AT1G09850
AT1G09540
AT1G09380
AT1G09290
AT1G08830
AT1G08600
AT1G08220
AT1G08050
AT1G07705
AT1G07690
AT1G07230
AT1G07135
AT1G06470
AT1G05570
AT1G05320
AT1G05280
AT1G05120
AT1G04540
AT1G03150
AT1G02790
AT1G02660
AT1G02570
AT1G02530
AT1G02000
AT1G01530
AT1G01420

## Sheet: 63 imprinted genes
Genes	WT_TPM	pVC::H1_TPM	H1_WT_p value			A list of 63 imprinted genes that overlap VC DME targets within 500 bp of their TSS
AT2G19480	84.7626	70.0108	0.597487
AT5G24240	53.6969	47.5	0.320528
AT5G58190	43.6361	33.6713	0.0137447
AT4G02480	34.2884	26.9362	0.0182696			Highlighted is the 8 expressed genes out of the 63 genes
AT4G08590	21.2916	18.9209	0.15834
AT5G18550	16.8019	15.9446	0.232586
AT1G59890	7.35581	6.21805	0.0767507
AT1G11660	5.05121	4.32723	0.104439
AT2G05370	3.28406	0.648829	4.12e-05
AT5G26610	1.29193	0.715966	0.0894801
AT4G03820	1.07072	1.07316	1
AT1G59760	0.759938	0.514741	0.0448749
AT5G39550	0.689855	0.440635	0.0467474
AT5G23380	0.689184	0.488529	0.0957682
AT3G16320	0.677824	0.630072	0.322376
AT1G42470	0.647219	0.615715	1
AT4G09460	0.634558	0.0655782	0.00796622
AT2G36560	0.371797	0.321432	0.361569
AT4G21430	0.345557	0.224236	0.118952
AT3G09520	0.308167	0.279756	0.402851
AT2G21420	0.292956	0.160817	0.151609
AT5G48650	0.253786	0.244674	0.479076
AT3G24542	0.179373	0.0883113	NA
AT4G18400	0.175911	0.0976613	0.263346
AT1G44750	0.144647	0.0535045	0.114166
AT2G06050	0.139096	0.254305	0.337681
AT4G04580	0.118447	0.0294963	NA
AT5G26210	0.0895164	0.059684	NA
AT5G33290	0.0874789	0.0188037	0.0516562
AT2G04620	0.0740177	0.0651771	0.571089
AT4G02910	0.072755	0.0658197	NA
AT1G60220	0.0723048	0.127033	0.0730378
AT3G23060	0.0688124	0.0587082	0.564427
AT5G48545	0.0659615	0.024672	NA
AT1G63020	0.0398362	0.00779307	0.0248107
AT5G40360	0.0385904	0.028087	NA
AT4G25530	0.0383951	0.146311	0.0563919
AT4G18150	0.0340297	0.0097676	NA
AT5G36940	0.0335626	0.107798	0.0417351
AT2G05350	0.0285004	0.0078257	NA
AT5G17320	0.0267643	0.0053455	NA
AT2G03340	0.0215543	0.0589246	NA
AT3G20750	0.020814	0.00767343	NA
AT2G45650	0.0197278	0.0402869	NA
AT1G70560	0.0191366	0.0271815	NA
AT4G12900	0.0176218	0.0132689	NA
AT1G55650	0.0168833	0	NA
AT2G17690	0.0135067	0.0507754	NA
AT1G34650	0.0128009	0.00603523	NA
AT4G04670	0.0116467	0.0161659	NA
AT4G19520	0.0081815	0.0173138	0.33802
AT5G11460	0.00654547	0	NA
AT4G23120	0.0043241	0.028361	NA
AT3G08620	0.00226426	0.00289628	NA
AT1G35630	0	0	NA
AT2G01300	0	0	NA
AT1G59930	0	0	NA
AT5G35120	0	0	NA
AT3G28899	0	0	NA
AT5G35375	0	0	NA
AT5G37560	0	0	NA
AT4G23110	0	0	NA
AT2G19510	0	0	NA
