# Supplementary material for: Natural depletion of histone H1 in sex cells causes DNA demethylation, heterochromatin decondensation and transposon activation
Source: eLife. 2019 May 28;8:e42530. doi: 10.7554/eLife.42530 (PMC6594752; doi:10.7554/eLife.42530)
Supplement: Supplementary file 1. — Mean DNA methylation (Met) was calculated by averaging methylation of individual cytosines in each context, and chloroplast CHH methylation was used as a measure of cytosine non-conversion and other errors. SN, sperm nuclei; VN, vegetative nuclei. [file elife-42530-supp1.xlsx]

## Sheet: Sheet1
Supplementary file 1. Sequencing summary statistics for bisulfite sequencing libraries.
Mean DNA methylation (Met) was calculated by averaging methylation of individual cytosines in each context, and chloroplast CHH methylation was used as a measure of cytosine non-conversion and other errors. SN, sperm nuclei; VN, vegetative nuclei.
Sample	Nuclear Genome Coverage	Nuclear CG Met	Nuclear CHG Met	Nuclear CHH Met	Chloroplast CHH Met
WT_SN	37	0.247	0.08	0.011	0.0033
WT_VN	43.7	0.144	0.052	0.018	0.0045
pVC::H1 VN	62.6	0.161	0.058	0.019	0.0053
