# Supplementary material for: Natural depletion of histone H1 in sex cells causes DNA demethylation, heterochromatin decondensation and transposon activation
Source: eLife. 2019 May 28;8:e42530. doi: 10.7554/eLife.42530 (PMC6594752; doi:10.7554/eLife.42530)
Supplement: Supplementary file 2. [file elife-42530-supp2.xlsx]

## Sheet: Sheet1
Supplementary file 2. List of primers for quantitative RT-PCR.
Gene	Forward	Reverse
ATHILA4A	TTGGTGGAAGAGGTTATCAG	GCTGAAACTACTGCTTTTCTG
VANDAL5	GATTACTGATGACCCCATG	CCTCATCATCTGGTTCATTG
ATCOPIA53	TCATATTATCTCTGATGGATC	ACCTGTTCCCTACCATGTG
VANDAL4	GCTTAGCTATCCACGCTATC	CGTCTTCATCTCATGGGAC
LINE/L1	CGATCATTCACTGGTCATTG	ACCCTTCTTTACTAATCCATC
TUA2	CCGTCTCGTCTCTCAGGTTATCTC	CGGAGATGACTGGGGCAT
